# Supplementary material for: Mechanisms Underlying Hypoxia Tolerance in Drosophila melanogaster: hairy as a Metabolic Switch
Source: PubMed Central journal article supplement (PMC2556400; doi:10.1371/journal.pgen.1000221), 2008-10-17
Supplement: pgen.1000221.s002.pdf [file pgen.1000221.s002.pdf]

**Table S1.** List of Significantly Altered Genes in Hypoxia-Selected *Drosophila melanogaster* at Larval Stage

| Flybase ID  | Symbol   | Full_name                       | Fold Change | q-value(%) |
|-------------|----------|---------------------------------|-------------|------------|
| FBgn0035868 | CG7194   | CG7194                          | 9.93        | 0.00       |
| FBgn0040559 | CG14359  | CG14359                         | 9.45        | 0.00       |
| FBgn0012042 | AttA     | Attacin-A                       | 8.98        | 0.00       |
| FBgn0041581 | AttB     | Attacin-B                       | 8.78        | 0.00       |
| FBgn0030357 | CG2471   | CG2471                          | 8.03        | 0.00       |
| FBgn0038509 | CG14332  | CG14332                         | 7.92        | 0.00       |
| FBgn0040992 | CG10570  | CG10570                         | 7.83        | 0.00       |
| FBgn0039685 | Obp99b   | Odorant-binding protein 99b     | 7.63        | 0.00       |
| FBgn0043578 | PGRP-SB1 | PGRP-SB1                        | 7.56        | 0.00       |
| FBgn0032280 | CG17105  | CG17105                         | 7.40        | 0.00       |
| FBgn0041579 | AttC     | Attacin-C                       | 6.58        | 0.00       |
| FBgn0003372 | Sgs1     | Salivary gland secretion 1      | 6.47        | 0.00       |
| FBgn0039299 | CG11854  | CG11854                         | 6.10        | 0.00       |
| FBgn0000594 | Est-P    | Esterase P                      | 5.73        | 0.00       |
| FBgn0030544 | CG13403  | CG13403                         | 5.63        | 0.00       |
| FBgn0045761 | CG10618  | CG10618                         | 5.61        | 0.00       |
| FBgn0033920 | CG8561   | CG8561                          | 5.20        | 0.00       |
| FBgn0037346 | eIF-5C   | eukaryotic initiation factor 5C | 5.06        | 0.00       |
| FBgn0035813 | CG8492   | CG8492                          | 5.01        | 0.00       |
| FBgn0032281 | CG17107  | CG17107                         | 5.00        | 0.00       |
| FBgn0000640 | Fbp2     | Fat body protein 2              | 4.93        | 0.00       |
| FBgn0035089 | Phk-3    | Pherokine 3                     | 4.87        | 0.00       |
| FBgn0050029 | CG30029  | CG30029                         | 4.76        | 0.00       |
| FBgn0040565 | CG7606   | CG7606                          | 4.73        | 0.00       |
| FBgn0034428 | CG18606  | CG18606                         | 4.65        | 0.00       |
| FBgn0033857 | CG13335  | CG13335                         | 4.65        | 0.00       |
| FBgn0030443 | CG12715  | CG12715                         | 4.63        | 0.00       |
| FBgn0033137 | Tsp42Ep  | Tetraspanin 42Ep                | 4.54        | 0.00       |
| FBgn0001224 | Hsp23    | Heat shock protein 23           | 4.51        | 0.00       |
| FBgn0037370 | CG1236   | CG1236                          | 4.51        | 0.00       |
| FBgn0038943 | CG5391   | CG5391                          | 4.35        | 0.00       |
| FBgn0034407 | DptB     | Diptericin B                    | 4.33        | 0.00       |
| FBgn0002533 | Lcp2     | Larval cuticle protein 2        | 4.28        | 0.00       |

|             |            |                                            |      |      |
|-------------|------------|--------------------------------------------|------|------|
| FBgn0041604 | dlp        | dally-like                                 | 4.27 | 0.00 |
| FBgn0034426 | CG10476    | CG10476                                    | 4.24 | 0.00 |
| FBgn0030105 | CG15369    | CG15369                                    | 4.23 | 0.00 |
| FBgn0026190 | PH4alphaMP | prolyl-4-hydroxylase-alpha MP              | 4.20 | 0.00 |
| FBgn0003378 | Sgs8       | Salivary gland secretion 8                 | 4.18 | 0.00 |
| FBgn0002562 | Lsp1alpha  | Larval serum protein 1 alpha               | 4.17 | 0.00 |
| FBgn0004577 | Pxd        | Peroxidase                                 | 4.15 | 0.00 |
| FBgn0038523 | CG7587     | CG7587                                     | 4.13 | 0.00 |
| FBgn0031327 | CG5397     | CG5397                                     | 4.11 | 0.00 |
| FBgn0036410 | CG8100     | CG8100                                     | 4.07 | 0.00 |
| FBgn0025456 | CREG       | Cellular Repressor of E1A-stimulated Genes | 4.04 | 0.00 |
| FBgn0039482 | CG14258    | CG14258                                    | 4.01 | 0.00 |
| FBgn0036030 | CG6767     | CG6767                                     | 4.01 | 0.00 |
| FBgn0032286 | CG7300     | CG7300                                     | 3.87 | 0.00 |
| FBgn0033725 | CG8502     | CG8502                                     | 3.79 | 0.00 |
| FBgn0037372 | CG2091     | CG2091                                     | 3.78 | 0.00 |
| FBgn0040503 | CG7763     | CG7763                                     | 3.78 | 0.00 |
| FBgn0000173 | ben        | bendless                                   | 3.77 | 0.00 |
| FBgn0028373 | inx3       | innexin 3                                  | 3.76 | 0.00 |
| FBgn0003377 | Sgs7       | Salivary gland secretion 7                 | 3.75 | 0.00 |
| FBgn0015396 | jumu       | jumeau                                     | 3.75 | 0.00 |
| FBgn0034856 | yellow-d2  | yellow-d2                                  | 3.73 | 0.00 |
| FBgn0031971 | CG7224     | CG7224                                     | 3.69 | 0.00 |
| FBgn0038449 | CG17562    | CG17562                                    | 3.67 | 0.00 |
| FBgn0026144 | CBP        | sarcoplasmic calcium-binding protein       | 3.59 | 0.00 |
| FBgn0036587 | CG4950     | CG4950                                     | 3.58 | 0.00 |
| FBgn0010381 | Drs        | Drosomycin                                 | 3.49 | 0.00 |
| FBgn0001321 | knk        | knickkopf                                  | 3.47 | 0.00 |
| FBgn0039099 | CG10157    | CG10157                                    | 3.47 | 0.00 |
| FBgn0031248 | CG11912    | CG11912                                    | 3.46 | 0.00 |
| FBgn0031747 | CG9021     | CG9021                                     | 3.44 | 0.00 |
| FBgn0041194 | Prat2      | Phosphoribosylamidotransferase 2           | 3.44 | 0.00 |
| FBgn0037114 | CG7160     | CG7160                                     | 3.44 | 0.00 |
| FBgn0039030 | CG6660     | CG6660                                     | 3.43 | 0.00 |
| FBgn0036468 | CG13461    | CG13461                                    | 3.42 | 0.00 |
| FBgn0050480 | CG30480    | CG30480                                    | 3.40 | 0.00 |

|             |           |                                      |      |      |
|-------------|-----------|--------------------------------------|------|------|
| FBgn0002564 | Lsp1gamma | Larval serum protein 1 gamma         | 3.38 | 0.00 |
| FBgn0000639 | Fbp1      | Fat body protein 1                   | 3.31 | 0.00 |
| FBgn0050440 | CG30440   | CG30440                              | 3.31 | 0.00 |
| FBgn0037975 | CG3397    | CG3397                               | 3.30 | 0.00 |
| FBgn0036393 | CG17362   | CG17362                              | 3.27 | 0.00 |
| FBgn0032639 | CG18563   | CG18563                              | 3.27 | 0.00 |
| FBgn0039593 | CG9989    | CG9989                               | 3.26 | 0.00 |
| FBgn0040817 | CG14132   | CG14132                              | 3.26 | 0.00 |
| FBgn0036782 | CG7320    | CG7320                               | 3.21 | 0.00 |
| FBgn0039239 | CG13641   | CG13641                              | 3.20 | 0.00 |
| FBgn0036929 | CG7668    | CG7668                               | 3.18 | 0.00 |
| FBgn0026431 | Grip75    | Grip75                               | 3.17 | 0.00 |
| FBgn0003375 | Sgs5      | Salivary gland secretion 5           | 3.17 | 0.00 |
| FBgn0037235 | CG1103    | CG1103                               | 3.16 | 0.00 |
| FBgn0028956 | mthl3     | methuselah-like 3                    | 3.15 | 0.00 |
| FBgn0036985 | CG5847    | CG5847                               | 3.14 | 0.00 |
| FBgn0031893 | CG4495    | CG4495                               | 3.14 | 0.00 |
| FBgn0038083 | CG5999    | CG5999                               | 3.14 | 0.00 |
| FBgn0036198 | CG6038    | CG6038                               | 3.13 | 0.00 |
| FBgn0022073 | Thor      | Thor                                 | 3.12 | 0.00 |
| FBgn0031579 | CG15422   | CG15422                              | 3.09 | 0.00 |
| FBgn0038919 | CG17843   | CG17843                              | 3.09 | 0.00 |
| FBgn0028552 | gammaSnap | gamma-soluble NSF attachment protein | 3.08 | 0.00 |
| FBgn0037083 | CG5656    | CG5656                               | 3.04 | 0.00 |
| FBgn0031872 | iHog      | interference Hedgehog                | 3.03 | 0.00 |
| FBgn0004879 | plx       | pollux                               | 3.02 | 0.00 |
| FBgn0031471 | CG3117    | CG3117                               | 3.01 | 0.00 |
| FBgn0004859 | ci        | cubitus interruptus                  | 3.01 | 0.00 |
| FBgn0040532 | CG8369    | CG8369                               | 3.00 | 0.00 |
| FBgn0037974 | CG12224   | CG12224                              | 2.97 | 0.00 |
| FBgn0032785 | CG10026   | CG10026                              | 2.97 | 0.00 |
| FBgn0052091 | CG32091   | CG32091                              | 2.96 | 0.00 |
| FBgn0037782 | CG12813   | CG12813                              | 2.95 | 0.00 |
| FBgn0015024 | Cklalpha  | Casein kinase lalpha                 | 2.94 | 0.00 |
| FBgn0032230 | CG13139   | CG13139                              | 2.93 | 0.00 |
| FBgn0037814 | CG6325    | CG6325                               | 2.93 | 0.00 |

|             |          |                                  |      |      |
|-------------|----------|----------------------------------|------|------|
| FBgn0035176 | CG13905  | CG13905                          | 2.93 | 0.00 |
| FBgn0031559 | CG3513   | CG3513                           | 2.92 | 0.00 |
| FBgn0037672 | sage     | salivary gland-expressed bHLH    | 2.91 | 0.00 |
| FBgn0038420 | CG10311  | CG10311                          | 2.90 | 0.00 |
| FBgn0028992 | sds22    | sds22                            | 2.90 | 0.00 |
| FBgn0032284 | CG7294   | CG7294                           | 2.89 | 0.00 |
| FBgn0026170 | smt3     | smt3                             | 2.89 | 0.00 |
| FBgn0015035 | Cyp4e3   | Cytochrome P450-4e3              | 2.87 | 0.00 |
| FBgn0036467 | CG12310  | CG12310                          | 2.87 | 0.00 |
| FBgn0040832 | CG8012   | CG8012                           | 2.87 | 0.00 |
| FBgn0026076 | UBL3     | UBL3                             | 2.87 | 0.00 |
| FBgn0024194 | rasp     | rasp                             | 2.87 | 0.00 |
| FBgn0051778 | CG31778  | CG31778                          | 2.86 | 0.00 |
| FBgn0035959 | CG4911   | CG4911                           | 2.85 | 0.00 |
| FBgn0038009 | CG17738  | CG17738                          | 2.85 | 0.00 |
| FBgn0037007 | CG5059   | CG5059                           | 2.84 | 0.00 |
| FBgn0038508 | CG5866   | CG5866                           | 2.84 | 0.00 |
| FBgn0031220 | CG4822   | CG4822                           | 2.83 | 0.00 |
| FBgn0041711 | yellow-e | yellow-e                         | 2.82 | 0.00 |
| FBgn0040369 | CG13377  | CG13377                          | 2.82 | 0.00 |
| FBgn0041182 | TepII    | Thiolester containing protein II | 2.81 | 0.00 |
| FBgn0036101 | ninA     | ninjurin A                       | 2.81 | 0.00 |
| FBgn0035936 | Tsp66E   | Tetraspanin 66E                  | 2.80 | 0.00 |
| FBgn0030326 | CG2444   | CG2444                           | 2.79 | 0.00 |
| FBgn0031216 | CG11376  | CG11376                          | 2.79 | 0.00 |
| FBgn0040833 | CG7498   | CG7498                           | 2.79 | 0.00 |
| FBgn0034901 | CG11300  | CG11300                          | 2.78 | 0.00 |
| FBgn0010228 | HmgZ     | HMG protein Z                    | 2.78 | 0.00 |
| FBgn0032682 | CG10176  | CG10176                          | 2.76 | 0.00 |
| FBgn0038037 | Cyp9f2   | Cyp9f2                           | 2.74 | 0.00 |
| FBgn0014865 | Mtk      | Metchnikowin                     | 2.74 | 0.00 |
| FBgn0052405 | CG32405  | CG32405                          | 2.74 | 0.00 |
| FBgn0033875 | CG6357   | CG6357                           | 2.74 | 0.00 |
| FBgn0033901 | O-fut1   | O-fucosyltransferase 1           | 2.74 | 0.00 |
| FBgn0011260 | Sema-2a  | Sema-2a                          | 2.74 | 0.00 |
| FBgn0035806 | PGRP-SD  | PGRP-SD                          | 2.73 | 0.00 |

|             |         |                                         |      |      |
|-------------|---------|-----------------------------------------|------|------|
| FBgn0032400 | CG6770  | CG6770                                  | 2.73 | 0.00 |
| FBgn0001257 | ImpL2   | Ecdysone-inducible gene L2              | 2.73 | 0.00 |
| FBgn0037810 | sle     | slender lobes                           | 2.71 | 0.00 |
| FBgn0037127 | CG14566 | CG14566                                 | 2.71 | 0.00 |
| FBgn0036556 | CG5830  | CG5830                                  | 2.70 | 0.00 |
| FBgn0027108 | inx2    | innexin 2                               | 2.70 | 0.00 |
| FBgn0051103 | CG31103 | CG31103                                 | 2.69 | 0.00 |
| FBgn0030685 | Graf    | Graf                                    | 2.68 | 0.00 |
| FBgn0022893 | Df31    | Decondensation factor 31                | 2.68 | 0.00 |
| FBgn0039241 | CG11089 | CG11089                                 | 2.67 | 0.00 |
| FBgn0001197 | His2Av  | Histone H2A variant                     | 2.67 | 0.00 |
| FBgn0041094 | scyl    | scylla                                  | 2.67 | 0.00 |
| FBgn0038074 | CG6188  | CG6188                                  | 2.67 | 0.00 |
| FBgn0038053 | CG18549 | CG18549                                 | 2.67 | 0.00 |
| FBgn0026620 | tacc    | transforming acidic coiled-coil protein | 2.66 | 0.00 |
| FBgn0004646 | ogre    | optic ganglion reduced                  | 2.65 | 0.00 |
| FBgn0013997 | Nrx-IV  | Neurexin IV                             | 2.63 | 0.00 |
| FBgn0031937 | CG13795 | CG13795                                 | 2.63 | 0.00 |
| FBgn0031250 | Ent1    | Equilibrative nucleoside transporter 1  | 2.63 | 0.00 |
| FBgn0052672 | Atg8a   | Autophagy-specific gene 8a              | 2.63 | 0.00 |
| FBgn0002440 | l(3)mbn | lethal (3) malignant blood neoplasm     | 2.62 | 0.00 |
| FBgn0030876 | CG6762  | CG6762                                  | 2.62 | 0.00 |
| FBgn0053047 | CG11714 | CG11714                                 | 2.61 | 0.00 |
| FBgn0040222 | fne     | found in neurons                        | 2.61 | 0.00 |
| FBgn0035290 | CG1887  | CG1887                                  | 2.60 | 0.00 |
| FBgn0035680 | loj     | logjam                                  | 2.60 | 0.00 |
| FBgn0035571 | CG12493 | CG12493                                 | 2.59 | 0.00 |
| FBgn0005626 | ple     | pale                                    | 2.59 | 0.00 |
| FBgn0030734 | CG9911  | CG9911                                  | 2.58 | 0.00 |
| FBgn0034429 | CG18607 | CG18607                                 | 2.57 | 0.01 |
| FBgn0038366 | CG4576  | CG4576                                  | 2.57 | 0.00 |
| FBgn0039172 | CG5677  | CG5677                                  | 2.57 | 0.00 |
| FBgn0032669 | CG15155 | CG15155                                 | 2.57 | 0.00 |
| FBgn0036769 | Tsp74F  | Tetraspanin 74F                         | 2.55 | 0.00 |
| FBgn0011327 | Uch-L3  | Ubiquitin C-terminal hydrolase          | 2.54 | 0.00 |
| FBgn0031914 | CG5973  | CG5973                                  | 2.54 | 0.00 |

|             |         |                                                   |      |      |
|-------------|---------|---------------------------------------------------|------|------|
| FBgn0036128 | CG11801 | CG11801                                           | 2.54 | 0.00 |
| FBgn0035688 | CG10289 | CG10289                                           | 2.54 | 0.00 |
| FBgn0035528 | CG15012 | CG15012                                           | 2.54 | 0.00 |
| FBgn0035877 | CG7083  | CG7083                                            | 2.54 | 0.00 |
| FBgn0028536 | CG15281 | CG15281                                           | 2.53 | 0.00 |
| FBgn0022238 | lolal   | lola like                                         | 2.53 | 0.00 |
| FBgn0036553 | CG17027 | CG17027                                           | 2.53 | 0.00 |
| FBgn0010240 | Lcch3   | Ligand-gated chloride channel homolog 3           | 2.52 | 0.00 |
| FBgn0051075 | CG31075 | CG31075                                           | 2.52 | 0.00 |
| FBgn0015772 | Nak     | Numb-associated kinase                            | 2.51 | 0.00 |
| FBgn0034631 | CG10496 | CG10496                                           | 2.51 | 0.00 |
| FBgn0036525 | CG13451 | CG13451                                           | 2.51 | 0.00 |
| FBgn0032949 | CG3305  | CG3305                                            | 2.51 | 0.00 |
| FBgn0030310 | PGRP-SA | Peptidoglycan recognition protein SA              | 2.51 | 0.00 |
| FBgn0031809 | CG9508  | CG9508                                            | 2.50 | 0.00 |
| FBgn0035423 | CG17737 | CG17737                                           | 2.49 | 0.00 |
| FBgn0034341 | GstE7   | Glutathione S transferase E7                      | 2.49 | 0.00 |
| FBgn0000239 | bur     | burgundy                                          | 2.49 | 0.00 |
| FBgn0013303 | Nca     | Neurocalcin                                       | 2.49 | 0.00 |
| FBgn0038088 | CG10126 | CG10126                                           | 2.48 | 0.00 |
| FBgn0001226 | Hsp27   | Heat shock protein 27                             | 2.48 | 0.00 |
| FBgn0037583 | CG9684  | CG9684                                            | 2.48 | 0.00 |
| FBgn0031558 | CG16704 | CG16704                                           | 2.48 | 0.00 |
| FBgn0003969 | vap     | vacuolar peduncle                                 | 2.47 | 0.00 |
| FBgn0000575 | emc     | extra macrochaetae                                | 2.47 | 0.00 |
| FBgn0004838 | Hrb27C  | Heterogeneous nuclear ribonucleoprotein at 27C    | 2.47 | 0.00 |
| FBgn0038412 | Zip3    | Zinc/iron regulated transporter-related protein 3 | 2.46 | 0.00 |
| FBgn0032223 | GATAd   | GATAd                                             | 2.46 | 0.00 |
| FBgn0030494 | CG15757 | CG15757                                           | 2.46 | 0.00 |
| FBgn0035711 | CG8519  | CG8519                                            | 2.45 | 0.00 |
| FBgn0031873 | Gas41   | Gas41                                             | 2.45 | 0.00 |
| FBgn0050069 | CG30069 | CG30069                                           | 2.45 | 0.00 |
| FBgn0036264 | CG11529 | CG11529                                           | 2.45 | 0.00 |
| FBgn0028546 | Rsu-1   | Ras suppressor-1                                  | 2.45 | 0.00 |
| FBgn0032035 | CG13393 | CG13393                                           | 2.44 | 0.00 |
| FBgn0037150 | CG7133  | CG7133                                            | 2.44 | 0.00 |

|             |          |                             |      |      |
|-------------|----------|-----------------------------|------|------|
| FBgn0034881 | CG10332  | CG10332                     | 2.44 | 0.00 |
| FBgn0003374 | Sgs4     | Salivary gland secretion 4  | 2.44 | 0.01 |
| FBgn0000308 | chic     | chickadee                   | 2.43 | 0.00 |
| FBgn0036394 | CG9040   | CG9040                      | 2.43 | 0.00 |
| FBgn0028939 | CG18146  | CG18146                     | 2.43 | 0.00 |
| FBgn0000541 | E(bx)    | Enhancer of bithorax        | 2.43 | 0.00 |
| FBgn0037728 | CG16817  | CG16817                     | 2.42 | 0.00 |
| FBgn0031936 | CG13794  | CG13794                     | 2.42 | 0.00 |
| FBgn0031470 | CG18557  | CG18557                     | 2.42 | 0.00 |
| FBgn0034786 | CG13531  | CG13531                     | 2.41 | 0.00 |
| FBgn0004889 | tws      | twins                       | 2.41 | 0.00 |
| FBgn0040250 | Ugt86Dj  | Ugt86Dj                     | 2.41 | 0.00 |
| FBgn0033942 | CG10112  | CG10112                     | 2.41 | 0.00 |
| FBgn0038115 | CG7966   | CG7966                      | 2.39 | 0.00 |
| FBgn0053006 | CG18431  | CG18431                     | 2.39 | 0.00 |
| FBgn0035773 | bhr      | bhringi                     | 2.39 | 0.00 |
| FBgn0026192 | par-6    | par-6                       | 2.39 | 0.00 |
| FBgn0004607 | zfh2     | Zn finger homeodomain 2     | 2.39 | 0.00 |
| FBgn0026257 | cav      | caravaggio                  | 2.38 | 0.00 |
| FBgn0024806 | DIP2     | DISCO Interacting Protein 2 | 2.38 | 0.00 |
| FBgn0035985 | CG3672   | CG3672                      | 2.38 | 0.00 |
| FBgn0040373 | CG3038   | CG3038                      | 2.37 | 0.00 |
| FBgn0003345 | sd       | scalloped                   | 2.37 | 0.00 |
| FBgn0026077 | Gasp     | Gasp                        | 2.36 | 0.00 |
| FBgn0051741 | CG31741  | CG31741                     | 2.36 | 0.00 |
| FBgn0003206 | Ras64B   | Ras oncogene at 64B         | 2.35 | 0.00 |
| FBgn0034647 | CG15678  | CG15678                     | 2.35 | 0.00 |
| FBgn0029687 | Vap-33-1 | Vap-33-1                    | 2.35 | 0.00 |
| FBgn0035815 | CG7422   | CG7422                      | 2.34 | 0.00 |
| FBgn0032243 | Klp31E   | Klp31E                      | 2.34 | 0.00 |
| FBgn0040494 | CG7242   | CG7242                      | 2.34 | 0.00 |
| FBgn0027584 | CG4757   | CG4757                      | 2.34 | 0.00 |
| FBgn0037636 | CG9821   | CG9821                      | 2.32 | 0.00 |
| FBgn0036893 | CG9376   | CG9376                      | 2.32 | 0.00 |
| FBgn0036930 | fat2     | fat2                        | 2.32 | 0.00 |
| FBgn0037069 | CG7658   | CG7658                      | 2.32 | 0.05 |

|             |          |                                             |      |      |
|-------------|----------|---------------------------------------------|------|------|
| FBgn0028582 | lqf      | liquid facets                               | 2.32 | 0.00 |
| FBgn0003124 | polo     | polo                                        | 2.31 | 0.00 |
| FBgn0028690 | Rpn5     | Rpn5                                        | 2.31 | 0.00 |
| FBgn0030262 | CG2081   | CG2081                                      | 2.31 | 0.00 |
| FBgn0028411 | Nxt1     | NTF2-related export protein 1               | 2.31 | 0.00 |
| FBgn0030418 | CG4004   | CG4004                                      | 2.30 | 0.00 |
| FBgn0010051 | Itp-r83A | Inositol 1,4,5,-tris-phosphate receptor     | 2.30 | 0.00 |
| FBgn0015796 | Rab8     | Rab-protein 8                               | 2.30 | 0.00 |
| FBgn0037376 | CG2051   | CG2051                                      | 2.30 | 0.00 |
| FBgn0035692 | CG13298  | CG13298                                     | 2.29 | 0.00 |
| FBgn0052238 | CG32238  | CG32238                                     | 2.29 | 0.00 |
| FBgn0039209 | CG13624  | CG13624                                     | 2.29 | 0.00 |
| FBgn0035049 | Mmp1     | Matrix metalloproteinase 1                  | 2.29 | 0.00 |
| FBgn0037357 | sec23    | sec23                                       | 2.28 | 0.00 |
| FBgn0029927 | CG14430  | CG14430                                     | 2.28 | 0.00 |
| FBgn0036773 | CG13698  | CG13698                                     | 2.28 | 0.00 |
| FBgn0029093 | cathD    | cathD                                       | 2.28 | 0.00 |
| FBgn0037770 | Art4     | Arginine methyltransferase 4                | 2.28 | 0.00 |
| FBgn0032689 | CG10413  | CG10413                                     | 2.28 | 0.00 |
| FBgn0015777 | nrv2     | nervana 2                                   | 2.27 | 0.00 |
| FBgn0040950 | CG13990  | CG13990                                     | 2.27 | 0.00 |
| FBgn0002732 | malpha   | E(spl) region transcript malpha             | 2.27 | 0.00 |
| FBgn0035028 | Start1   | Start1                                      | 2.27 | 0.00 |
| FBgn0033008 | gus      | gustavus                                    | 2.27 | 0.00 |
| FBgn0035657 | CG10478  | CG10478                                     | 2.27 | 0.00 |
| FBgn0031597 | CG17612  | CG17612                                     | 2.27 | 0.00 |
| FBgn0026263 | bip1     | bip1                                        | 2.27 | 0.00 |
| FBgn0031268 | CG2813   | CG2813                                      | 2.27 | 0.00 |
| FBgn0033529 | CG17765  | CG17765                                     | 2.26 | 0.00 |
| FBgn0039923 | MED26    | Mediator complex subunit 26                 | 2.26 | 0.00 |
| FBgn0037347 | CG1427   | CG1427                                      | 2.25 | 0.00 |
| FBgn0038100 | Paip2    | polyA-binding protein interacting protein 2 | 2.25 | 0.00 |
| FBgn0004592 | Eig71Ee  | Ecdysone-induced gene 71Ee                  | 2.24 | 0.00 |
| FBgn0042092 | CG13773  | CG13773                                     | 2.24 | 0.00 |
| FBgn0032724 | CG10428  | CG10428                                     | 2.24 | 0.00 |
| FBgn0005655 | mus209   | mutagen-sensitive 209                       | 2.24 | 0.00 |



|             |           |                                   |      |      |
|-------------|-----------|-----------------------------------|------|------|
| FBgn0024921 | Trn       | Transportin                       | 2.24 | 0.00 |
| FBgn0032988 | Tif-IA    | Tif-IA                            | 2.24 | 0.00 |
| FBgn0034440 | CG10073   | CG10073                           | 2.24 | 0.02 |
| FBgn0034082 | CG10734   | CG10734                           | 2.23 | 0.00 |
| FBgn0037344 | CG2926    | CG2926                            | 2.23 | 0.00 |
| FBgn0040466 | Dip2      | Dorsal interacting protein 2      | 2.23 | 0.00 |
| FBgn0034264 | CG10933   | CG10933                           | 2.23 | 0.00 |
| FBgn0035440 | CG14969   | CG14969                           | 2.22 | 0.00 |
| FBgn0040941 | CG15308   | CG15308                           | 2.22 | 0.00 |
| FBgn0034943 | Fmo-1     | Flavin-containing monooxygenase 1 | 2.22 | 0.00 |
| FBgn0039759 | CG9733    | CG9733                            | 2.22 | 0.00 |
| FBgn0027586 | CG5867    | CG5867                            | 2.22 | 0.00 |
| FBgn0002629 | m4        | E(spl) region transcript m4       | 2.21 | 0.00 |
| FBgn0032727 | CG10623   | CG10623                           | 2.21 | 0.00 |
| FBgn0020240 | Mcr       | Macroglobulin complement-related  | 2.21 | 0.00 |
| FBgn0015776 | nrv1      | nervana 1                         | 2.21 | 0.00 |
| FBgn0035550 | CG11349   | CG11349                           | 2.21 | 0.00 |
| FBgn0028980 | tan       | tantalus                          | 2.21 | 0.00 |
| FBgn0015791 | Rab14     | Rab-protein 14                    | 2.21 | 0.00 |
| FBgn0011291 | Taf11     | TBP-associated factor 11          | 2.20 | 0.00 |
| FBgn0025373 | Fpps      | Farnesyl pyrophosphate synthase   | 2.20 | 0.00 |
| FBgn0034756 | Cyp6d2    | Cyp6d2                            | 2.20 | 0.00 |
| FBgn0036062 | CG6685    | CG6685                            | 2.20 | 0.00 |
| FBgn0037680 | CG8121    | CG8121                            | 2.20 | 0.00 |
| FBgn0040324 | Ephrin    | Ephrin                            | 2.20 | 0.00 |
| FBgn0042189 | CG17376   | CG17376                           | 2.20 | 0.00 |
| FBgn0010379 | Akt1      | Akt1                              | 2.20 | 0.00 |
| FBgn0002734 | HLHmdelta | E(spl) region transcript mdelta   | 2.20 | 0.00 |
| FBgn0035038 | CG13588   | CG13588                           | 2.19 | 0.00 |
| FBgn0041710 | yellow-f  | yellow-f                          | 2.19 | 0.00 |
| FBgn0032514 | CG9302    | CG9302                            | 2.19 | 0.00 |
| FBgn0031717 | Oscillin  | Oscillin                          | 2.19 | 0.00 |
| FBgn0039928 | cals      | calsyntenin-1                     | 2.19 | 0.00 |
| FBgn0030828 | CG5162    | CG5162                            | 2.19 | 0.00 |
| FBgn0029167 | Hml       | Hemolectin                        | 2.19 | 0.00 |
| FBgn0035765 | CG8600    | CG8600                            | 2.19 | 0.00 |

|             |          |                                         |      |      |
|-------------|----------|-----------------------------------------|------|------|
| FBgn0028693 | Rpn12    | Rpn12                                   | 2.19 | 0.00 |
| FBgn0035798 | CG7526   | CG7526                                  | 2.18 | 0.00 |
| FBgn0053120 | CG33120  | CG33120                                 | 2.18 | 0.00 |
| FBgn0031044 | CG14211  | CG14211                                 | 2.18 | 0.00 |
| FBgn0032680 | Ntf-2r   | Nuclear transport factor-2-related      | 2.18 | 0.00 |
| FBgn0035679 | CG10467  | CG10467                                 | 2.18 | 0.00 |
| FBgn0037971 | CG10007  | CG10007                                 | 2.17 | 0.00 |
| FBgn0034894 | CG4091   | CG4091                                  | 2.17 | 0.00 |
| FBgn0028472 | dbr      | debra                                   | 2.17 | 0.00 |
| FBgn0036221 | CG11588  | CG11588                                 | 2.17 | 0.00 |
| FBgn0036126 | CG6272   | CG6272                                  | 2.17 | 0.00 |
| FBgn0003891 | tud      | tudor                                   | 2.17 | 0.00 |
| FBgn0034804 | CG3831   | CG3831                                  | 2.17 | 0.00 |
| FBgn0051111 | CG31111  | CG31111                                 | 2.17 | 0.00 |
| FBgn0035398 | CG1869   | CG1869                                  | 2.17 | 0.00 |
| FBgn0040211 | hgo      | homogentisate 1,2-dioxygenase           | 2.16 | 0.00 |
| FBgn0032197 | CG5694   | CG5694                                  | 2.16 | 0.00 |
| FBgn0011253 | gish     | gilgamesh                               | 2.16 | 0.00 |
| FBgn0034290 | CG5773   | CG5773                                  | 2.16 | 0.00 |
| FBgn0027945 | ppl      | pumpless                                | 2.16 | 0.00 |
| FBgn0020257 | ppa      | partner of paired                       | 2.16 | 0.00 |
| FBgn0000259 | CkIIBeta | Casein kinase II beta subunit           | 2.15 | 0.00 |
| FBgn0027865 | Tsp96F   | Tetraspanin 96F                         | 2.15 | 0.00 |
| FBgn0040002 | CG17683  | CG17683                                 | 2.15 | 0.00 |
| FBgn0005612 | Sox14    | Sox box protein 14                      | 2.15 | 0.00 |
| FBgn0032283 | CG7296   | CG7296                                  | 2.15 | 0.00 |
| FBgn0030364 | CG15735  | CG15735                                 | 2.15 | 0.00 |
| FBgn0029838 | CG4666   | CG4666                                  | 2.14 | 0.00 |
| FBgn0039798 | CG11313  | CG11313                                 | 2.14 | 0.00 |
| FBgn0000567 | Eip74EF  | Ecdysone-induced protein 74EF           | 2.14 | 0.00 |
| FBgn0004898 | fd96Cb   | forkhead domain 96Cb                    | 2.14 | 0.00 |
| FBgn0031515 | CG9664   | CG9664                                  | 2.14 | 0.00 |
| FBgn0033641 | Roc2     | Roc2                                    | 2.14 | 0.00 |
| FBgn0052210 | CG32210  | CG32210                                 | 2.13 | 0.00 |
| FBgn0004106 | cdc2     | cdc2                                    | 2.13 | 0.00 |
| FBgn0041184 | Socs36E  | Suppressor of cytokine signaling at 36E | 2.13 | 0.00 |

|             |                |                           |      |      |
|-------------|----------------|---------------------------|------|------|
| FBgn0032132 | CG4382         | CG4382                    | 2.12 | 0.00 |
| FBgn0031992 | CG8498         | CG8498                    | 2.12 | 0.00 |
| FBgn0037794 | CG6254         | CG6254                    | 2.12 | 0.00 |
| FBgn0026404 | Nc             | Nedd2-like caspase        | 2.12 | 0.00 |
| FBgn0011762 | DNApol-alpha50 | DNA polymerase alpha 50kD | 2.12 | 0.00 |
| FBgn0036432 | shd            | shade                     | 2.12 | 0.00 |
| FBgn0031834 | CG13766        | CG13766                   | 2.11 | 0.00 |
| FBgn0025741 | plexA          | plexin A                  | 2.11 | 0.00 |
| FBgn0002741 | Mhc            | Myosin heavy chain        | 2.11 | 0.01 |
| FBgn0039014 | CG6982         | CG6982                    | 2.11 | 0.00 |
| FBgn0034398 | CG15098        | CG15098                   | 2.11 | 0.00 |
| FBgn0052632 | CG32632        | CG32632                   | 2.11 | 0.00 |
| FBgn0027375 | RecQ5          | homolog of RecQ           | 2.11 | 0.00 |
| FBgn0036573 | CG5161         | CG5161                    | 2.11 | 0.00 |
| FBgn0032248 | CG5343         | CG5343                    | 2.11 | 0.00 |
| FBgn0031962 | CG18591        | CG18591                   | 2.11 | 0.00 |
| FBgn0031335 | CG5565         | CG5565                    | 2.11 | 0.00 |
| FBgn0052268 | dro6           | drosomycin-6              | 2.11 | 0.00 |
| FBgn0037121 | Rpb8           | Rpb8                      | 2.11 | 0.00 |
| FBgn0037670 | CG8436         | CG8436                    | 2.10 | 0.00 |
| FBgn0036787 | CG4306         | CG4306                    | 2.10 | 0.00 |
| FBgn0024248 | chico          | chico                     | 2.10 | 0.00 |
| FBgn0032371 | CG4983         | CG4983                    | 2.10 | 0.00 |
| FBgn0029825 | CG12728        | CG12728                   | 2.10 | 0.00 |
| FBgn0039904 | Hcf            | Host cell factor          | 2.10 | 0.00 |
| FBgn0036121 | CG6310         | CG6310                    | 2.10 | 0.00 |
| FBgn0002535 | Lcp4           | Larval cuticle protein 4  | 2.10 | 0.00 |
| FBgn0014879 | Set            | Set                       | 2.10 | 0.00 |
| FBgn0030309 | CG1572         | CG1572                    | 2.10 | 0.00 |
| FBgn0035469 | CG14977        | CG14977                   | 2.09 | 0.00 |
| FBgn0024320 | NPC1           | Niemann-Pick Type C-1     | 2.09 | 0.00 |
| FBgn0035526 | CG1316         | CG1316                    | 2.09 | 0.00 |
| FBgn0034282 | Mapmodulin     | Mapmodulin                | 2.09 | 0.00 |
| FBgn0033731 | CG8515         | CG8515                    | 2.09 | 0.00 |
| FBgn0039959 | CG17514        | CG17514                   | 2.09 | 0.00 |
| FBgn0020616 | SA             | Stromalin                 | 2.09 | 0.00 |

|             |            |                                         |      |      |
|-------------|------------|-----------------------------------------|------|------|
| FBgn0040483 | Caps       | Calcium activated protein for secretion | 2.09 | 0.00 |
| FBgn0039274 | CG11920    | CG11920                                 | 2.08 | 0.00 |
| FBgn0037422 | Osi13      | Osiris 13                               | 2.08 | 0.00 |
| FBgn0032726 | CG10621    | CG10621                                 | 2.08 | 0.00 |
| FBgn0027095 | ARP-like   | ARP-like                                | 2.08 | 0.00 |
| FBgn0011217 | eff        | effete                                  | 2.08 | 0.00 |
| FBgn0030740 | CG9917     | CG9917                                  | 2.08 | 0.00 |
| FBgn0014007 | Ptp69D     | Protein tyrosine phosphatase 69D        | 2.07 | 0.00 |
| FBgn0004419 | me31B      | maternal expression at 31B              | 2.07 | 0.00 |
| FBgn0037960 | mthl5      | methuselah-like 5                       | 2.07 | 0.00 |
| FBgn0030863 | CG8188     | CG8188                                  | 2.07 | 0.00 |
| FBgn0031560 | CG16713    | CG16713                                 | 2.06 | 0.00 |
| FBgn0034742 | CG4294     | CG4294                                  | 2.06 | 0.00 |
| FBgn0028545 | CG8942     | CG8942                                  | 2.06 | 0.00 |
| FBgn0026199 | myoglianin | myoglianin                              | 2.06 | 0.00 |
| FBgn0003498 | sqd        | squid                                   | 2.06 | 0.00 |
| FBgn0000307 | chif       | chiffon                                 | 2.06 | 0.00 |
| FBgn0039695 | CG12068    | CG12068                                 | 2.06 | 0.00 |
| FBgn0023023 | CRMP       | Collapsin Response Mediator Protein     | 2.05 | 0.00 |
| FBgn0034724 | CG3624     | CG3624                                  | 2.05 | 0.00 |
| FBgn0031325 | CG14343    | CG14343                                 | 2.05 | 0.00 |
| FBgn0033020 | CG10396    | CG10396                                 | 2.05 | 0.00 |
| FBgn0040534 | CG11985    | CG11985                                 | 2.05 | 0.00 |
| FBgn0033528 | translin   | translin                                | 2.05 | 0.00 |
| FBgn0035844 | CG13676    | CG13676                                 | 2.05 | 0.00 |
| FBgn0032251 | CG13142    | CG13142                                 | 2.05 | 0.00 |
| FBgn0024989 | CG3777     | CG3777                                  | 2.05 | 0.00 |
| FBgn0025874 | Meics      | Meiotic central spindle                 | 2.05 | 0.00 |
| FBgn0031547 | Sr-CIV     | Scavenger receptor class C, type IV     | 2.05 | 0.00 |
| FBgn0032887 | CG33322    | CG33322                                 | 2.05 | 0.00 |
| FBgn0051999 | CG31999    | CG31999                                 | 2.04 | 0.00 |
| FBgn0035289 | CG12026    | CG12026                                 | 2.04 | 0.00 |
| FBgn0037551 | CG7891     | CG7891                                  | 2.04 | 0.00 |
| FBgn0028506 | CG4455     | CG4455                                  | 2.04 | 0.00 |
| FBgn0000565 | Eip71CD    | Ecdysone-induced protein 28/29kD        | 2.04 | 0.00 |
| FBgn0032242 | CG5355     | CG5355                                  | 2.04 | 0.00 |

|             |           |                               |      |      |
|-------------|-----------|-------------------------------|------|------|
| FBgn0024330 | MED6      | Mediator complex subunit 6    | 2.04 | 0.00 |
| FBgn0015393 | hoip      | hoi-polloi                    | 2.04 | 0.00 |
| FBgn0050365 | CG30365   | CG30365                       | 2.04 | 0.00 |
| FBgn0051729 | CG31729   | CG31729                       | 2.03 | 0.00 |
| FBgn0034275 | CG5002    | CG5002                        | 2.03 | 0.00 |
| FBgn0036921 | RhoGDI    | RhoGDI                        | 2.03 | 0.00 |
| FBgn0032755 | CG17344   | CG17344                       | 2.03 | 0.00 |
| FBgn0039113 | CG10217   | CG10217                       | 2.03 | 0.00 |
| FBgn0037575 | Ctr1B     | Copper transporter 1B         | 2.03 | 0.00 |
| FBgn0030398 | CG2555    | CG2555                        | 2.03 | 0.00 |
| FBgn0040371 | CG12470   | CG12470                       | 2.02 | 0.00 |
| FBgn0039671 | CG11470   | CG11470                       | 2.02 | 0.00 |
| FBgn0031961 | CG7102    | CG7102                        | 2.02 | 0.00 |
| FBgn0000634 | Fas1      | Fasciclin 1                   | 2.02 | 0.00 |
| FBgn0033055 | CG7861    | CG7861                        | 2.02 | 0.00 |
| FBgn0053180 | Ranbp16   | Ranbp16                       | 2.02 | 0.00 |
| FBgn0036926 | CG7646    | CG7646                        | 2.02 | 0.00 |
| FBgn0052158 | CG32158   | CG32158                       | 2.02 | 0.00 |
| FBgn0036266 | CG5626    | CG5626                        | 2.01 | 0.00 |
| FBgn0027507 | CG1344    | CG1344                        | 2.01 | 0.00 |
| FBgn0031489 | CG17224   | CG17224                       | 2.01 | 0.00 |
| FBgn0030312 | l(1)G0237 | lethal (1) G0237              | 2.01 | 0.00 |
| FBgn0032495 | CG16820   | CG16820                       | 2.01 | 0.00 |
| FBgn0030286 | CG1657    | CG1657                        | 2.01 | 0.00 |
| FBgn0036018 | CG3335    | CG3335                        | 2.01 | 0.00 |
| FBgn0020415 | ldgf2     | Imaginal disc growth factor 2 | 2.01 | 0.00 |
| FBgn0015229 | glec      | gliolectin                    | 2.01 | 0.00 |
| FBgn0001078 | ftz-f1    | ftz transcription factor 1    | 2.01 | 0.00 |
| FBgn0041191 | Rheb      | Rheb                          | 2.01 | 0.00 |
| FBgn0038489 | CG12265   | CG12265                       | 2.01 | 0.00 |
| FBgn0004629 | Cys       | Cystatin-like                 | 2.00 | 0.00 |
| FBgn0033495 | CG12214   | CG12214                       | 2.00 | 0.00 |
| FBgn0034703 | CG3045    | CG3045                        | 2.00 | 0.00 |
| FBgn0028984 | Spn5      | Serine protease inhibitor 5   | 2.00 | 0.00 |
| FBgn0000422 | Ddc       | Dopa decarboxylase            | 2.00 | 0.00 |
| FBgn0031879 | SP1070    | SP1070                        | 2.00 | 0.00 |

|             |             |                                                  |      |      |
|-------------|-------------|--------------------------------------------------|------|------|
| FBgn0040102 | lectin-24Db | lectin-24Db                                      | 2.00 | 0.00 |
| FBgn0004648 | svr         | silver                                           | 2.00 | 0.00 |
| FBgn0032139 | CG13116     | CG13116                                          | 2.00 | 0.00 |
| FBgn0035110 | thoc7       | thoc7                                            | 1.99 | 0.00 |
| FBgn0000229 | bsk         | basket                                           | 1.99 | 0.00 |
| FBgn0029002 | miple2      | miple2                                           | 1.99 | 0.00 |
| FBgn0032421 | CG17218     | CG17218                                          | 1.99 | 0.00 |
| FBgn0001491 | l(1)10Bb    | lethal (1) 10Bb                                  | 1.99 | 0.00 |
| FBgn0030693 | CG8974      | CG8974                                           | 1.99 | 0.00 |
| FBgn0034614 | CG9752      | CG9752                                           | 1.98 | 0.00 |
| FBgn0037336 | CG2519      | CG2519                                           | 1.98 | 0.00 |
| FBgn0037755 | CG12945     | CG12945                                          | 1.98 | 0.00 |
| FBgn0031326 | CG5156      | CG5156                                           | 1.98 | 0.00 |
| FBgn0028734 | Fmr1        | Fmr1                                             | 1.98 | 0.00 |
| FBgn0037338 | Snm1        | Snm1                                             | 1.98 | 0.00 |
| FBgn0035817 | CG7409      | CG7409                                           | 1.98 | 0.00 |
| FBgn0036967 | CG6597      | CG6597                                           | 1.98 | 0.00 |
| FBgn0001168 | h           | hairy                                            | 1.98 | 0.00 |
| FBgn0038242 | CG14852     | CG14852                                          | 1.98 | 0.00 |
| FBgn0031453 | CG9894      | CG9894                                           | 1.98 | 0.00 |
| FBgn0035710 | SP1173      | SP1173                                           | 1.98 | 0.00 |
| FBgn0032699 | CG10383     | CG10383                                          | 1.97 | 0.00 |
| FBgn0031689 | Cyp28d1     | Cyp28d1                                          | 1.97 | 0.00 |
| FBgn0037697 | CG9363      | CG9363                                           | 1.97 | 0.00 |
| FBgn0026371 | SAK         | SAK                                              | 1.97 | 0.00 |
| FBgn0025809 | Paf-AHalpha | Platelet-activating factor acetylhydrolase alpha | 1.97 | 0.00 |
| FBgn0051948 | CG31948     | CG31948                                          | 1.97 | 0.00 |
| FBgn0040252 | Ugt86Dh     | Ugt86Dh                                          | 1.97 | 0.00 |
| FBgn0052081 | CG32081     | CG32081                                          | 1.97 | 0.00 |
| FBgn0035427 | CG14959     | CG14959                                          | 1.97 | 0.00 |
| FBgn0034554 | CG15227     | CG15227                                          | 1.97 | 0.02 |
| FBgn0013746 | alien       | alien                                            | 1.97 | 0.00 |
| FBgn0036715 | Cad74A      | Cad74A                                           | 1.97 | 0.00 |
| FBgn0032521 | CG7110      | CG7110                                           | 1.96 | 0.00 |
| FBgn0051510 | CG31510     | CG31510                                          | 1.96 | 0.00 |
| FBgn0000053 | ade3        | adenosine 3                                      | 1.96 | 0.00 |

|             |         |                                      |      |      |
|-------------|---------|--------------------------------------|------|------|
| FBgn0041160 | comm2   | comm2                                | 1.96 | 0.00 |
| FBgn0032000 | CG8372  | CG8372                               | 1.96 | 0.00 |
| FBgn0037378 | CG2046  | CG2046                               | 1.96 | 0.00 |
| FBgn0035839 | CG7550  | CG7550                               | 1.96 | 0.00 |
| FBgn0032691 | CG10414 | CG10414                              | 1.96 | 0.00 |
| FBgn0039135 | CG13603 | CG13603                              | 1.96 | 0.00 |
| FBgn0028704 | Nckx30C | Nckx30C                              | 1.95 | 0.00 |
| FBgn0032880 | CG9318  | CG9318                               | 1.95 | 0.00 |
| FBgn0029764 | CG3249  | CG3249                               | 1.95 | 0.00 |
| FBgn0037128 | CG14572 | CG14572                              | 1.95 | 0.00 |
| FBgn0036295 | sti     | sticky                               | 1.95 | 0.00 |
| FBgn0033301 | CG12780 | CG12780                              | 1.95 | 0.00 |
| FBgn0053096 | CG33096 | CG33096                              | 1.95 | 0.00 |
| FBgn0037360 | CG2182  | CG2182                               | 1.95 | 0.00 |
| FBgn0028406 | Rep4    | Rep4                                 | 1.95 | 0.00 |
| FBgn0004432 | Cyp1    | Cyclophilin 1                        | 1.94 | 0.00 |
| FBgn0029506 | Tsp42Ee | Tetraspanin 42Ee                     | 1.94 | 0.00 |
| FBgn0030703 | CG9066  | CG9066                               | 1.94 | 0.00 |
| FBgn0032685 | CG10211 | CG10211                              | 1.94 | 0.00 |
| FBgn0039265 | CG11790 | CG11790                              | 1.94 | 0.00 |
| FBgn0035608 | CG10630 | CG10630                              | 1.94 | 0.00 |
| FBgn0036959 | CG6951  | CG6951                               | 1.94 | 0.00 |
| FBgn0036911 | Fibp    | Fibp                                 | 1.94 | 0.00 |
| FBgn0035976 | PGRP-LC | Peptidoglycan recognition protein LC | 1.94 | 0.00 |
| FBgn0015795 | Rab7    | Rab-protein 7                        | 1.94 | 0.00 |
| FBgn0022347 | CG11971 | CG11971                              | 1.94 | 0.00 |
| FBgn0040701 | CG13714 | CG13714                              | 1.94 | 0.00 |
| FBgn0051751 | CG31751 | CG31751                              | 1.94 | 0.00 |
| FBgn0032624 | CG6304  | CG6304                               | 1.93 | 0.00 |
| FBgn0010452 | trn     | tartan                               | 1.93 | 0.00 |
| FBgn0034179 | CG6805  | CG6805                               | 1.93 | 0.00 |
| FBgn0052084 | CG33269 | CG33269                              | 1.93 | 0.00 |
| FBgn0035393 | CG16753 | CG16753                              | 1.93 | 0.00 |
| FBgn0034791 | CG3501  | CG3501                               | 1.93 | 0.00 |
| FBgn0038243 | CG8066  | CG8066                               | 1.93 | 0.00 |
| FBgn0050437 | CG30437 | CG30437                              | 1.93 | 0.00 |

|             |           |                                                 |      |      |
|-------------|-----------|-------------------------------------------------|------|------|
| FBgn0034668 | Fili      | Fish-lips                                       | 1.93 | 0.00 |
| FBgn0039532 | Mtl       | Mig-2-like                                      | 1.93 | 0.00 |
| FBgn0002735 | HLHmgamma | E(spl) region transcript mgamma                 | 1.92 | 0.00 |
| FBgn0038471 | CG5220    | CG5220                                          | 1.92 | 0.00 |
| FBgn0030306 | CG1751    | CG1751                                          | 1.92 | 0.00 |
| FBgn0031571 | CG3921    | CG3921                                          | 1.92 | 0.00 |
| FBgn0037552 | CG7800    | CG7800                                          | 1.92 | 0.00 |
| FBgn0034797 | nahoda    | nahoda                                          | 1.92 | 0.00 |
| FBgn0010435 | emp       | epithelial membrane protein                     | 1.92 | 0.00 |
| FBgn0024698 | cpsf      | cleavage and polyadenylation specificity factor | 1.92 | 0.00 |
| FBgn0033170 | sPLA2     | secretory Phospholipase A2                      | 1.91 | 0.00 |
| FBgn0025781 | cdc16     | cdc16                                           | 1.91 | 0.00 |
| FBgn0032194 | CG4901    | CG4901                                          | 1.91 | 0.00 |
| FBgn0032305 | CG6700    | CG6700                                          | 1.91 | 0.00 |
| FBgn0001225 | Hsp26     | Heat shock protein 26                           | 1.91 | 0.00 |
| FBgn0031529 | CG9662    | CG9662                                          | 1.91 | 0.00 |
| FBgn0039330 | CG11909   | CG11909                                         | 1.91 | 0.02 |
| FBgn0031361 | CG17652   | CG17652                                         | 1.91 | 0.00 |
| FBgn0020224 | Cbl       | Cbl                                             | 1.91 | 0.00 |
| FBgn0030994 | CG14193   | CG14193                                         | 1.91 | 0.00 |
| FBgn0032214 | CG4968    | CG4968                                          | 1.91 | 0.00 |
| FBgn0038525 | CG14329   | CG14329                                         | 1.91 | 0.00 |
| FBgn0030429 | CG4661    | CG4661                                          | 1.91 | 0.00 |
| FBgn0003292 | rt        | rotated abdomen                                 | 1.90 | 0.00 |
| FBgn0033028 | CG11665   | CG11665                                         | 1.90 | 0.00 |
| FBgn0037560 | CG18228   | CG18228                                         | 1.90 | 0.00 |
| FBgn0031822 | CG9548    | CG9548                                          | 1.90 | 0.00 |
| FBgn0038225 | CG8489    | CG8489                                          | 1.90 | 0.00 |
| FBgn0004624 | CaMKII    | Calcium/calmodulin-dependent protein kinase II  | 1.90 | 0.00 |
| FBgn0036931 | CG14183   | CG14183                                         | 1.90 | 0.00 |
| FBgn0028510 | CG15261   | CG15261                                         | 1.90 | 0.00 |
| FBgn0038947 | sar1      | sar1                                            | 1.90 | 0.00 |
| FBgn0000261 | Cat       | Catalase                                        | 1.90 | 0.00 |
| FBgn0036538 | CG15715   | CG15715                                         | 1.90 | 0.00 |
| FBgn0035523 | CG1311    | CG1311                                          | 1.90 | 0.00 |
| FBgn0011722 | Tig       | Tiggrin                                         | 1.90 | 0.00 |



|             |          |                                          |      |      |
|-------------|----------|------------------------------------------|------|------|
| FBgn0036565 | CG5235   | CG5235                                   | 1.90 | 0.00 |
| FBgn0015924 | crq      | croquemort                               | 1.90 | 0.00 |
| FBgn0025821 | l-t      | inhibitor-t                              | 1.90 | 0.00 |
| FBgn0001229 | Hsp67Bc  | Heat shock gene 67Bc                     | 1.90 | 0.00 |
| FBgn0040512 | zetaCOP  | zetaCOP                                  | 1.90 | 0.00 |
| FBgn0032193 | CG5727   | CG5727                                   | 1.89 | 0.00 |
| FBgn0037468 | CG1943   | CG1943                                   | 1.89 | 0.00 |
| FBgn0016724 | RfaBp    | Retinoid- and fatty-acid binding protein | 1.89 | 0.00 |
| FBgn0030334 | Karl     | Karl                                     | 1.89 | 0.00 |
| FBgn0037721 | CG9427   | CG9427                                   | 1.89 | 0.00 |
| FBgn0036008 | CG3408   | CG3408                                   | 1.89 | 0.00 |
| FBgn0032601 | yellow-b | yellow-b                                 | 1.89 | 0.00 |
| FBgn0039281 | CG11847  | CG11847                                  | 1.89 | 0.00 |
| FBgn0037082 | CG5664   | CG5664                                   | 1.89 | 0.00 |
| FBgn0033468 | CG1418   | CG1418                                   | 1.89 | 0.00 |
| FBgn0037067 | CG11310  | CG11310                                  | 1.89 | 0.00 |
| FBgn0033683 | CG18343  | CG18343                                  | 1.89 | 0.00 |
| FBgn0035726 | CG9953   | CG9953                                   | 1.88 | 0.00 |
| FBgn0030657 | CG15645  | CG15645                                  | 1.88 | 0.00 |
| FBgn0028886 | CG15279  | CG15279                                  | 1.88 | 0.00 |
| FBgn0035830 | CG8209   | CG8209                                   | 1.88 | 0.00 |
| FBgn0032358 | CG4851   | CG4851                                   | 1.88 | 0.00 |
| FBgn0038453 | CG10326  | CG10326                                  | 1.88 | 0.00 |
| FBgn0036843 | CG6812   | CG6812                                   | 1.88 | 0.00 |
| FBgn0036830 | CG14077  | CG14077                                  | 1.88 | 0.00 |
| FBgn0035800 | CG7716   | CG7716                                   | 1.88 | 0.00 |
| FBgn0038978 | CG7045   | CG7045                                   | 1.88 | 0.00 |
| FBgn0037288 | CG14661  | CG14661                                  | 1.88 | 0.00 |
| FBgn0032200 | CG5676   | CG5676                                   | 1.88 | 0.00 |
| FBgn0036942 | CG7328   | CG7328                                   | 1.88 | 0.00 |
| FBgn0032805 | CG10337  | CG10337                                  | 1.88 | 0.00 |
| FBgn0037534 | CG2781   | CG2781                                   | 1.88 | 0.00 |
| FBgn0010894 | sinu     | sinuous                                  | 1.88 | 0.00 |
| FBgn0038966 | CG13848  | CG13848                                  | 1.87 | 0.00 |
| FBgn0037518 | CG2641   | CG2641                                   | 1.87 | 0.00 |
| FBgn0030183 | CG15309  | CG15309                                  | 1.87 | 0.00 |

|             |              |                              |      |      |
|-------------|--------------|------------------------------|------|------|
| FBgn0036248 | CG17153      | CG17153                      | 1.87 | 0.00 |
| FBgn0031986 | CG8673       | CG8673                       | 1.87 | 0.00 |
| FBgn0032285 | CG17108      | CG17108                      | 1.87 | 0.00 |
| FBgn0031581 | CG10039      | CG10039                      | 1.87 | 0.00 |
| FBgn0028990 | Spn27A       | Serpin-27A                   | 1.87 | 0.00 |
| FBgn0052372 | CG32372      | CG32372                      | 1.87 | 0.00 |
| FBgn0040827 | CG13315      | CG13315                      | 1.87 | 0.00 |
| FBgn0040519 | CG15219      | CG15219                      | 1.87 | 0.00 |
| FBgn0038359 | CG5614       | CG5614                       | 1.87 | 0.00 |
| FBgn0030341 | CG1967       | CG1967                       | 1.87 | 0.00 |
| FBgn0004581 | bgn          | benign gonial cell neoplasm  | 1.87 | 0.00 |
| FBgn0036005 | CG3428       | CG3428                       | 1.87 | 0.00 |
| FBgn0039268 | CG11819      | CG11819                      | 1.87 | 0.00 |
| FBgn0034726 | Mes4         | Mes4                         | 1.87 | 0.00 |
| FBgn0022942 | Cbp80        | cap binding protein 80       | 1.87 | 0.00 |
| FBgn0035132 | mthl10       | methuselah-like 10           | 1.87 | 0.00 |
| FBgn0050080 | CG30080      | CG30080                      | 1.87 | 0.00 |
| FBgn0035983 | CG4080       | CG4080                       | 1.87 | 0.00 |
| FBgn0030247 | CG15208      | CG15208                      | 1.87 | 0.00 |
| FBgn0022213 | Cas          | CAS/CSE1 segregation protein | 1.87 | 0.00 |
| FBgn0012066 | DNApol-delta | DNA-polymerase-delta         | 1.87 | 0.00 |
| FBgn0032899 | CG9338       | CG9338                       | 1.86 | 0.00 |
| FBgn0039690 | CG1969       | CG1969                       | 1.86 | 0.00 |
| FBgn0035904 | CG6776       | CG6776                       | 1.86 | 0.00 |
| FBgn0001104 | G-ialpha65A  | G protein alpha subunit 65A  | 1.86 | 0.00 |
| FBgn0036848 | CG10424      | CG10424                      | 1.86 | 0.00 |
| FBgn0036014 | CG3222       | CG3222                       | 1.86 | 0.00 |
| FBgn0031974 | CG12560      | CG12560                      | 1.86 | 0.00 |
| FBgn0010348 | Arf79F       | ADP ribosylation factor 79F  | 1.85 | 0.00 |
| FBgn0028872 | CG18095      | CG18095                      | 1.85 | 0.00 |
| FBgn0033015 | d4           | d4                           | 1.85 | 0.00 |
| FBgn0013981 | His4r        | Histone H4 replacement       | 1.85 | 0.00 |
| FBgn0026084 | cib          | ciboulot                     | 1.85 | 0.00 |
| FBgn0032723 | CG18397      | CG18397                      | 1.85 | 0.00 |
| FBgn0031892 | CG13783      | CG13783                      | 1.85 | 0.00 |
| FBgn0052016 | CG32016      | CG32016                      | 1.85 | 0.00 |

|             |            |                                          |      |      |
|-------------|------------|------------------------------------------|------|------|
| FBgn0000547 | ed         | echinoid                                 | 1.85 | 0.00 |
| FBgn0029121 | Sras       | severas                                  | 1.85 | 0.00 |
| FBgn0035496 | CG14990    | CG14990                                  | 1.85 | 0.00 |
| FBgn0030852 | CG8316     | CG8316                                   | 1.85 | 0.00 |
| FBgn0032253 | CG5322     | CG5322                                   | 1.85 | 0.00 |
| FBgn0036309 | CG10971    | CG10971                                  | 1.85 | 0.00 |
| FBgn0037834 | Art1       | Arginine methyltransferase 1             | 1.85 | 0.00 |
| FBgn0038151 | yellow-e2  | yellow-e2                                | 1.84 | 0.00 |
| FBgn0037674 | Vps16A     | Vps16A                                   | 1.84 | 0.00 |
| FBgn0027660 | blot       | bloated tubules                          | 1.84 | 0.00 |
| FBgn0040508 | ACXC       | ACXC                                     | 1.84 | 0.00 |
| FBgn0032615 | CG6012     | CG6012                                   | 1.84 | 0.00 |
| FBgn0031033 | CG14219    | CG14219                                  | 1.84 | 0.00 |
| FBgn0034342 | GstE8      | Glutathione S transferase E8             | 1.84 | 0.00 |
| FBgn0035871 | CG7188     | CG7188                                   | 1.84 | 0.00 |
| FBgn0032124 | CG17855    | CG17855                                  | 1.84 | 0.00 |
| FBgn0051935 | CG31935    | CG31935                                  | 1.84 | 0.00 |
| FBgn0033013 | Nipped-A   | Nipped-A                                 | 1.84 | 0.00 |
| FBgn0004436 | UbcD6      | Ubiquitin conjugating enzyme             | 1.84 | 0.00 |
| FBgn0002791 | mr         | morula                                   | 1.84 | 0.00 |
| FBgn0040009 | CG17490    | CG17490                                  | 1.83 | 0.00 |
| FBgn0050344 | CG30344    | CG30344                                  | 1.83 | 0.00 |
| FBgn0039332 | CG11910    | CG11910                                  | 1.83 | 0.00 |
| FBgn0039370 | CG4956     | CG4956                                   | 1.83 | 0.00 |
| FBgn0032059 | CG9296     | CG9296                                   | 1.83 | 0.00 |
| FBgn0031676 | CG14040    | CG14040                                  | 1.83 | 0.00 |
| FBgn0038294 | Zeelin1    | Zeelin1                                  | 1.83 | 0.00 |
| FBgn0030711 | CG8928     | CG8928                                   | 1.83 | 0.00 |
| FBgn0040323 | GNBP1      | Gram-negative bacteria binding protein 1 | 1.83 | 0.00 |
| FBgn0036509 | CG7739     | CG7739                                   | 1.83 | 0.00 |
| FBgn0001105 | Gbeta13F   | G protein beta-subunit 13F               | 1.83 | 0.00 |
| FBgn0020416 | ldgf1      | Imaginal disc growth factor 1            | 1.83 | 0.00 |
| FBgn0003607 | Su(var)205 | Suppressor of variegation 205            | 1.83 | 0.00 |
| FBgn0035869 | CG7066     | CG7066                                   | 1.83 | 0.00 |
| FBgn0026869 | Thd1       | Thd1                                     | 1.83 | 0.00 |
| FBgn0024811 | Crk        | Crk                                      | 1.83 | 0.00 |

|             |               |                             |      |      |
|-------------|---------------|-----------------------------|------|------|
| FBgn0033439 | CG1773        | CG1773                      | 1.82 | 0.01 |
| FBgn0035426 | CG12078       | CG12078                     | 1.82 | 0.00 |
| FBgn0037359 | MED27         | Mediator complex subunit 27 | 1.82 | 0.00 |
| FBgn0030171 | CG2989        | CG2989                      | 1.82 | 0.00 |
| FBgn0002914 | Myb           | Myb oncogene-like           | 1.82 | 0.00 |
| FBgn0040011 | CG17494       | CG17494                     | 1.82 | 0.00 |
| FBgn0035842 | CG7504        | CG7504                      | 1.82 | 0.00 |
| FBgn0039293 | CG11851       | CG11851                     | 1.82 | 0.00 |
| FBgn0028894 | CG5869        | CG5869                      | 1.82 | 0.00 |
| FBgn0034140 | CG8317        | CG8317                      | 1.82 | 0.00 |
| FBgn0039077 | CG17380       | CG17380                     | 1.82 | 0.00 |
| FBgn0004636 | R             | Roughened                   | 1.82 | 0.00 |
| FBgn0037677 | CG12951       | CG12951                     | 1.82 | 0.00 |
| FBgn0036147 | CG6199        | CG6199                      | 1.82 | 0.00 |
| FBgn0032906 | CG9273        | CG9273                      | 1.82 | 0.00 |
| FBgn0004373 | fwd           | four wheel drive            | 1.81 | 0.00 |
| FBgn0041205 | key           | kenny                       | 1.81 | 0.00 |
| FBgn0028913 | CG3473        | CG3473                      | 1.81 | 0.00 |
| FBgn0030421 | CG3812        | CG3812                      | 1.81 | 0.00 |
| FBgn0053070 | CG14425       | CG14425                     | 1.81 | 0.00 |
| FBgn0022959 | yps           | epsilon schachtel           | 1.81 | 0.00 |
| FBgn0039800 | CG11314       | CG11314                     | 1.81 | 0.00 |
| FBgn0038250 | CG3505        | CG3505                      | 1.81 | 0.00 |
| FBgn0033031 | CG8245        | CG8245                      | 1.81 | 0.00 |
| FBgn0034729 | CG10344       | CG10344                     | 1.81 | 0.00 |
| FBgn0061209 | His2B:CG17949 | His2B:CG17949               | 1.81 | 0.00 |
| FBgn0037537 | CG2767        | CG2767                      | 1.81 | 0.00 |
| FBgn0030985 | Obp18a        | Odorant-binding protein 18a | 1.81 | 0.00 |
| FBgn0035866 | CG7197        | CG7197                      | 1.81 | 0.00 |
| FBgn0051100 | CG31100       | CG31100                     | 1.81 | 0.00 |
| FBgn0035073 | CG16896       | CG16896                     | 1.81 | 0.00 |
| FBgn0035434 | dro5          | drosomycin-5                | 1.81 | 0.00 |
| FBgn0030611 | CG15027       | CG15027                     | 1.81 | 0.00 |
| FBgn0000591 | E(spl)        | Enhancer of split           | 1.81 | 0.00 |
| FBgn0030726 | CG9216        | CG9216                      | 1.81 | 0.00 |
| FBgn0025366 | Ip259         | Intronic Protein 259        | 1.81 | 0.00 |

|             |              |                                  |      |      |
|-------------|--------------|----------------------------------|------|------|
| FBgn0051367 | CG31367      | CG31367                          | 1.81 | 0.00 |
| FBgn0035998 | CG3437       | CG3437                           | 1.81 | 0.00 |
| FBgn0035725 | CG18156      | CG18156                          | 1.81 | 0.00 |
| FBgn0016675 | Lectin-galC1 | Galactose-specific C-type lectin | 1.80 | 0.00 |
| FBgn0031032 | CG14204      | CG14204                          | 1.80 | 0.00 |
| FBgn0038149 | CG9796       | CG9796                           | 1.80 | 0.00 |
| FBgn0040295 | Ogt          | O-glycosyltransferase            | 1.80 | 0.00 |
| FBgn0011817 | nmo          | nemo                             | 1.80 | 0.00 |
| FBgn0030969 | CG7288       | CG7288                           | 1.80 | 0.00 |
| FBgn0011571 | caz          | cabeza                           | 1.80 | 0.00 |
| FBgn0040852 | CG15197      | CG15197                          | 1.80 | 0.00 |
| FBgn0003041 | pbl          | pebble                           | 1.80 | 0.00 |
| FBgn0036194 | CG11652      | CG11652                          | 1.80 | 0.00 |
| FBgn0000464 | Lar          | Leukocyte-antigen-related-like   | 1.80 | 0.00 |
| FBgn0058016 | CG17493      | CG17493                          | 1.79 | 0.00 |
| FBgn0037730 | CG9444       | CG9444                           | 1.79 | 0.00 |
| FBgn0036932 | CG14184      | CG14184                          | 1.79 | 0.00 |
| FBgn0033021 | CG10417      | CG10417                          | 1.79 | 0.00 |
| FBgn0036710 | CG6479       | CG6479                           | 1.79 | 0.00 |
| FBgn0036499 | CG7276       | CG7276                           | 1.79 | 0.00 |
| FBgn0036550 | CG17026      | CG17026                          | 1.79 | 0.00 |
| FBgn0030698 | Aats-arg     | Arginyl-tRNA synthetase          | 1.79 | 0.00 |
| FBgn0010406 | RNaseX25     | Ribonuclease X25                 | 1.79 | 0.00 |
| FBgn0039518 | CG13978      | CG13978                          | 1.79 | 0.00 |
| FBgn0014469 | Cyp4e2       | Cytochrome P450-4e2              | 1.79 | 0.00 |
| FBgn0052590 | CG32590      | CG32590                          | 1.79 | 0.00 |
| FBgn0038110 | CG8031       | CG8031                           | 1.79 | 0.00 |
| FBgn0011570 | cpb          | capping protein beta             | 1.79 | 0.00 |
| FBgn0030870 | CG6398       | CG6398                           | 1.79 | 0.00 |
| FBgn0010341 | Cdc42        | Cdc42                            | 1.79 | 0.00 |
| FBgn0031351 | CG14352      | CG14352                          | 1.79 | 0.00 |
| FBgn0030653 | CG7860       | CG7860                           | 1.79 | 0.00 |
| FBgn0052694 | CG32694      | CG32694                          | 1.79 | 0.00 |
| FBgn0036454 | CG17839      | CG17839                          | 1.79 | 0.00 |
| FBgn0031186 | CG14614      | CG14614                          | 1.78 | 0.00 |
| FBgn0031908 | CG5177       | CG5177                           | 1.78 | 0.00 |

|             |             |                                      |      |      |
|-------------|-------------|--------------------------------------|------|------|
| FBgn0032956 | cul-2       | cul-2                                | 1.78 | 0.00 |
| FBgn0035080 | pain        | painless                             | 1.78 | 0.00 |
| FBgn0025355 | SuUR        | Suppressor of Under-Replication      | 1.78 | 0.00 |
| FBgn0024222 | ird5        | immune response deficient 5          | 1.78 | 0.00 |
| FBgn0003321 | sbr         | small bristles                       | 1.78 | 0.00 |
| FBgn0030029 | CG15343     | CG15343                              | 1.78 | 0.00 |
| FBgn0036465 | CG11552     | CG11552                              | 1.78 | 0.00 |
| FBgn0051108 | CG31108     | CG31108                              | 1.78 | 0.00 |
| FBgn0036898 | Oat         | Ornithine aminotransferase precursor | 1.78 | 0.01 |
| FBgn0037719 | bocksbeutel | bocksbeutel                          | 1.78 | 0.00 |
| FBgn0004513 | Mdr65       | Multiple drug resistance 65          | 1.78 | 0.00 |
| FBgn0035151 | CG17129     | CG17129                              | 1.78 | 0.00 |
| FBgn0034008 | CG8152      | CG8152                               | 1.78 | 0.00 |
| FBgn0036029 | CG16719     | CG16719                              | 1.78 | 0.00 |
| FBgn0038198 | CG3153      | CG3153                               | 1.77 | 0.00 |
| FBgn0028371 | jbug        | jitterbug                            | 1.77 | 0.00 |
| FBgn0030307 | CG33235     | CG33235                              | 1.77 | 0.00 |
| FBgn0033686 | CG12367     | CG12367                              | 1.77 | 0.00 |
| FBgn0030136 | RpS28b      | Ribosomal protein S28b               | 1.77 | 0.00 |
| FBgn0022986 | qkr58E-1    | quaking related 58E-1                | 1.77 | 0.00 |
| FBgn0035097 | CG13405     | CG13405                              | 1.77 | 0.00 |
| FBgn0029725 | CG2871      | CG2871                               | 1.77 | 0.00 |
| FBgn0034663 | CG4363      | CG4363                               | 1.77 | 0.00 |
| FBgn0039955 | CG41099     | CG41099                              | 1.77 | 0.00 |
| FBgn0032864 | CG2493      | CG2493                               | 1.77 | 0.00 |
| FBgn0002780 | mod         | modulo                               | 1.77 | 0.00 |
| FBgn0032590 | CG4631      | CG4631                               | 1.77 | 0.00 |
| FBgn0023076 | Clk         | Clock                                | 1.77 | 0.00 |
| FBgn0032599 | CG13277     | CG13277                              | 1.77 | 0.00 |
| FBgn0002506 | did         | diminished discs                     | 1.77 | 0.00 |
| FBgn0034307 | CG10914     | CG10914                              | 1.77 | 0.00 |
| FBgn0011569 | can         | cannonball                           | 1.77 | 0.00 |
| FBgn0032491 | CG16815     | CG16815                              | 1.77 | 0.00 |
| FBgn0030376 | CG2750      | CG2750                               | 1.77 | 0.00 |
| FBgn0040057 | eIF-4B      | Eukaryotic initiation factor 4B      | 1.76 | 0.00 |
| FBgn0030744 | CG9992      | CG9992                               | 1.76 | 0.00 |

|             |             |                                                    |      |      |
|-------------|-------------|----------------------------------------------------|------|------|
| FBgn0028535 | CG4140      | CG4140                                             | 1.76 | 0.00 |
| FBgn0037860 | CG6629      | CG6629                                             | 1.76 | 0.00 |
| FBgn0035158 | CG13895     | CG13895                                            | 1.76 | 0.00 |
| FBgn0003277 | RplI215     | RNA polymerase II 215kD subunit                    | 1.76 | 0.00 |
| FBgn0035838 | CG7942      | CG7942                                             | 1.76 | 0.00 |
| FBgn0038511 | CG5873      | CG5873                                             | 1.76 | 0.00 |
| FBgn0030782 | CG18358     | CG18358                                            | 1.76 | 0.00 |
| FBgn0032259 | CG6144      | CG6144                                             | 1.76 | 0.00 |
| FBgn0030854 | CG8289      | CG8289                                             | 1.76 | 0.00 |
| FBgn0000370 | crc         | cryptocephal                                       | 1.76 | 0.00 |
| FBgn0039291 | CG13663     | CG13663                                            | 1.76 | 0.00 |
| FBgn0002521 | pho         | pleiohomeotic                                      | 1.76 | 0.00 |
| FBgn0030694 | CG15602     | CG15602                                            | 1.76 | 0.00 |
| FBgn0011509 | SrpRbeta    | Signal recognition particle receptor beta          | 1.76 | 0.00 |
| FBgn0004176 | gammaTub23C | gamma-Tubulin at 23C                               | 1.76 | 0.00 |
| FBgn0052573 | CG32573     | CG32573                                            | 1.76 | 0.00 |
| FBgn0037669 | CG9740      | CG9740                                             | 1.76 | 0.00 |
| FBgn0037126 | CG14567     | CG14567                                            | 1.75 | 0.00 |
| FBgn0032664 | CG5755      | CG5755                                             | 1.75 | 0.00 |
| FBgn0030699 | CG8578      | CG8578                                             | 1.75 | 0.00 |
| FBgn0037251 | CG9804      | CG9804                                             | 1.75 | 0.00 |
| FBgn0000404 | CycA        | Cyclin A                                           | 1.75 | 0.00 |
| FBgn0030890 | CG7536      | CG7536                                             | 1.75 | 0.00 |
| FBgn0034232 | CG4866      | CG4866                                             | 1.75 | 0.00 |
| FBgn0051990 | CG17768     | CG17768                                            | 1.75 | 0.00 |
| FBgn0032215 | CG5385      | CG5385                                             | 1.75 | 0.00 |
| FBgn0031417 | CG3597      | CG3597                                             | 1.75 | 0.00 |
| FBgn0040551 | CG11686     | CG11686                                            | 1.75 | 0.00 |
| FBgn0011703 | RnrL        | Ribonucleoside diphosphate reductase large subunit | 1.75 | 0.00 |
| FBgn0001123 | G-salpa60A  | G protein salpa 60A                                | 1.75 | 0.00 |
| FBgn0031600 | CG3652      | CG3652                                             | 1.75 | 0.00 |
| FBgn0051624 | CG31624     | CG31624                                            | 1.75 | 0.00 |
| FBgn0032960 | Grp1        | General receptor for phosphoinositides 1           | 1.75 | 0.00 |
| FBgn0031951 | r2d2        | r2d2                                               | 1.75 | 0.00 |
| FBgn0032840 | sNPF        | short neuropeptide F precursor                     | 1.75 | 0.00 |
| FBgn0052956 | Chrac-14    | Chrac-14                                           | 1.74 | 0.00 |

|             |          |                                        |      |      |
|-------------|----------|----------------------------------------|------|------|
| FBgn0025806 | Rap2l    | Ras-associated protein 2-like          | 1.74 | 0.00 |
| FBgn0017577 | Mcm5     | Minichromosome maintenance 5           | 1.74 | 0.00 |
| FBgn0039271 | CG11839  | CG11839                                | 1.74 | 0.00 |
| FBgn0033958 | CG12858  | CG12858                                | 1.74 | 0.00 |
| FBgn0027057 | CSN1b    | COP9 complex homolog subunit 1 b       | 1.74 | 0.00 |
| FBgn0016059 | Sema-1b  | Sema-1b                                | 1.74 | 0.00 |
| FBgn0028380 | fal      | falten                                 | 1.74 | 0.00 |
| FBgn0034685 | CG6393   | CG6393                                 | 1.74 | 0.00 |
| FBgn0030355 | CG2467   | CG2467                                 | 1.74 | 0.00 |
| FBgn0035906 | CG6673   | CG6673                                 | 1.74 | 0.00 |
| FBgn0039463 | CG18472  | CG18472                                | 1.74 | 0.00 |
| FBgn0032004 | CG8292   | CG8292                                 | 1.74 | 0.00 |
| FBgn0030296 | CG15196  | CG15196                                | 1.74 | 0.00 |
| FBgn0004087 | Dhfr     | Dihydrofolate reductase                | 1.74 | 0.00 |
| FBgn0032816 | CG10447  | CG10447                                | 1.74 | 0.00 |
| FBgn0010218 | Cpn      | Calphotin                              | 1.74 | 0.00 |
| FBgn0033207 | CG12826  | CG12826                                | 1.74 | 0.00 |
| FBgn0034564 | CG9344   | CG9344                                 | 1.73 | 0.00 |
| FBgn0032196 | CG5708   | CG5708                                 | 1.73 | 0.00 |
| FBgn0052138 | CG32138  | CG32138                                | 1.73 | 0.00 |
| FBgn0014033 | Sr-CI    | Scavenger receptor class C, type I     | 1.73 | 0.00 |
| FBgn0035585 | CG12027  | CG12027                                | 1.73 | 0.00 |
| FBgn0032900 | CG14401  | CG14401                                | 1.73 | 0.00 |
| FBgn0025726 | unc-13   | unc-13                                 | 1.73 | 0.00 |
| FBgn0039136 | CG5902   | CG5902                                 | 1.73 | 0.00 |
| FBgn0025879 | Timp     | Tissue inhibitor of metalloproteases   | 1.73 | 0.00 |
| FBgn0032873 | CG2614   | CG2614                                 | 1.73 | 0.00 |
| FBgn0052922 | CG14681  | CG14681                                | 1.73 | 0.00 |
| FBgn0026585 | Ent2     | Equilibrative nucleoside transporter 2 | 1.73 | 0.00 |
| FBgn0051258 | CG31258  | CG31258                                | 1.73 | 0.00 |
| FBgn0036821 | CG3961   | CG3961                                 | 1.73 | 0.00 |
| FBgn0052423 | CG32423  | CG32423                                | 1.73 | 0.00 |
| FBgn0015299 | Ssb-c31a | Single stranded-binding protein c31A   | 1.73 | 0.00 |
| FBgn0037638 | CG8379   | CG8379                                 | 1.73 | 0.00 |
| FBgn0016715 | Reg-2    | Rhythmically expressed gene 2          | 1.73 | 0.00 |
| FBgn0035764 | mus312   | mutagen-sensitive 312                  | 1.73 | 0.00 |



|             |              |                                        |      |      |
|-------------|--------------|----------------------------------------|------|------|
| FBgn0032343 | CG6201       | CG6201                                 | 1.73 | 0.00 |
| FBgn0003008 | or           | orange                                 | 1.73 | 0.00 |
| FBgn0031317 | CG5118       | CG5118                                 | 1.72 | 0.00 |
| FBgn0036537 | CG18081      | CG18081                                | 1.72 | 0.00 |
| FBgn0028743 | CG5036       | CG5036                                 | 1.72 | 0.00 |
| FBgn0039352 | CG5053       | CG5053                                 | 1.72 | 0.00 |
| FBgn0017551 | Rca1         | Regulator of cyclin A1                 | 1.72 | 0.00 |
| FBgn0031626 | CG15631      | CG15631                                | 1.72 | 0.00 |
| FBgn0002534 | Lcp3         | Larval cuticle protein 3               | 1.72 | 0.00 |
| FBgn0025574 | Pli          | Pellino                                | 1.72 | 0.00 |
| FBgn0031776 | CG13993      | CG13993                                | 1.72 | 0.00 |
| FBgn0030180 | CG12102      | CG12102                                | 1.72 | 0.00 |
| FBgn0031494 | CG17219      | CG17219                                | 1.72 | 0.00 |
| FBgn0002284 | Pros26       | Proteasome 26kD subunit                | 1.72 | 0.00 |
| FBgn0031542 | CG15414      | CG15414                                | 1.72 | 0.00 |
| FBgn0036323 | CG14118      | CG14118                                | 1.72 | 0.00 |
| FBgn0028435 | Su(Tpl)      | Su(Tpl)                                | 1.72 | 0.00 |
| FBgn0032101 | CG9586       | CG9586                                 | 1.72 | 0.00 |
| FBgn0039234 | nct          | nicastrin                              | 1.72 | 0.00 |
| FBgn0036811 | MED11        | Mediator complex subunit 11            | 1.72 | 0.00 |
| FBgn0022131 | aPKC         | atypical protein kinase C              | 1.72 | 0.00 |
| FBgn0036485 | FucTA        | FucTA                                  | 1.72 | 0.02 |
| FBgn0037601 | Cyp313b1     | Cyp313b1                               | 1.72 | 0.00 |
| FBgn0036988 | CG5262       | CG5262                                 | 1.72 | 0.00 |
| FBgn0011598 | grp          | grapes                                 | 1.72 | 0.00 |
| FBgn0028428 | lh           | I[[h]] channel                         | 1.72 | 0.00 |
| FBgn0050222 | CG30222      | CG30222                                | 1.72 | 0.00 |
| FBgn0070364 | Dpse\GA10306 | GA10306                                | 1.71 | 0.02 |
| FBgn0028738 | ETH          | Ecdysis triggering hormone             | 1.71 | 0.00 |
| FBgn0010315 | CycD         | Cyclin D                               | 1.71 | 0.00 |
| FBgn0027890 | dUTPase      | Deoxyuridine triphosphatase            | 1.71 | 0.00 |
| FBgn0039128 | CG13599      | CG13599                                | 1.71 | 0.00 |
| FBgn0032847 | Taf13        | TBP-associated factor 13               | 1.71 | 0.00 |
| FBgn0031006 | rictror      | rapamycin-insensitive companion of Tor | 1.71 | 0.00 |
| FBgn0031034 | CG14205      | CG14205                                | 1.71 | 0.00 |
| FBgn0032524 | CG9267       | CG9267                                 | 1.71 | 0.00 |

|             |         |                                        |      |      |
|-------------|---------|----------------------------------------|------|------|
| FBgn0030710 | CG8924  | CG8924                                 | 1.71 | 0.00 |
| FBgn0026313 | X11L    | X11L                                   | 1.71 | 0.00 |
| FBgn0030280 | CG11106 | CG11106                                | 1.71 | 0.00 |
| FBgn0051391 | CG31391 | CG31391                                | 1.71 | 0.00 |
| FBgn0032482 | Pect    | Phosphoethanolamine cytidyltransferase | 1.71 | 0.00 |
| FBgn0034443 | cer     | crammer                                | 1.71 | 0.05 |
| FBgn0030955 | CG6891  | CG6891                                 | 1.71 | 0.00 |
| FBgn0050086 | CG33460 | CG33460                                | 1.71 | 0.00 |
| FBgn0013725 | phyl    | phyllopod                              | 1.71 | 0.00 |
| FBgn0039511 | CG3330  | CG3330                                 | 1.71 | 0.00 |
| FBgn0026749 | Yippee  | Yippee                                 | 1.71 | 0.00 |
| FBgn0031126 | Cyp6v1  | Cyp6v1                                 | 1.70 | 0.00 |
| FBgn0013347 | TfIIA-S | Transcription-factor-IIA-S             | 1.70 | 0.00 |
| FBgn0033948 | CG12863 | CG12863                                | 1.70 | 0.00 |
| FBgn0034451 | CG11242 | CG11242                                | 1.70 | 0.00 |
| FBgn0028892 | CG4161  | CG4161                                 | 1.70 | 0.00 |
| FBgn0032140 | CG13117 | CG13117                                | 1.70 | 0.00 |
| FBgn0051651 | pgant5  | polypeptide GalNAc transferase 5       | 1.70 | 0.00 |
| FBgn0035488 | CG11593 | CG11593                                | 1.70 | 0.00 |
| FBgn0032876 | CG1962  | CG1962                                 | 1.70 | 0.00 |
| FBgn0026777 | Rad23   | Rad23                                  | 1.70 | 0.00 |
| FBgn0035898 | CG6915  | CG6915                                 | 1.70 | 0.00 |
| FBgn0032632 | CG6380  | CG6380                                 | 1.70 | 0.00 |
| FBgn0004908 | Arf84F  | ADP ribosylation factor 84F            | 1.70 | 0.00 |
| FBgn0030625 | CG5877  | CG5877                                 | 1.70 | 0.00 |
| FBgn0040239 | bc10    | bc10                                   | 1.70 | 0.00 |
| FBgn0031229 | CG3436  | CG3436                                 | 1.70 | 0.00 |
| FBgn0024230 | Hs2st   | Hs2st                                  | 1.70 | 0.00 |
| FBgn0036437 | CG5048  | CG5048                                 | 1.70 | 0.00 |
| FBgn0028901 | CG18109 | CG18109                                | 1.70 | 0.00 |
| FBgn0036918 | CG7770  | CG7770                                 | 1.70 | 0.00 |
| FBgn0036820 | CG6852  | CG6852                                 | 1.70 | 0.00 |
| FBgn0001309 | kis     | kismet                                 | 1.70 | 0.00 |
| FBgn0037248 | CG9809  | CG9809                                 | 1.70 | 0.00 |
| FBgn0033899 | CG13016 | CG13016                                | 1.70 | 0.00 |
| FBgn0034759 | CG13511 | CG13511                                | 1.69 | 0.00 |

|             |          |                                  |      |      |
|-------------|----------|----------------------------------|------|------|
| FBgn0001254 | ImpE2    | Ecdysone-inducible gene E2       | 1.69 | 0.00 |
| FBgn0032014 | CG7840   | CG7840                           | 1.69 | 0.00 |
| FBgn0022936 | CycH     | Cyclin H                         | 1.69 | 0.00 |
| FBgn0037995 | CG3809   | CG3809                           | 1.69 | 0.00 |
| FBgn0015218 | eIF-4E   | Eukaryotic initiation factor 4E  | 1.69 | 0.00 |
| FBgn0051547 | CG31547  | CG31547                          | 1.69 | 0.00 |
| FBgn0002543 | lea      | leak                             | 1.69 | 0.00 |
| FBgn0051380 | CG31380  | CG31380                          | 1.69 | 0.00 |
| FBgn0031376 | CG10908  | CG10908                          | 1.69 | 0.00 |
| FBgn0029866 | CG3842   | CG3842                           | 1.69 | 0.00 |
| FBgn0035964 | Dhpr     | Dihydropteridine reductase       | 1.69 | 0.00 |
| FBgn0039031 | CG17244  | CG17244                          | 1.69 | 0.00 |
| FBgn0011230 | poe      | purity of essence                | 1.69 | 0.00 |
| FBgn0053208 | MICAL    | MICAL                            | 1.69 | 0.00 |
| FBgn0036956 | CG13813  | CG13813                          | 1.69 | 0.00 |
| FBgn0015778 | rin      | rasputin                         | 1.69 | 0.00 |
| FBgn0036299 | Tsf2     | Transferrin 2                    | 1.69 | 0.00 |
| FBgn0029728 | CG2861   | CG2861                           | 1.69 | 0.00 |
| FBgn0036356 | CG10222  | CG10222                          | 1.69 | 0.00 |
| FBgn0022341 | CG33521  | CG33521                          | 1.69 | 0.01 |
| FBgn0030597 | Eo       | Ecdysone oxidase                 | 1.68 | 0.00 |
| FBgn0000711 | flw      | flap wing                        | 1.68 | 0.00 |
| FBgn0029990 | CG2233   | CG2233                           | 1.68 | 0.00 |
| FBgn0026563 | CG1979   | CG1979                           | 1.68 | 0.00 |
| FBgn0025549 | unc-119  | unc-119                          | 1.68 | 0.00 |
| FBgn0041180 | TepIV    | Thiolester containing protein IV | 1.68 | 0.00 |
| FBgn0032946 | nrv3     | nervana 3                        | 1.68 | 0.00 |
| FBgn0000546 | EcR      | Ecdysone receptor                | 1.68 | 0.00 |
| FBgn0016983 | smid     | smallminded                      | 1.68 | 0.00 |
| FBgn0002968 | Nrg      | Neuroglian                       | 1.68 | 0.02 |
| FBgn0037956 | CG6959   | CG6959                           | 1.68 | 0.00 |
| FBgn0052075 | CG32075  | CG32075                          | 1.68 | 0.00 |
| FBgn0032693 | Cyp310a1 | Cyp310a1                         | 1.68 | 0.00 |
| FBgn0052666 | CG32666  | CG32666                          | 1.68 | 0.00 |
| FBgn0020633 | Mcm7     | Minichromosome maintenance 7     | 1.68 | 0.00 |
| FBgn0051275 | CG31275  | CG31275                          | 1.68 | 0.00 |

|             |           |                                               |      |      |
|-------------|-----------|-----------------------------------------------|------|------|
| FBgn0036489 | CG7011    | CG7011                                        | 1.68 | 0.00 |
| FBgn0039927 | CG11155   | CG11155                                       | 1.68 | 0.00 |
| FBgn0020369 | Pros45    | Pros45                                        | 1.68 | 0.00 |
| FBgn0031855 | CG11221   | CG11221                                       | 1.68 | 0.00 |
| FBgn0052041 | Hsp22     | Heat shock protein 22                         | 1.68 | 0.00 |
| FBgn0030818 | Arpc3B    | Arpc3B                                        | 1.68 | 0.00 |
| FBgn0028523 | CG5888    | CG5888                                        | 1.68 | 0.00 |
| FBgn0026379 | Pten      | Pten                                          | 1.68 | 0.00 |
| FBgn0025807 | Rad9      | Rad9                                          | 1.68 | 0.00 |
| FBgn0036884 | CG14098   | CG14098                                       | 1.68 | 0.00 |
| FBgn0016126 | CaMKI     | Calcium/calmodulin-dependent protein kinase I | 1.68 | 0.01 |
| FBgn0037332 | CG14670   | CG14670                                       | 1.68 | 0.00 |
| FBgn0036906 | CG14102   | CG14102                                       | 1.68 | 0.00 |
| FBgn0029512 | Aos1      | Aos1                                          | 1.68 | 0.00 |
| FBgn0031977 | CG7380    | CG7380                                        | 1.67 | 0.00 |
| FBgn0035902 | CG6683    | CG6683                                        | 1.67 | 0.00 |
| FBgn0032117 | FucTB     | FucTB                                         | 1.67 | 0.00 |
| FBgn0035020 | CG13585   | CG13585                                       | 1.67 | 0.00 |
| FBgn0033005 | CG3107    | CG3107                                        | 1.67 | 0.00 |
| FBgn0034199 | CG15917   | CG15917                                       | 1.67 | 0.00 |
| FBgn0051918 | CG31918   | CG31918                                       | 1.67 | 0.00 |
| FBgn0025458 | Bub1      | Bub1                                          | 1.67 | 0.01 |
| FBgn0035790 | Cyp316a1  | Cyp316a1                                      | 1.67 | 0.00 |
| FBgn0051998 | CG31998   | CG31998                                       | 1.67 | 0.00 |
| FBgn0036016 | CG3306    | CG3306                                        | 1.67 | 0.00 |
| FBgn0027783 | SMC2      | SMC2                                          | 1.67 | 0.00 |
| FBgn0010607 | l(2)05714 | lethal (2) 05714                              | 1.67 | 0.00 |
| FBgn0035623 | mthl2     | methuselah-like 2                             | 1.67 | 0.00 |
| FBgn0020907 | Scp2      | Sarcoplasmic calcium-binding protein 2        | 1.67 | 0.00 |
| FBgn0030114 | CG17754   | CG17754                                       | 1.67 | 0.00 |
| FBgn0035213 | CG2199    | CG2199                                        | 1.67 | 0.00 |
| FBgn0050268 | CG30268   | CG30268                                       | 1.67 | 0.00 |
| FBgn0040078 | pont      | pontin                                        | 1.67 | 0.00 |
| FBgn0038312 | CG4334    | CG4334                                        | 1.67 | 0.00 |
| FBgn0035199 | CG9134    | CG9134                                        | 1.67 | 0.00 |
| FBgn0033544 | CG7220    | CG7220                                        | 1.67 | 0.00 |

|             |          |                                                  |      |      |
|-------------|----------|--------------------------------------------------|------|------|
| FBgn0030941 | wgn      | wengen                                           | 1.67 | 0.00 |
| FBgn0029730 | CG12681  | CG12681                                          | 1.66 | 0.00 |
| FBgn0003391 | shg      | shotgun                                          | 1.66 | 0.00 |
| FBgn0033962 | CG10153  | CG10153                                          | 1.66 | 0.00 |
| FBgn0038985 | CG6921   | CG6921                                           | 1.66 | 0.00 |
| FBgn0036291 | CG10681  | CG10681                                          | 1.66 | 0.00 |
| FBgn0036262 | CG6910   | CG6910                                           | 1.66 | 0.00 |
| FBgn0013305 | Nmda1    | N-methyl-D-aspartate receptor-associated protein | 1.66 | 0.00 |
| FBgn0036522 | CG7372   | CG7372                                           | 1.66 | 0.00 |
| FBgn0036207 | CG10907  | CG10907                                          | 1.66 | 0.00 |
| FBgn0032683 | CG10275  | CG10275                                          | 1.66 | 0.00 |
| FBgn0027339 | jim      | jim                                              | 1.66 | 0.00 |
| FBgn0039413 | CG14556  | CG14556                                          | 1.66 | 0.00 |
| FBgn0022984 | qkr58E-3 | quaking related 58E-3                            | 1.66 | 0.00 |
| FBgn0036723 | CG12229  | CG12229                                          | 1.66 | 0.00 |
| FBgn0016076 | vri      | vri1                                             | 1.66 | 0.00 |
| FBgn0037087 | CG7519   | CG7519                                           | 1.66 | 0.00 |
| FBgn0037809 | CG12818  | CG12818                                          | 1.65 | 0.00 |
| FBgn0030704 | CG15916  | CG15916                                          | 1.65 | 0.00 |
| FBgn0035851 | MED24    | Mediator complex subunit 24                      | 1.65 | 0.00 |
| FBgn0037933 | Ho       | Heme oxygenase                                   | 1.65 | 0.00 |
| FBgn0038102 | CG14383  | CG14383                                          | 1.65 | 0.00 |
| FBgn0035975 | PGRP-LA  | Peptidoglycan recognition protein LA             | 1.65 | 0.00 |
| FBgn0011296 | l(2)efl  | lethal (2) essential for life                    | 1.65 | 0.00 |
| FBgn0029945 | CG18155  | CG18155                                          | 1.65 | 0.00 |
| FBgn0000216 | Brd      | Bearded                                          | 1.65 | 0.00 |
| FBgn0014010 | Rab5     | Rab-protein 5                                    | 1.65 | 0.00 |
| FBgn0032745 | CG10473  | CG10473                                          | 1.65 | 0.00 |
| FBgn0037556 | CG9636   | CG9636                                           | 1.65 | 0.01 |
| FBgn0031358 | CG17657  | CG17657                                          | 1.65 | 0.00 |
| FBgn0036520 | CG13449  | CG13449                                          | 1.65 | 0.00 |
| FBgn0034769 | Obp58c   | Odorant-binding protein 58c                      | 1.65 | 0.00 |
| FBgn0034833 | CG13539  | CG13539                                          | 1.65 | 0.00 |
| FBgn0003444 | smo      | smoothed                                         | 1.65 | 0.00 |
| FBgn0035538 | DopEcR   | DopEcR                                           | 1.65 | 0.00 |
| FBgn0037799 | CG12816  | CG12816                                          | 1.65 | 0.00 |

|             |              |                                 |      |      |
|-------------|--------------|---------------------------------|------|------|
| FBgn0034795 | MED23        | Mediator complex subunit 23     | 1.65 | 0.00 |
| FBgn0030756 | CG9903       | CG9903                          | 1.65 | 0.00 |
| FBgn0034737 | CG11362      | CG11362                         | 1.65 | 0.00 |
| FBgn0037434 | CG1249       | CG1249                          | 1.65 | 0.00 |
| FBgn0035640 | mad2         | mad2                            | 1.65 | 0.00 |
| FBgn0037696 | CG9362       | CG9362                          | 1.65 | 0.00 |
| FBgn0000536 | eas          | easily shocked                  | 1.65 | 0.00 |
| FBgn0033105 | l(2)k03203   | lethal (2) k03203               | 1.65 | 0.00 |
| FBgn0014032 | Sptr         | Sepiapterin reductase           | 1.65 | 0.00 |
| FBgn0005617 | msl-1        | male-specific lethal 1          | 1.65 | 0.00 |
| FBgn0035989 | CG3967       | CG3967                          | 1.65 | 0.00 |
| FBgn0029996 | Ubc-E2H      | Ubc-E2H                         | 1.64 | 0.01 |
| FBgn0039132 | AP-1sigma    | AP-1sigma                       | 1.64 | 0.00 |
| FBgn0036153 | CG7573       | CG7573                          | 1.64 | 0.00 |
| FBgn0002733 | HLHmbeta     | E(spl) region transcript mbeta  | 1.64 | 0.00 |
| FBgn0035969 | CG4476       | CG4476                          | 1.64 | 0.00 |
| FBgn0030813 | CG4949       | CG4949                          | 1.64 | 0.00 |
| FBgn0025676 | CkIIalpha-i3 | CKII-alpha subunit interactor-3 | 1.64 | 0.00 |
| FBgn0011747 | Ank          | Ankyrin                         | 1.64 | 0.00 |
| FBgn0031205 | CG12474      | CG12474                         | 1.64 | 0.00 |
| FBgn0037171 | CG14459      | CG14459                         | 1.64 | 0.00 |
| FBgn0035581 | CG17150      | CG17150                         | 1.64 | 0.00 |
| FBgn0032036 | CG13384      | CG13384                         | 1.64 | 0.00 |
| FBgn0032250 | CG5198       | CG5198                          | 1.64 | 0.00 |
| FBgn0010039 | GstD3        | Glutathione S transferase D3    | 1.64 | 0.00 |
| FBgn0035693 | CG8219       | CG8219                          | 1.64 | 0.00 |
| FBgn0036661 | CG9705       | CG9705                          | 1.64 | 0.00 |
| FBgn0040684 | CG12589      | CG12589                         | 1.63 | 0.00 |
| FBgn0052369 | CG32369      | CG32369                         | 1.63 | 0.00 |
| FBgn0051607 | CG31607      | CG31607                         | 1.63 | 0.00 |
| FBgn0036972 | CG6434       | CG6434                          | 1.63 | 0.00 |
| FBgn0035159 | CG13896      | CG13896                         | 1.63 | 0.00 |
| FBgn0036146 | CG14141      | CG14141                         | 1.63 | 0.00 |
| FBgn0004108 | Nrt          | Neurotactin                     | 1.63 | 0.00 |
| FBgn0032538 | CG16885      | CG16885                         | 1.63 | 0.00 |
| FBgn0031695 | Cyp4ac3      | Cyp4ac3                         | 1.63 | 0.00 |

|             |          |                                |      |      |
|-------------|----------|--------------------------------|------|------|
| FBgn0023081 | gek      | genghis khan                   | 1.63 | 0.00 |
| FBgn0038296 | CG6752   | CG6752                         | 1.63 | 0.00 |
| FBgn0035702 | CG10147  | CG10147                        | 1.63 | 0.00 |
| FBgn0031504 | CG15403  | CG15403                        | 1.63 | 0.00 |
| FBgn0035891 | Oseg1    | Oseg1                          | 1.63 | 0.00 |
| FBgn0030590 | CG9518   | CG9518                         | 1.63 | 0.00 |
| FBgn0030627 | gce      | germ cell-expressed bHLH-PAS   | 1.63 | 0.00 |
| FBgn0035296 | CG11814  | CG11814                        | 1.63 | 0.00 |
| FBgn0031996 | CG8460   | CG8460                         | 1.63 | 0.00 |
| FBgn0031458 | aph-1    | anterior pharynx defective 1   | 1.63 | 0.00 |
| FBgn0039403 | CG14549  | CG14549                        | 1.63 | 0.00 |
| FBgn0015037 | Cyp4p1   | Cytochrome P450-4p1            | 1.63 | 0.00 |
| FBgn0058283 | CG17528  | CG17528                        | 1.63 | 0.00 |
| FBgn0001112 | Gld      | Glucose dehydrogenase          | 1.63 | 0.00 |
| FBgn0030673 | CG15601  | CG15601                        | 1.63 | 0.00 |
| FBgn0030178 | CG2974   | CG2974                         | 1.63 | 0.00 |
| FBgn0058010 | cta      | concertina                     | 1.63 | 0.00 |
| FBgn0005666 | bt       | bent                           | 1.63 | 0.00 |
| FBgn0019972 | Ice      | Ice                            | 1.63 | 0.00 |
| FBgn0030179 | CG12094  | CG12094                        | 1.63 | 0.00 |
| FBgn0014163 | fax      | failed axon connections        | 1.63 | 0.02 |
| FBgn0003447 | sn       | singed                         | 1.63 | 0.00 |
| FBgn0038465 | CG8913   | CG8913                         | 1.63 | 0.00 |
| FBgn0039006 | Cyp6d4   | Cyp6d4                         | 1.63 | 0.00 |
| FBgn0025700 | CG5885   | CG5885                         | 1.63 | 0.00 |
| FBgn0030719 | eIF5     | eIF5                           | 1.62 | 0.00 |
| FBgn0031388 | CG12674  | CG12674                        | 1.62 | 0.00 |
| FBgn0029898 | CG14439  | CG14439                        | 1.62 | 0.00 |
| FBgn0036504 | yellow-k | yellow-k                       | 1.62 | 0.00 |
| FBgn0035482 | CG14985  | CG14985                        | 1.62 | 0.00 |
| FBgn0036476 | CG6945   | CG6945                         | 1.62 | 0.00 |
| FBgn0025615 | torp4a   | torp4a                         | 1.62 | 0.00 |
| FBgn0035507 | CG1308   | CG1308                         | 1.62 | 0.00 |
| FBgn0015829 | TfIIbeta | Transcription factor IIbeta    | 1.62 | 0.00 |
| FBgn0011274 | Dif      | Dorsal-related immunity factor | 1.62 | 0.00 |
| FBgn0027542 | CG6014   | CG6014                         | 1.62 | 0.00 |

|             |          |                           |      |      |
|-------------|----------|---------------------------|------|------|
| FBgn0030525 | CG10996  | CG10996                   | 1.62 | 0.00 |
| FBgn0034512 | CG18067  | CG18067                   | 1.62 | 0.00 |
| FBgn0002778 | mnd      | minidisks                 | 1.62 | 0.00 |
| FBgn0039144 | Atg6     | Autophagy-specific gene 6 | 1.62 | 0.00 |
| FBgn0032420 | CG6583   | CG6583                    | 1.62 | 0.00 |
| FBgn0031283 | CG15880  | CG15880                   | 1.62 | 0.00 |
| FBgn0037279 | CG1129   | CG1129                    | 1.62 | 0.00 |
| FBgn0026063 | KP78b    | KP78b                     | 1.62 | 0.00 |
| FBgn0037368 | CG1239   | CG1239                    | 1.62 | 0.00 |
| FBgn0029094 | asf1     | anti-silencing factor 1   | 1.62 | 0.00 |
| FBgn0038932 | CG5740   | CG5740                    | 1.62 | 0.00 |
| FBgn0033265 | CG8710   | CG8710                    | 1.62 | 0.00 |
| FBgn0031037 | CG14207  | CG14207                   | 1.62 | 0.00 |
| FBgn0030749 | Anxb11   | Annexin B11               | 1.62 | 0.00 |
| FBgn0037722 | CG8319   | CG8319                    | 1.62 | 0.01 |
| FBgn0031762 | CG9098   | CG9098                    | 1.62 | 0.00 |
| FBgn0052944 | CG32944  | CG32944                   | 1.62 | 0.00 |
| FBgn0026148 | CG12253  | CG12253                   | 1.62 | 0.00 |
| FBgn0035194 | CG9187   | CG9187                    | 1.62 | 0.00 |
| FBgn0030276 | Dlic2    | Dlic2                     | 1.62 | 0.00 |
| FBgn0032030 | CG17293  | CG17293                   | 1.61 | 0.00 |
| FBgn0031513 | CG3347   | CG3347                    | 1.61 | 0.00 |
| FBgn0004395 | unk      | unkempt                   | 1.61 | 0.00 |
| FBgn0022701 | Cht3     | Chitinase 3               | 1.61 | 0.00 |
| FBgn0035407 | CG14962  | CG14962                   | 1.61 | 0.00 |
| FBgn0037647 | CG11968  | CG11968                   | 1.61 | 0.00 |
| FBgn0038210 | CG3199   | CG3199                    | 1.61 | 0.00 |
| FBgn0030462 | CG15742  | CG15742                   | 1.61 | 0.00 |
| FBgn0058289 | CG17883  | CG17883                   | 1.61 | 0.00 |
| FBgn0025637 | skpA     | skpA                      | 1.61 | 0.00 |
| FBgn0033775 | Cyp9h1   | Cyp9h1                    | 1.61 | 0.00 |
| FBgn0031136 | l(1)19Ec | lethal (1) 19Ec           | 1.61 | 0.00 |
| FBgn0039328 | CG10675  | CG10675                   | 1.61 | 0.00 |
| FBgn0038419 | CG14879  | CG14879                   | 1.61 | 0.00 |
| FBgn0035514 | CG1332   | CG1332                    | 1.61 | 0.00 |
| FBgn0037234 | CG9795   | CG9795                    | 1.61 | 0.00 |



|             |         |                                           |      |      |
|-------------|---------|-------------------------------------------|------|------|
| FBgn0001227 | Hsp67Ba | Heat shock gene 67Ba                      | 1.61 | 0.00 |
| FBgn0001090 | bnb     | bangles and beads                         | 1.61 | 0.00 |
| FBgn0039914 | mav     | maverick                                  | 1.61 | 0.05 |
| FBgn0033675 | CG8889  | CG8889                                    | 1.61 | 0.00 |
| FBgn0035763 | CG8602  | CG8602                                    | 1.61 | 0.00 |
| FBgn0028857 | CG12448 | CG12448                                   | 1.61 | 0.00 |
| FBgn0031270 | CG13689 | CG13689                                   | 1.61 | 0.00 |
| FBgn0031969 | CG7228  | CG7228                                    | 1.61 | 0.00 |
| FBgn0031921 | CG6630  | CG6630                                    | 1.61 | 0.00 |
| FBgn0032728 | CG18398 | CG18398                                   | 1.61 | 0.00 |
| FBgn0011653 | mas     | masquerade                                | 1.61 | 0.00 |
| FBgn0032522 | CG16848 | CG16848                                   | 1.61 | 0.00 |
| FBgn0034228 | CG14479 | CG14479                                   | 1.61 | 0.00 |
| FBgn0031279 | CG3544  | CG3544                                    | 1.61 | 0.00 |
| FBgn0039874 | CG2135  | CG2135                                    | 1.61 | 0.00 |
| FBgn0035160 | CG13897 | CG13897                                   | 1.61 | 0.00 |
| FBgn0039735 | CG7911  | CG7911                                    | 1.61 | 0.00 |
| FBgn0016797 | fz2     | frizzled 2                                | 1.61 | 0.00 |
| FBgn0033788 | CG13323 | CG13323                                   | 1.61 | 0.00 |
| FBgn0035161 | CG13898 | CG13898                                   | 1.61 | 0.00 |
| FBgn0032074 | Tsp29Fa | Tetraspanin 29Fa                          | 1.61 | 0.00 |
| FBgn0039088 | CG10164 | CG10164                                   | 1.61 | 0.00 |
| FBgn0039165 | CG6204  | CG6204                                    | 1.60 | 0.00 |
| FBgn0032634 | Rpb11   | Rpb11                                     | 1.60 | 0.00 |
| FBgn0039002 | CG17625 | CG17625                                   | 1.60 | 0.00 |
| FBgn0010314 | Cks30A  | Cyclin-dependent kinase subunit 30A       | 1.60 | 0.00 |
| FBgn0051169 | CG31169 | CG31169                                   | 1.60 | 0.00 |
| FBgn0038432 | CG14883 | CG14883                                   | 1.60 | 0.00 |
| FBgn0040871 | CG12479 | CG12479                                   | 1.60 | 0.00 |
| FBgn0051285 | CG31285 | CG31285                                   | 1.60 | 0.00 |
| FBgn0052176 | CG32176 | CG32176                                   | 1.60 | 0.00 |
| FBgn0030393 | CG15926 | CG15926                                   | 1.60 | 0.00 |
| FBgn0031816 | CG16947 | CG16947                                   | 1.60 | 0.00 |
| FBgn0035574 | Gef64C  | Guanine nucleotide exchange factor GEF64C | 1.60 | 0.00 |
| FBgn0035090 | CG2736  | CG2736                                    | 1.60 | 0.00 |
| FBgn0036317 | CG10948 | CG10948                                   | 1.60 | 0.00 |

|             |              |                               |      |      |
|-------------|--------------|-------------------------------|------|------|
| FBgn0040493 | granny-smith | granny smith                  | 1.60 | 0.00 |
| FBgn0017581 | Lk6          | Lk6                           | 1.60 | 0.00 |
| FBgn0035111 | CG16940      | CG16940                       | 1.60 | 0.00 |
| FBgn0032047 | CG13088      | CG13088                       | 1.60 | 0.00 |
| FBgn0004429 | LysP         | Lysozyme P                    | 1.60 | 0.00 |
| FBgn0011241 | cbx          | crossbronx                    | 1.60 | 0.00 |
| FBgn0028527 | CG18507      | CG18507                       | 1.60 | 0.00 |
| FBgn0014020 | Rho1         | Rho1                          | 1.60 | 0.00 |
| FBgn0039405 | CG14550      | CG14550                       | 1.60 | 0.00 |
| FBgn0010660 | Nup214       | Nup214                        | 1.60 | 0.00 |
| FBgn0030864 | CG8173       | CG8173                        | 1.60 | 0.00 |
| FBgn0036426 | CG9592       | CG9592                        | 1.60 | 0.00 |
| FBgn0031049 | CG14214      | CG14214                       | 1.60 | 0.00 |
| FBgn0028486 | CG2967       | CG2967                        | 1.60 | 0.00 |
| FBgn0004797 | mdy          | midway                        | 1.60 | 0.00 |
| FBgn0036332 | CG11261      | CG11261                       | 1.60 | 0.00 |
| FBgn0038965 | mats         | mob as tumor suppressor       | 1.60 | 0.00 |
| FBgn0051368 | CG31368      | CG31368                       | 1.60 | 0.00 |
| FBgn0031610 | CG15436      | CG15436                       | 1.60 | 0.00 |
| FBgn0017418 | ari-1        | ariadne                       | 1.60 | 0.00 |
| FBgn0031973 | CG7219       | CG7219                        | 1.60 | 0.00 |
| FBgn0039228 | CG6980       | CG6980                        | 1.60 | 0.00 |
| FBgn0033993 | CG8089       | CG8089                        | 1.60 | 0.00 |
| FBgn0013301 | Mst35Bb      | Male-specific-transcript-35Bb | 1.60 | 0.00 |
| FBgn0016070 | smg          | smaug                         | 1.60 | 0.00 |
| FBgn0028855 | CG15282      | CG15282                       | 1.60 | 0.00 |
| FBgn0011802 | Dhh1         | DEAD/DEAH RNA helicase 1      | 1.59 | 0.00 |
| FBgn0030725 | CG8958       | CG8958                        | 1.59 | 0.00 |
| FBgn0045495 | Gr28b        | Gustatory receptor 28b        | 1.59 | 0.00 |
| FBgn0020622 | Pi3K21B      | Pi3K21B                       | 1.59 | 0.00 |
| FBgn0035627 | Sse          | Separase                      | 1.59 | 0.00 |
| FBgn0051716 | CG31716      | CG31716                       | 1.59 | 0.00 |
| FBgn0032658 | CG5681       | CG5681                        | 1.59 | 0.00 |
| FBgn0035986 | CG4022       | CG4022                        | 1.59 | 0.00 |
| FBgn0058291 | CG17486      | CG17486                       | 1.59 | 0.00 |
| FBgn0039129 | RpS19b       | Ribosomal protein S19b        | 1.59 | 0.00 |

|             |           |                              |      |      |
|-------------|-----------|------------------------------|------|------|
| FBgn0030485 | CG1998    | CG1998                       | 1.59 | 0.00 |
| FBgn0035970 | CG4483    | CG4483                       | 1.59 | 0.00 |
| FBgn0014857 | His3.3A   | Histone H3.3A                | 1.59 | 0.00 |
| FBgn0035772 | Sh3beta   | Sh3beta                      | 1.59 | 0.00 |
| FBgn0052542 | CG32542   | CG32542                      | 1.59 | 0.00 |
| FBgn0052499 | CG32499   | CG32499                      | 1.59 | 0.00 |
| FBgn0034739 | CG3927    | CG3927                       | 1.59 | 0.00 |
| FBgn0032700 | CG10338   | CG10338                      | 1.59 | 0.00 |
| FBgn0037963 | Cad87A    | Cad87A                       | 1.59 | 0.00 |
| FBgn0030342 | CG10347   | CG10347                      | 1.59 | 0.00 |
| FBgn0033029 | l(2)NC136 | lethal (2) NC136             | 1.59 | 0.01 |
| FBgn0030456 | CG4332    | CG4332                       | 1.59 | 0.00 |
| FBgn0035415 | CG14966   | CG14966                      | 1.59 | 0.00 |
| FBgn0033261 | CG18316   | CG18316                      | 1.59 | 0.00 |
| FBgn0001149 | GstD1     | Glutathione S transferase D1 | 1.59 | 0.02 |
| FBgn0037252 | CG14650   | CG14650                      | 1.59 | 0.00 |
| FBgn0039907 | lgs       | legless                      | 1.59 | 0.00 |
| FBgn0038090 | CG10909   | CG10909                      | 1.59 | 0.00 |
| FBgn0035444 | CG12012   | CG12012                      | 1.59 | 0.01 |
| FBgn0031315 | CG14341   | CG14341                      | 1.59 | 0.00 |
| FBgn0005278 | M(2)21AB  | Minute (2) 21AB              | 1.59 | 0.00 |
| FBgn0033453 | CG1667    | CG1667                       | 1.58 | 0.00 |
| FBgn0033285 | CG18449   | CG18449                      | 1.58 | 0.02 |
| FBgn0039356 | CG5039    | CG5039                       | 1.58 | 0.00 |
| FBgn0038979 | CG7046    | CG7046                       | 1.58 | 0.00 |
| FBgn0010633 | vlc       | vulcan                       | 1.58 | 0.00 |
| FBgn0011586 | e(r)      | enhancer of rudimentary      | 1.58 | 0.01 |
| FBgn0037737 | Pnn       | Pinin                        | 1.58 | 0.00 |
| FBgn0030591 | CG9517    | CG9517                       | 1.58 | 0.02 |
| FBgn0036218 | CG14128   | CG14128                      | 1.58 | 0.00 |
| FBgn0035094 | CG9380    | CG9380                       | 1.58 | 0.00 |
| FBgn0033996 | CG11807   | CG11807                      | 1.58 | 0.00 |
| FBgn0037514 | CG10919   | CG10919                      | 1.58 | 0.00 |
| FBgn0031995 | CG8475    | CG8475                       | 1.58 | 0.00 |
| FBgn0043455 | CG5986    | CG5986                       | 1.58 | 0.00 |
| FBgn0015380 | drl       | derailed                     | 1.58 | 0.00 |

|             |           |                                      |      |      |
|-------------|-----------|--------------------------------------|------|------|
| FBgn0033551 | CG7222    | CG7222                               | 1.58 | 0.01 |
| FBgn0038082 | CG5724    | CG5724                               | 1.58 | 0.00 |
| FBgn0039505 | CG5934    | CG5934                               | 1.58 | 0.00 |
| FBgn0030320 | CG2247    | CG2247                               | 1.58 | 0.00 |
| FBgn0001085 | fz        | frizzled                             | 1.58 | 0.00 |
| FBgn0030170 | CG2990    | CG2990                               | 1.58 | 0.00 |
| FBgn0004381 | Klp68D    | Kinesin-like protein at 68D          | 1.58 | 0.00 |
| FBgn0011305 | Rsf1      | Repressor splicing factor 1          | 1.58 | 0.00 |
| FBgn0045064 | bwa       | brain washing                        | 1.58 | 0.00 |
| FBgn0039902 | CG2177    | CG2177                               | 1.58 | 0.00 |
| FBgn0035631 | Txl       | Thioredoxin-like                     | 1.58 | 0.00 |
| FBgn0036223 | CG14126   | CG14126                              | 1.58 | 0.00 |
| FBgn0014184 | Oda       | Ornithine decarboxylase antizyme     | 1.58 | 0.00 |
| FBgn0033287 | CG8701    | CG8701                               | 1.58 | 0.02 |
| FBgn0022361 | Pur-alpha | Purine-rich binding protein-alpha    | 1.57 | 0.00 |
| FBgn0004556 | Dbp73D    | Dead box protein 73D                 | 1.57 | 0.00 |
| FBgn0027617 | CG5808    | CG5808                               | 1.57 | 0.00 |
| FBgn0052089 | Vha16-2   | Vha16-2                              | 1.57 | 0.00 |
| FBgn0005386 | ash1      | absent, small, or homeotic discs 1   | 1.57 | 0.00 |
| FBgn0039574 | CG16918   | CG16918                              | 1.57 | 0.00 |
| FBgn0028519 | CG4500    | CG4500                               | 1.57 | 0.00 |
| FBgn0003087 | pim       | pimples                              | 1.57 | 0.00 |
| FBgn0025394 | CG32810   | CG32810                              | 1.57 | 0.00 |
| FBgn0033613 | CG13211   | CG13211                              | 1.57 | 0.00 |
| FBgn0036708 | CG13725   | CG13725                              | 1.57 | 0.00 |
| FBgn0033755 | CG8594    | CG8594                               | 1.57 | 0.00 |
| FBgn0037223 | CG14638   | CG14638                              | 1.57 | 0.00 |
| FBgn0032588 | CG5968    | CG5968                               | 1.57 | 0.00 |
| FBgn0029952 | CG12689   | CG12689                              | 1.57 | 0.00 |
| FBgn0030700 | CG15914   | CG15914                              | 1.57 | 0.00 |
| FBgn0033970 | CG10205   | CG10205                              | 1.57 | 0.00 |
| FBgn0015586 | Acp76A    | Accessory gland-specific peptide 76A | 1.57 | 0.00 |
| FBgn0036331 | CG14117   | CG14117                              | 1.57 | 0.00 |
| FBgn0032231 | CG5056    | CG5056                               | 1.57 | 0.00 |
| FBgn0010387 | Dbi       | Diazepam-binding inhibitor           | 1.57 | 0.00 |
| FBgn0037668 | CG16736   | CG16736                              | 1.57 | 0.00 |

|             |           |                                     |      |      |
|-------------|-----------|-------------------------------------|------|------|
| FBgn0036812 | Nufip     | Nufip                               | 1.57 | 0.00 |
| FBgn0053100 | 4EHP      | 4EHP                                | 1.57 | 0.00 |
| FBgn0033112 | CG9454    | CG9454                              | 1.57 | 0.00 |
| FBgn0030757 | CG9902    | CG9902                              | 1.57 | 0.00 |
| FBgn0052048 | CG32048   | CG32048                             | 1.57 | 0.00 |
| FBgn0036141 | MRP       | Multidrug-Resistance like Protein 1 | 1.57 | 0.00 |
| FBgn0037417 | Osi10     | Osiris 10                           | 1.57 | 0.00 |
| FBgn0035703 | CG8270    | CG8270                              | 1.57 | 0.00 |
| FBgn0037967 | CG3281    | CG3281                              | 1.57 | 0.00 |
| FBgn0037578 | CG9601    | CG9601                              | 1.56 | 0.00 |
| FBgn0030942 | l(1)G0003 | lethal (1) G0003                    | 1.56 | 0.00 |
| FBgn0036793 | CG4174    | CG4174                              | 1.56 | 0.00 |
| FBgn0036263 | thoc6     | thoc6                               | 1.56 | 0.00 |
| FBgn0052253 | CG11583   | CG11583                             | 1.56 | 0.00 |
| FBgn0036118 | CG14145   | CG14145                             | 1.56 | 0.00 |
| FBgn0035892 | exo70     | exo70                               | 1.56 | 0.00 |
| FBgn0034774 | CG13526   | CG13526                             | 1.56 | 0.00 |
| FBgn0031213 | galectin  | galectin                            | 1.56 | 0.00 |
| FBgn0053188 | CG33936   | CG33936                             | 1.56 | 0.00 |
| FBgn0037553 | CG18249   | CG18249                             | 1.56 | 0.00 |
| FBgn0030624 | CG9106    | CG9106                              | 1.56 | 0.00 |
| FBgn0015287 | RfC40     | Replication-factor-C 40kD subunit   | 1.56 | 0.00 |
| FBgn0029752 | TrxT      | Thioredoxin T                       | 1.56 | 0.00 |
| FBgn0033639 | CG9003    | CG9003                              | 1.56 | 0.00 |
| FBgn0037433 | CG17919   | CG17919                             | 1.56 | 0.00 |
| FBgn0036406 | CG13484   | CG13484                             | 1.56 | 0.00 |
| FBgn0037228 | CG1092    | CG1092                              | 1.56 | 0.00 |
| FBgn0052179 | Krn       | Keren                               | 1.56 | 0.00 |
| FBgn0031463 | CG15400   | CG15400                             | 1.56 | 0.00 |
| FBgn0051217 | CG31217   | CG31217                             | 1.56 | 0.00 |
| FBgn0010287 | Trf       | TBP-related factor                  | 1.56 | 0.00 |
| FBgn0040786 | CG14104   | CG14104                             | 1.56 | 0.00 |
| FBgn0052043 | CG32043   | CG32043                             | 1.56 | 0.00 |
| FBgn0031876 | CG9200    | CG9200                              | 1.56 | 0.00 |
| FBgn0033724 | CG8501    | CG8501                              | 1.56 | 0.00 |
| FBgn0026315 | Ugt35a    | UDP-glycosyltransferase 35a         | 1.56 | 0.00 |

|             |          |                                  |      |      |
|-------------|----------|----------------------------------|------|------|
| FBgn0000635 | Fas2     | Fasciclin 2                      | 1.56 | 0.01 |
| FBgn0036668 | CG9715   | CG9715                           | 1.56 | 0.00 |
| FBgn0014189 | Hel25E   | Helicase at 25E                  | 1.56 | 0.00 |
| FBgn0038451 | CG14893  | CG14893                          | 1.56 | 0.00 |
| FBgn0038819 | CG5494   | CG5494                           | 1.56 | 0.05 |
| FBgn0034651 | CG15676  | CG15676                          | 1.56 | 0.00 |
| FBgn0026141 | Cdlc2    | Cytoplasmic dynein light chain 2 | 1.56 | 0.00 |
| FBgn0028997 | nmdyn-D7 | nmdyn-D7                         | 1.56 | 0.00 |
| FBgn0016701 | Rab4     | Rab-protein 4                    | 1.56 | 0.00 |
| FBgn0030079 | CG7267   | CG7267                           | 1.56 | 0.00 |
| FBgn0035843 | mus301   | mutagen-sensitive 301            | 1.56 | 0.00 |
| FBgn0015754 | Lis-1    | Lissencephaly-1                  | 1.56 | 0.00 |
| FBgn0015331 | abs      | abstrakt                         | 1.56 | 0.00 |
| FBgn0028689 | Rpn6     | Proteasome p44.5 subunit         | 1.56 | 0.00 |
| FBgn0035907 | CG6662   | CG6662                           | 1.56 | 0.00 |
| FBgn0034847 | CG3502   | CG3502                           | 1.56 | 0.00 |
| FBgn0039869 | CG1890   | CG1890                           | 1.55 | 0.00 |
| FBgn0010198 | RpS15Aa  | Ribosomal protein S15Aa          | 1.55 | 0.00 |
| FBgn0033059 | CG7845   | CG7845                           | 1.55 | 0.00 |
| FBgn0033450 | CG12924  | CG12924                          | 1.55 | 0.00 |
| FBgn0003495 | spz      | spatzle                          | 1.55 | 0.00 |
| FBgn0010405 | Pros25   | Proteasome 25kD subunit          | 1.55 | 0.00 |
| FBgn0011591 | fng      | fringe                           | 1.55 | 0.00 |
| FBgn0058460 | CG17159  | CG17159                          | 1.55 | 0.00 |
| FBgn0011710 | 38961    | Septin-1                         | 1.55 | 0.01 |
| FBgn0040942 | CG12643  | CG12643                          | 1.55 | 0.00 |
| FBgn0030025 | CG2147   | CG2147                           | 1.55 | 0.00 |
| FBgn0058411 | Parp     | Poly-(ADP-ribose) polymerase     | 1.55 | 0.01 |
| FBgn0033017 | CG10465  | CG10465                          | 1.55 | 0.00 |
| FBgn0034760 | CG13512  | CG13512                          | 1.55 | 0.00 |
| FBgn0030801 | CG4875   | CG4875                           | 1.55 | 0.00 |
| FBgn0040687 | CG14645  | CG14645                          | 1.55 | 0.00 |
| FBgn0053091 | CG11889  | CG11889                          | 1.55 | 0.00 |
| FBgn0004174 | Mst84Dc  | Male-specific RNA 84Dc           | 1.55 | 0.01 |
| FBgn0026374 | Rhp      | Rhophilin                        | 1.55 | 0.00 |
| FBgn0000426 | DebB     | Developmental embryonic B        | 1.55 | 0.00 |

|             |           |                              |      |      |
|-------------|-----------|------------------------------|------|------|
| FBgn0032115 | CG4438    | CG4438                       | 1.55 | 0.00 |
| FBgn0032202 | CG18619   | CG18619                      | 1.55 | 0.00 |
| FBgn0036277 | CG10418   | CG10418                      | 1.55 | 0.00 |
| FBgn0036156 | CG11726   | CG11726                      | 1.55 | 0.00 |
| FBgn0037634 | CG8359    | CG8359                       | 1.55 | 0.00 |
| FBgn0010460 | bun       | bunched                      | 1.55 | 0.00 |
| FBgn0035761 | RhoGEF4   | RhoGEF4                      | 1.55 | 0.00 |
| FBgn0029984 | l(1)G0193 | lethal (1) G0193             | 1.55 | 0.00 |
| FBgn0030409 | CG15728   | CG15728                      | 1.55 | 0.00 |
| FBgn0015831 | Rtnl2     | Rtnl2                        | 1.55 | 0.00 |
| FBgn0031878 | sip2      | septin interacting protein 2 | 1.54 | 0.00 |
| FBgn0004173 | Mst84Db   | Male-specific RNA 84Db       | 1.54 | 0.01 |
| FBgn0030765 | CG9742    | CG9742                       | 1.54 | 0.00 |
| FBgn0027885 | Aac11     | Aac11                        | 1.54 | 0.00 |
| FBgn0001185 | her       | hermaphrodite                | 1.54 | 0.00 |
| FBgn0039122 | CG10192   | CG10192                      | 1.54 | 0.00 |
| FBgn0032497 | CG6043    | CG6043                       | 1.54 | 0.00 |
| FBgn0030936 | CG6481    | CG6481                       | 1.54 | 0.00 |
| FBgn0032665 | CG15152   | CG15152                      | 1.54 | 0.00 |
| FBgn0035782 | CG14835   | CG14835                      | 1.54 | 0.00 |
| FBgn0053038 | CG10731   | CG10731                      | 1.54 | 0.00 |
| FBgn0001981 | esg       | escargot                     | 1.54 | 0.00 |
| FBgn0035737 | CG8634    | CG8634                       | 1.54 | 0.00 |
| FBgn0003261 | Rm62      | Rm62                         | 1.54 | 0.00 |
| FBgn0052662 | CG32662   | CG32662                      | 1.54 | 0.00 |
| FBgn0028515 | CG4930    | CG4930                       | 1.54 | 0.00 |
| FBgn0026737 | CG6171    | CG6171                       | 1.54 | 0.00 |
| FBgn0034654 | CG10306   | CG10306                      | 1.54 | 0.00 |
| FBgn0035464 | CG12006   | CG12006                      | 1.54 | 0.00 |
| FBgn0034468 | Obp56a    | Odorant-binding protein 56a  | 1.54 | 0.00 |
| FBgn0001624 | dlg1      | discs large 1                | 1.54 | 0.00 |
| FBgn0036421 | CG13481   | CG13481                      | 1.54 | 0.00 |
| FBgn0003449 | snf       | sans fille                   | 1.54 | 0.00 |
| FBgn0004449 | Ten-m     | Tenascin major               | 1.54 | 0.00 |
| FBgn0033063 | CG14589   | CG14589                      | 1.54 | 0.00 |
| FBgn0020294 | ko        | knockout                     | 1.54 | 0.00 |

|             |          |                                      |      |      |
|-------------|----------|--------------------------------------|------|------|
| FBgn0039462 | CG14252  | CG14252                              | 1.54 | 0.00 |
| FBgn0039323 | CG10559  | CG10559                              | 1.54 | 0.00 |
| FBgn0036313 | Atg1     | Autophagy-specific gene 1            | 1.54 | 0.00 |
| FBgn0013343 | Syx1A    | Syntaxin 1A                          | 1.54 | 0.00 |
| FBgn0038071 | CG6234   | CG6234                               | 1.54 | 0.00 |
| FBgn0037076 | CG12972  | CG12972                              | 1.54 | 0.00 |
| FBgn0035917 | CG6416   | CG6416                               | 1.54 | 0.00 |
| FBgn0052912 | PGRP-LD  | Peptidoglycan recognition protein LD | 1.54 | 0.01 |
| FBgn0036478 | CG6854   | CG6854                               | 1.54 | 0.00 |
| FBgn0030457 | CG12096  | CG12096                              | 1.53 | 0.00 |
| FBgn0032218 | CG5381   | CG5381                               | 1.53 | 0.00 |
| FBgn0052086 | CG32086  | CG32086                              | 1.53 | 0.00 |
| FBgn0027496 | CG9543   | CG9543                               | 1.53 | 0.00 |
| FBgn0037017 | CG4074   | CG4074                               | 1.53 | 0.00 |
| FBgn0004919 | gol      | goliath                              | 1.53 | 0.01 |
| FBgn0034366 | Atg7     | Autophagy-specific gene 7            | 1.53 | 0.00 |
| FBgn0001977 | l(2)35Bg | lethal (2) 35Bg                      | 1.53 | 0.00 |
| FBgn0030539 | CG1368   | CG1368                               | 1.53 | 0.01 |
| FBgn0035709 | CG10124  | CG10124                              | 1.53 | 0.00 |
| FBgn0028387 | chm      | chameau                              | 1.53 | 0.00 |
| FBgn0035617 | CG5146   | CG5146                               | 1.53 | 0.00 |
| FBgn0034230 | CG4853   | CG4853                               | 1.53 | 0.00 |
| FBgn0032702 | CG10376  | CG10376                              | 1.53 | 0.00 |
| FBgn0020429 | GluRIIB  | Glutamate receptor IIB               | 1.53 | 0.00 |
| FBgn0038368 | CG14876  | CG14876                              | 1.53 | 0.00 |
| FBgn0000338 | cnc      | cap-n-collar                         | 1.53 | 0.00 |
| FBgn0027948 | msps     | mini spindles                        | 1.53 | 0.00 |
| FBgn0000273 | Pka-C1   | cAMP-dependent protein kinase 1      | 1.53 | 0.00 |
| FBgn0036441 | CG13476  | CG13476                              | 1.53 | 0.00 |
| FBgn0036090 | CG8009   | CG8009                               | 1.53 | 0.00 |
| FBgn0037396 | CG11459  | CG11459                              | 1.53 | 0.01 |
| FBgn0002022 | Catsup   | Catecholamines up                    | 1.53 | 0.00 |
| FBgn0027565 | CG5498   | CG5498                               | 1.53 | 0.00 |
| FBgn0024252 | Ark      | Apaf-1-related-killer                | 1.53 | 0.00 |
| FBgn0036446 | CG9384   | CG9384                               | 1.53 | 0.00 |
| FBgn0039421 | CG6036   | CG6036                               | 1.53 | 0.00 |



|             |             |                                               |      |      |
|-------------|-------------|-----------------------------------------------|------|------|
| FBgn0004586 | grh         | grainy head                                   | 1.53 | 0.00 |
| FBgn0036125 | CG6279      | CG6279                                        | 1.53 | 0.00 |
| FBgn0029114 | Tollo       | Tollo                                         | 1.52 | 0.00 |
| FBgn0039415 | CG6142      | CG6142                                        | 1.52 | 0.00 |
| FBgn0037094 | CG7611      | CG7611                                        | 1.52 | 0.00 |
| FBgn0020414 | ldgf3       | Imaginal disc growth factor 3                 | 1.52 | 0.00 |
| FBgn0040285 | Scamp       | Scamp                                         | 1.52 | 0.00 |
| FBgn0001084 | fy          | fuzzy                                         | 1.52 | 0.00 |
| FBgn0030235 | Imp         | IGF-II mRNA-binding protein                   | 1.52 | 0.00 |
| FBgn0032929 | Mcm10       | Sensitized chromosome inheritance modifier 19 | 1.52 | 0.00 |
| FBgn0033187 | CG2144      | CG2144                                        | 1.52 | 0.00 |
| FBgn0035480 | CG14984     | CG14984                                       | 1.52 | 0.00 |
| FBgn0028433 | Ggamma30A   | G protein gamma30A                            | 1.52 | 0.00 |
| FBgn0030646 | CG9203      | CG9203                                        | 1.52 | 0.00 |
| FBgn0040932 | CG12650     | CG12650                                       | 1.52 | 0.00 |
| FBgn0030952 | CG12609     | CG12609                                       | 1.52 | 0.00 |
| FBgn0035211 | CG2211      | CG2211                                        | 1.52 | 0.00 |
| FBgn0004370 | Ptp10D      | Protein tyrosine phosphatase 10D              | 1.52 | 0.00 |
| FBgn0003716 | tkv         | thickveins                                    | 1.52 | 0.00 |
| FBgn0052475 | mthl8       | methuselah-like 8                             | 1.52 | 0.01 |
| FBgn0034785 | CG3649      | CG3649                                        | 1.52 | 0.00 |
| FBgn0040963 | CG18662     | CG18662                                       | 1.52 | 0.00 |
| FBgn0032943 | Tsp39D      | Tetraspanin 39D                               | 1.52 | 0.00 |
| FBgn0030803 | CG4880      | CG4880                                        | 1.52 | 0.00 |
| FBgn0034246 | Dcr-2       | Dicer-2                                       | 1.52 | 0.00 |
| FBgn0051802 | CG31802     | CG31802                                       | 1.52 | 0.00 |
| FBgn0050169 | CG30169     | CG30169                                       | 1.52 | 0.00 |
| FBgn0000412 | D1          | D1 chromosomal protein                        | 1.52 | 0.00 |
| FBgn0032553 | CG4480      | CG4480                                        | 1.52 | 0.00 |
| FBgn0036641 | Smn         | survival motor neuron                         | 1.52 | 0.00 |
| FBgn0038192 | CG9924      | CG9924                                        | 1.52 | 0.00 |
| FBgn0001122 | G-oalpha47A | G protein oalpha 47A                          | 1.52 | 0.01 |
| FBgn0027049 | DDB1        | DDB1                                          | 1.52 | 0.00 |
| FBgn0032935 | CG8678      | CG8678                                        | 1.52 | 0.00 |
| FBgn0034032 | CG8195      | CG8195                                        | 1.52 | 0.00 |
| FBgn0000253 | Cam         | Calmodulin                                    | 1.52 | 0.01 |

|             |         |                                  |      |      |
|-------------|---------|----------------------------------|------|------|
| FBgn0032859 | Arc-p34 | Arc-p34                          | 1.52 | 0.00 |
| FBgn0003276 | Rpl140  | RNA polymerase II 140kD subunit  | 1.52 | 0.00 |
| FBgn0029878 | Pat1    | Pat1                             | 1.52 | 0.00 |
| FBgn0036814 | CG14073 | CG14073                          | 1.52 | 0.00 |
| FBgn0003731 | Egfr    | Epidermal growth factor receptor | 1.52 | 0.01 |
| FBgn0035968 | CG4484  | CG4484                           | 1.52 | 0.00 |
| FBgn0005630 | lola    | longitudinals lacking            | 1.52 | 0.00 |
| FBgn0035030 | pio     | piopio                           | 1.51 | 0.01 |
| FBgn0020386 | Pk61C   | Protein kinase 61C               | 1.51 | 0.00 |
| FBgn0030623 | CG15031 | CG15031                          | 1.51 | 0.00 |
| FBgn0010300 | brat    | brain tumor                      | 1.51 | 0.00 |
| FBgn0001255 | ImpE3   | Ecdysone-inducible gene E3       | 1.51 | 0.00 |
| FBgn0035647 | CG10486 | CG10486                          | 1.51 | 0.00 |
| FBgn0037652 | CG11980 | CG11980                          | 1.51 | 0.00 |
| FBgn0053178 | CG33178 | CG33178                          | 1.51 | 0.00 |
| FBgn0037620 | CG9793  | CG9793                           | 1.51 | 0.00 |
| FBgn0032901 | CG9339  | CG9339                           | 1.51 | 0.00 |
| FBgn0035675 | CG6610  | CG6610                           | 1.51 | 0.00 |
| FBgn0036000 | CG3434  | CG3434                           | 1.51 | 0.00 |
| FBgn0039277 | CG13650 | CG13650                          | 1.51 | 0.00 |
| FBgn0004401 | Pep     | Protein on ecdysone puffs        | 1.51 | 0.00 |
| FBgn0031043 | CG14222 | CG14222                          | 1.51 | 0.00 |
| FBgn0032752 | CG10702 | CG10702                          | 1.51 | 0.00 |
| FBgn0036438 | CG13477 | CG13477                          | 1.51 | 0.01 |
| FBgn0026575 | hang    | hangover                         | 1.51 | 0.00 |
| FBgn0033963 | CG12857 | CG12857                          | 1.51 | 0.00 |
| FBgn0035808 | SP2523  | SP2523                           | 1.51 | 0.00 |
| FBgn0039338 | XNP     | XNP                              | 1.51 | 0.00 |
| FBgn0033676 | CG17509 | CG17509                          | 1.51 | 0.00 |
| FBgn0034933 | CG3735  | CG3735                           | 1.51 | 0.00 |
| FBgn0036707 | CG13724 | CG13724                          | 1.51 | 0.00 |
| FBgn0034914 | CG5554  | CG5554                           | 1.51 | 0.00 |
| FBgn0031875 | CG3430  | CG3430                           | 1.51 | 0.00 |
| FBgn0030739 | CG13957 | CG13957                          | 1.51 | 0.00 |
| FBgn0030701 | CG16952 | CG16952                          | 1.51 | 0.00 |
| FBgn0033968 | CG10200 | CG10200                          | 1.51 | 0.00 |

|             |            |                                            |       |      |
|-------------|------------|--------------------------------------------|-------|------|
| FBgn0032016 | CG7818     | CG7818                                     | 1.51  | 0.00 |
| FBgn0015602 | BEAF-32    | Boundary element-associated factor of 32kD | 1.51  | 0.00 |
| FBgn0036772 | CG5290     | CG5290                                     | 1.51  | 0.01 |
| FBgn0039577 | CG12516    | CG12516                                    | 1.51  | 0.00 |
| FBgn0037307 | Tim17a2    | Tim17a2                                    | 1.51  | 0.00 |
| FBgn0005672 | spi        | spitz                                      | 1.51  | 0.00 |
| FBgn0023417 | AP-2       | AP-2                                       | 1.51  | 0.00 |
| FBgn0032002 | CG8353     | CG8353                                     | 1.51  | 0.00 |
| FBgn0038209 | CG9722     | CG9722                                     | 1.51  | 0.00 |
| FBgn0031284 | CG3876     | CG3876                                     | 1.50  | 0.00 |
| FBgn0033081 | geminin    | geminin                                    | 1.50  | 0.00 |
| FBgn0027936 | vih        | vihar                                      | 1.50  | 0.00 |
| FBgn0031623 | Taf12L     | TBP-associated factor 30kD subunit alpha-2 | 1.50  | 0.00 |
| FBgn0031023 | CG14200    | CG14200                                    | 1.50  | 0.00 |
| FBgn0034985 | CG3328     | CG3328                                     | 1.50  | 0.00 |
| FBgn0035812 | CG7457     | CG7457                                     | 1.50  | 0.00 |
| FBgn0029959 | Rab39      | Rab39                                      | 1.50  | 0.00 |
| FBgn0036443 | CG13471    | CG13471                                    | 1.50  | 0.00 |
| FBgn0036927 | CG7433     | CG7433                                     | 1.50  | 0.00 |
| FBgn0036580 | PDCD-5     | PDCD-5                                     | 1.50  | 0.00 |
| FBgn0043903 | dome       | domeless                                   | 1.50  | 0.00 |
| FBgn0034713 | CG11291    | CG11291                                    | 1.50  | 0.00 |
| FBgn0038476 | kuk        | kugelkern                                  | 1.50  | 0.01 |
| FBgn0030384 | CG2577     | CG2577                                     | 1.50  | 0.00 |
| FBgn0036785 | CG13700    | CG13700                                    | 1.50  | 0.00 |
| FBgn0040938 | CG33557    | CG33557                                    | -1.50 | 0.00 |
| FBgn0032310 | CG17086    | CG17086                                    | -1.50 | 0.00 |
| FBgn0021847 | l(2)k14710 | lethal (2) k14710                          | -1.50 | 0.00 |
| FBgn0038467 | CG3590     | CG3590                                     | -1.50 | 0.00 |
| FBgn0035511 | CG15007    | CG15007                                    | -1.50 | 0.00 |
| FBgn0030665 | CG15646    | CG15646                                    | -1.50 | 0.00 |
| FBgn0010591 | Sply       | Sphingosine-1-phosphate lyase              | -1.50 | 0.00 |
| FBgn0000116 | Argk       | Arginine kinase                            | -1.50 | 0.00 |
| FBgn0029862 | CG12219    | CG12219                                    | -1.50 | 0.00 |
| FBgn0053179 | beat-IIIb  | beat-IIIb                                  | -1.50 | 0.05 |
| FBgn0031036 | CG14220    | CG14220                                    | -1.50 | 0.00 |

|             |         |                                  |       |      |
|-------------|---------|----------------------------------|-------|------|
| FBgn0039702 | Vps16B  | Vps16B                           | -1.50 | 0.00 |
| FBgn0035344 | Cyp4d20 | Cyp4d20                          | -1.50 | 0.00 |
| FBgn0037116 | CG7158  | CG7158                           | -1.50 | 0.00 |
| FBgn0033108 | CG15236 | CG15236                          | -1.51 | 0.00 |
| FBgn0034144 | CG5089  | CG5089                           | -1.51 | 0.00 |
| FBgn0030035 | CG11190 | CG11190                          | -1.51 | 0.00 |
| FBgn0050410 | CG30410 | CG30410                          | -1.51 | 0.00 |
| FBgn0035938 | orb2    | orb2                             | -1.51 | 0.00 |
| FBgn0052056 | CG32056 | CG32056                          | -1.51 | 0.00 |
| FBgn0051037 | ca      | claret                           | -1.51 | 0.00 |
| FBgn0052521 | CG32521 | CG32521                          | -1.51 | 0.00 |
| FBgn0051956 | pgant4  | polypeptide GalNAc transferase 4 | -1.51 | 0.00 |
| FBgn0036422 | CG3868  | CG3868                           | -1.51 | 0.00 |
| FBgn0040823 | dpr6    | dpr6                             | -1.51 | 0.00 |
| FBgn0030359 | CG18130 | CG18130                          | -1.51 | 0.00 |
| FBgn0022935 | D19A    | D19A                             | -1.51 | 0.00 |
| FBgn0035530 | dyl     | dusky-like                       | -1.51 | 0.00 |
| FBgn0037070 | CG11309 | CG11309                          | -1.51 | 0.00 |
| FBgn0052737 | CG33691 | CG33691                          | -1.51 | 0.00 |
| FBgn0031100 | CG1504  | CG1504                           | -1.51 | 0.00 |
| FBgn0040388 | CG32796 | CG32796                          | -1.51 | 0.00 |
| FBgn0032616 | CG31781 | CG31781                          | -1.51 | 0.00 |
| FBgn0034455 | CG11007 | CG11007                          | -1.51 | 0.00 |
| FBgn0034052 | CG8299  | CG8299                           | -1.51 | 0.00 |
| FBgn0034731 | CG10384 | CG10384                          | -1.51 | 0.00 |
| FBgn0020642 | Lcp65Ac | Lcp65Ac                          | -1.51 | 0.00 |
| FBgn0034431 | Tab2    | Tab2                             | -1.51 | 0.00 |
| FBgn0034496 | CG9143  | CG9143                           | -1.51 | 0.00 |
| FBgn0038042 | Scgbeta | Sarcoglycan beta                 | -1.51 | 0.00 |
| FBgn0034883 | CG17664 | CG17664                          | -1.51 | 0.00 |
| FBgn0030769 | CG13012 | CG13012                          | -1.51 | 0.00 |
| FBgn0052206 | CG32206 | CG32206                          | -1.51 | 0.01 |
| FBgn0029858 | CG15896 | CG15896                          | -1.51 | 0.00 |
| FBgn0028920 | CG8997  | CG8997                           | -1.51 | 0.00 |
| FBgn0032504 | CG16970 | CG16970                          | -1.51 | 0.00 |
| FBgn0032143 | CG4017  | CG4017                           | -1.51 | 0.00 |

|             |             |                                     |       |      |
|-------------|-------------|-------------------------------------|-------|------|
| FBgn0001145 | Gs2         | Glutamine synthetase 2              | -1.51 | 0.02 |
| FBgn0027544 | CG2217      | CG2217                              | -1.52 | 0.00 |
| FBgn0034085 | Ptp52F      | Ptp52F                              | -1.52 | 0.00 |
| FBgn0038039 | CG5196      | CG5196                              | -1.52 | 0.00 |
| FBgn0050174 | CG30174     | CG30174                             | -1.52 | 0.00 |
| FBgn0036017 | CG3280      | CG3280                              | -1.52 | 0.01 |
| FBgn0051676 | CG31676     | CG31676                             | -1.52 | 0.00 |
| FBgn0033377 | Pmm45A      | Phosphomannomutase 45A              | -1.52 | 0.00 |
| FBgn0028687 | Rpt1        | Rpt1                                | -1.52 | 0.00 |
| FBgn0029605 | CG18082     | CG18082                             | -1.52 | 0.01 |
| FBgn0036557 | mRpS31      | mitochondrial ribosomal protein S31 | -1.52 | 0.00 |
| FBgn0030011 | Gbeta5      | Gbeta5                              | -1.52 | 0.00 |
| FBgn0032720 | mRpL13      | mitochondrial ribosomal protein L13 | -1.52 | 0.00 |
| FBgn0015036 | Cyp4ae1     | Cytochrome P450-4ae1                | -1.52 | 0.00 |
| FBgn0031132 | CG15450     | CG15450                             | -1.52 | 0.00 |
| FBgn0028388 | capt        | capulet                             | -1.52 | 0.00 |
| FBgn0034858 | eIF2B-delta | eIF2B-delta                         | -1.52 | 0.00 |
| FBgn0031850 | Tsp         | Thrombospondin                      | -1.52 | 0.00 |
| FBgn0034129 | CG15925     | CG15925                             | -1.52 | 0.00 |
| FBgn0039391 | CG8934      | CG8934                              | -1.52 | 0.00 |
| FBgn0035059 | CG3894      | CG3894                              | -1.52 | 0.00 |
| FBgn0034876 | CG3957      | CG3957                              | -1.52 | 0.00 |
| FBgn0025698 | CG5594      | CG5594                              | -1.52 | 0.00 |
| FBgn0033166 | CG11166     | CG11166                             | -1.52 | 0.00 |
| FBgn0037375 | CG1193      | CG1193                              | -1.52 | 0.00 |
| FBgn0035374 | mRpS35      | mitochondrial ribosomal protein S35 | -1.52 | 0.00 |
| FBgn0040889 | CG33253     | CG33253                             | -1.53 | 0.00 |
| FBgn0038017 | CG4115      | CG4115                              | -1.53 | 0.00 |
| FBgn0031782 | CG9226      | CG9226                              | -1.53 | 0.00 |
| FBgn0039626 | CG1420      | CG1420                              | -1.53 | 0.00 |
| FBgn0010786 | l(3)02640   | lethal (3) 02640                    | -1.53 | 0.00 |
| FBgn0033501 | CG12911     | CG12911                             | -1.53 | 0.00 |
| FBgn0024362 | CG11412     | CG11412                             | -1.53 | 0.00 |
| FBgn0034132 | CG4439      | CG4439                              | -1.53 | 0.01 |
| FBgn0040553 | CG14374     | CG14374                             | -1.53 | 0.01 |
| FBgn0004915 | TfIIIB      | Transcription factor IIB            | -1.53 | 0.00 |

|             |           |                                           |       |      |
|-------------|-----------|-------------------------------------------|-------|------|
| FBgn0051708 | CG31708   | CG31708                                   | -1.53 | 0.00 |
| FBgn0042187 | CG17234   | CG17234                                   | -1.53 | 0.00 |
| FBgn0030540 | CG11581   | CG11581                                   | -1.53 | 0.00 |
| FBgn0035979 | CG4446    | CG4446                                    | -1.53 | 0.00 |
| FBgn0031836 | CG11050   | CG11050                                   | -1.53 | 0.00 |
| FBgn0036143 | CG14142   | CG14142                                   | -1.53 | 0.02 |
| FBgn0026619 | tafazzin  | tafazzin                                  | -1.53 | 0.00 |
| FBgn0030892 | CG7206    | CG7206                                    | -1.53 | 0.00 |
| FBgn0037607 | CG8036    | CG8036                                    | -1.53 | 0.00 |
| FBgn0000077 | amx       | almondex                                  | -1.53 | 0.00 |
| FBgn0001170 | H2.0      | Homeodomain protein 2.0                   | -1.53 | 0.00 |
| FBgn0037428 | Osi18     | Osiris 18                                 | -1.53 | 0.02 |
| FBgn0010830 | l(3)04053 | lethal (3) 04053                          | -1.53 | 0.00 |
| FBgn0016672 | lpp       | Inositol polyphosphate 1-phosphatase      | -1.53 | 0.00 |
| FBgn0039156 | CG6178    | CG6178                                    | -1.53 | 0.00 |
| FBgn0027550 | CG6495    | CG6495                                    | -1.53 | 0.00 |
| FBgn0003651 | svp       | seven up                                  | -1.53 | 0.00 |
| FBgn0035348 | CG16758   | CG16758                                   | -1.53 | 0.00 |
| FBgn0030543 | CG11585   | CG11585                                   | -1.53 | 0.00 |
| FBgn0032663 | CG15153   | CG15153                                   | -1.53 | 0.00 |
| FBgn0030826 | CG12995   | CG12995                                   | -1.53 | 0.00 |
| FBgn0037563 | CG11672   | CG11672                                   | -1.53 | 0.00 |
| FBgn0035358 | CG14949   | CG14949                                   | -1.54 | 0.00 |
| FBgn0019643 | Dat       | Dopamine N acetyltransferase              | -1.54 | 0.00 |
| FBgn0039741 | CG7943    | CG7943                                    | -1.54 | 0.00 |
| FBgn0002622 | RpS3      | Ribosomal protein S3                      | -1.54 | 0.00 |
| FBgn0031930 | CG7025    | CG7025                                    | -1.54 | 0.00 |
| FBgn0030610 | CG9065    | CG9065                                    | -1.54 | 0.00 |
| FBgn0052940 | Pif1A     | PFTAIRE-interacting factor 1A             | -1.54 | 0.02 |
| FBgn0037122 | CG14570   | CG14570                                   | -1.54 | 0.00 |
| FBgn0033659 | Damm      | Death associated molecule related to Mch2 | -1.54 | 0.00 |
| FBgn0030901 | CG33639   | CG33639                                   | -1.54 | 0.00 |
| FBgn0040393 | CG14265   | CG14265                                   | -1.54 | 0.00 |
| FBgn0032006 | Pvr       | PDGF- and VEGF-receptor related           | -1.54 | 0.00 |
| FBgn0035856 | CG13679   | CG13679                                   | -1.54 | 0.00 |
| FBgn0001205 | Hmgcr     | HMG Coenzyme A reductase                  | -1.54 | 0.00 |

|             |         |                                                |       |      |
|-------------|---------|------------------------------------------------|-------|------|
| FBgn0035035 | CG3570  | CG3570                                         | -1.54 | 0.00 |
| FBgn0036873 | CG18294 | CG18294                                        | -1.54 | 0.00 |
| FBgn0037687 | CG8132  | CG8132                                         | -1.54 | 0.00 |
| FBgn0023519 | mRpL16  | mitochondrial ribosomal protein L16            | -1.54 | 0.00 |
| FBgn0040548 | dpr4    | dpr4                                           | -1.54 | 0.00 |
| FBgn0030433 | mRpL49  | mitochondrial ribosomal protein L49            | -1.54 | 0.00 |
| FBgn0030991 | CG7453  | CG7453                                         | -1.55 | 0.00 |
| FBgn0031637 | CG2950  | CG2950                                         | -1.55 | 0.00 |
| FBgn0031436 | CG3214  | CG3214                                         | -1.55 | 0.00 |
| FBgn0034646 | Rae1    | Rae1                                           | -1.55 | 0.00 |
| FBgn0051326 | CG31326 | CG31326                                        | -1.55 | 0.00 |
| FBgn0027073 | CG4302  | CG4302                                         | -1.55 | 0.00 |
| FBgn0039363 | LpR1    | LpR1                                           | -1.55 | 0.00 |
| FBgn0004374 | neb     | nebbish                                        | -1.55 | 0.00 |
| FBgn0024947 | NTPase  | NTPase                                         | -1.55 | 0.00 |
| FBgn0033917 | CG8503  | CG8503                                         | -1.55 | 0.00 |
| FBgn0031688 | Cyp28d2 | Cyp28d2                                        | -1.55 | 0.00 |
| FBgn0030552 | mRpL38  | mitochondrial ribosomal protein L38            | -1.55 | 0.00 |
| FBgn0034938 | CG3803  | CG3803                                         | -1.55 | 0.00 |
| FBgn0015324 | Vha26   | Vacuolar H <sup>+</sup> -ATPase 26kD E subunit | -1.55 | 0.00 |
| FBgn0026430 | Grip84  | gamma-tubulin ring protein 84                  | -1.55 | 0.00 |
| FBgn0051634 | Oatp26F | Organic anion transporting polypeptide 26F     | -1.55 | 0.00 |
| FBgn0034697 | GM130   | GM130                                          | -1.55 | 0.00 |
| FBgn0031357 | mRpL48  | mitochondrial ribosomal protein L48            | -1.55 | 0.00 |
| FBgn0039694 | fig     | fos intronic gene                              | -1.55 | 0.00 |
| FBgn0032167 | CG5853  | CG5853                                         | -1.55 | 0.00 |
| FBgn0004133 | blow    | blown fuse                                     | -1.55 | 0.00 |
| FBgn0027779 | VhaSFD  | Vacuolar H <sup>+</sup> -ATPase SFD subunit    | -1.55 | 0.00 |
| FBgn0011232 | scat    | scattered                                      | -1.55 | 0.00 |
| FBgn0029722 | CG7024  | CG7024                                         | -1.55 | 0.00 |
| FBgn0015608 | Ca-beta | Ca <sup>2+</sup> -channel-protein-beta-subunit | -1.55 | 0.00 |
| FBgn0039676 | ppk20   | pickpocket 20                                  | -1.55 | 0.00 |
| FBgn0030643 | CG15641 | CG15641                                        | -1.55 | 0.00 |
| FBgn0035392 | CG1271  | CG1271                                         | -1.55 | 0.00 |
| FBgn0039931 | sphinx  | sphinx                                         | -1.55 | 0.00 |
| FBgn0000163 | baz     | bazooka                                        | -1.55 | 0.00 |

|             |             |                                           |       |      |
|-------------|-------------|-------------------------------------------|-------|------|
| FBgn0037102 | CG7172      | CG7172                                    | -1.55 | 0.00 |
| FBgn0050118 | CG30118     | CG30118                                   | -1.55 | 0.00 |
| FBgn0015240 | Hr96        | Hormone receptor-like in 96               | -1.55 | 0.00 |
| FBgn0040536 | CG12418     | CG12418                                   | -1.56 | 0.00 |
| FBgn0030679 | CG8206      | CG8206                                    | -1.56 | 0.00 |
| FBgn0034267 | CG4984      | CG4984                                    | -1.56 | 0.00 |
| FBgn0039780 | PH4alphaNE1 | prolyl-4-hydroxylase-alpha NE1            | -1.56 | 0.00 |
| FBgn0023495 | Lip3        | Lip3                                      | -1.56 | 0.01 |
| FBgn0031129 | CG1324      | CG1324                                    | -1.56 | 0.00 |
| FBgn0031639 | mRpS2       | mitochondrial ribosomal protein S2        | -1.56 | 0.00 |
| FBgn0036833 | CG3819      | CG3819                                    | -1.56 | 0.00 |
| FBgn0035282 | CG13936     | CG13936                                   | -1.56 | 0.00 |
| FBgn0001332 | L           | Lobe                                      | -1.56 | 0.00 |
| FBgn0024189 | sns         | sticks and stones                         | -1.56 | 0.00 |
| FBgn0036994 | CG5199      | CG5199                                    | -1.56 | 0.00 |
| FBgn0021944 | Coprox      | Coproporphyrinogen oxidase                | -1.56 | 0.00 |
| FBgn0033102 | Epac        | Epac                                      | -1.56 | 0.00 |
| FBgn0039645 | CG11898     | CG11898                                   | -1.56 | 0.00 |
| FBgn0015808 | ScpX        | Sterol carrier protein X-related thiolase | -1.56 | 0.00 |
| FBgn0016047 | nompA       | no mechanoreceptor potential A            | -1.56 | 0.00 |
| FBgn0040798 | CG13069     | CG13069                                   | -1.56 | 0.05 |
| FBgn0011284 | RpS4        | Ribosomal protein S4                      | -1.56 | 0.00 |
| FBgn0034197 | CG15918     | CG15918                                   | -1.56 | 0.00 |
| FBgn0002023 | Lim3        | Lim3                                      | -1.56 | 0.00 |
| FBgn0036334 | CG11267     | CG11267                                   | -1.56 | 0.00 |
| FBgn0028931 | CG16863     | CG16863                                   | -1.57 | 0.00 |
| FBgn0038168 | CG9591      | CG9591                                    | -1.57 | 0.00 |
| FBgn0035954 | Doc3        | Dorsocross3                               | -1.57 | 0.00 |
| FBgn0052485 | CG32485     | CG32485                                   | -1.57 | 0.00 |
| FBgn0024988 | CG14801     | CG14801                                   | -1.57 | 0.00 |
| FBgn0027794 | CG14786     | CG14786                                   | -1.57 | 0.00 |
| FBgn0030346 | CG11802     | CG11802                                   | -1.57 | 0.00 |
| FBgn0034579 | mRpL54      | mitochondrial ribosomal protein L54       | -1.57 | 0.00 |
| FBgn0040281 | Aplip1      | APP-like protein interacting protein 1    | -1.57 | 0.00 |
| FBgn0038450 | CG17560     | CG17560                                   | -1.57 | 0.00 |
| FBgn0029629 | CG8636      | CG8636                                    | -1.57 | 0.00 |



|             |             |                                                     |       |      |
|-------------|-------------|-----------------------------------------------------|-------|------|
| FBgn0040628 | CG18672     | CG18672                                             | -1.57 | 0.01 |
| FBgn0035032 | CG4692      | CG4692                                              | -1.57 | 0.00 |
| FBgn0010241 | Mdr50       | Multi drug resistance 50                            | -1.57 | 0.00 |
| FBgn0052454 | CG32454     | CG32454                                             | -1.57 | 0.00 |
| FBgn0035126 | CG13882     | CG13882                                             | -1.57 | 0.00 |
| FBgn0033507 | CG12909     | CG12909                                             | -1.57 | 0.00 |
| FBgn0042083 | CG3267      | CG3267                                              | -1.57 | 0.00 |
| FBgn0005674 | Aats-glupro | Glutamyl-prolyl-tRNA synthetase                     | -1.57 | 0.00 |
| FBgn0040773 | CG2249      | CG2249                                              | -1.57 | 0.00 |
| FBgn0037093 | CG7597      | CG7597                                              | -1.57 | 0.00 |
| FBgn0034238 | CG18432     | CG18432                                             | -1.57 | 0.00 |
| FBgn0037469 | CG1939      | CG1939                                              | -1.57 | 0.00 |
| FBgn0029639 | CG14419     | CG14419                                             | -1.57 | 0.00 |
| FBgn0053156 | CG33156     | CG33156                                             | -1.57 | 0.00 |
| FBgn0030839 | CG5613      | CG5613                                              | -1.57 | 0.00 |
| FBgn0032882 | CG9320      | CG9320                                              | -1.57 | 0.00 |
| FBgn0029609 | l(1)G0144   | lethal (1) G0144                                    | -1.57 | 0.00 |
| FBgn0033380 | Phax        | Phosphorylated adaptor for RNA export               | -1.57 | 0.00 |
| FBgn0023169 | SNF1A       | SNF1A/AMP-activated protein kinase                  | -1.57 | 0.00 |
| FBgn0033808 | CG4627      | CG4627                                              | -1.57 | 0.00 |
| FBgn0029850 | CG14446     | CG14446                                             | -1.57 | 0.00 |
| FBgn0026079 | CG6133      | CG6133                                              | -1.57 | 0.00 |
| FBgn0036698 | CG7724      | CG7724                                              | -1.57 | 0.00 |
| FBgn0004655 | wapl        | wings apart-like                                    | -1.58 | 0.00 |
| FBgn0053146 | Mctp        | Multiple C2 domain and transmembrane region protein | -1.58 | 0.00 |
| FBgn0035503 | nab         | nab                                                 | -1.58 | 0.00 |
| FBgn0005585 | Crc         | Calreticulin                                        | -1.58 | 0.00 |
| FBgn0015576 | alpha-Est8  | alpha-Esterase-8                                    | -1.58 | 0.00 |
| FBgn0053154 | CG13175     | CG13175                                             | -1.58 | 0.00 |
| FBgn0033058 | CG14593     | CG14593                                             | -1.58 | 0.00 |
| FBgn0024998 | CG2685      | CG2685                                              | -1.58 | 0.00 |
| FBgn0013763 | Chit        | Chitinase-like                                      | -1.58 | 0.00 |
| FBgn0032131 | CG3841      | CG3841                                              | -1.58 | 0.00 |
| FBgn0022700 | Cht4        | Chitinase 4                                         | -1.58 | 0.00 |
| FBgn0037530 | CG2943      | CG2943                                              | -1.58 | 0.00 |
| FBgn0051797 | CG31797     | CG31797                                             | -1.58 | 0.00 |

|             |            |                                                     |       |      |
|-------------|------------|-----------------------------------------------------|-------|------|
| FBgn0039580 | Gfat2      | Glutamine:fructose-6-phosphate aminotransferase 2   | -1.58 | 0.00 |
| FBgn0040801 | CG13053    | CG13053                                             | -1.58 | 0.00 |
| FBgn0034877 | CG17280    | CG17280                                             | -1.58 | 0.00 |
| FBgn0026173 | slim       | scruin like at the midline                          | -1.58 | 0.00 |
| FBgn0034888 | CG5431     | CG5431                                              | -1.58 | 0.00 |
| FBgn0034087 | CG8443     | CG8443                                              | -1.58 | 0.00 |
| FBgn0031050 | Arp11      | Arp11                                               | -1.58 | 0.00 |
| FBgn0039112 | CG10219    | CG10219                                             | -1.58 | 0.00 |
| FBgn0033075 | Pld        | Phospholipase D                                     | -1.58 | 0.00 |
| FBgn0036272 | CG4300     | CG4300                                              | -1.58 | 0.00 |
| FBgn0023441 | fus        | fusilli                                             | -1.59 | 0.00 |
| FBgn0039667 | CG2010     | CG2010                                              | -1.59 | 0.00 |
| FBgn0003475 | spir       | spire                                               | -1.59 | 0.00 |
| FBgn0037610 | CG8043     | CG8043                                              | -1.59 | 0.00 |
| FBgn0015788 | ltd        | lightoid                                            | -1.59 | 0.00 |
| FBgn0030265 | CG11126    | CG11126                                             | -1.59 | 0.00 |
| FBgn0030688 | CG8952     | CG8952                                              | -1.59 | 0.00 |
| FBgn0020623 | Pal        | Peptidyl-alpha-hydroxyglycine-alpha-amidating lyase | -1.59 | 0.00 |
| FBgn0028646 | aralar1    | aralar1                                             | -1.59 | 0.00 |
| FBgn0033224 | CG1553     | CG1553                                              | -1.59 | 0.00 |
| FBgn0035029 | IFa        | IFamide                                             | -1.59 | 0.00 |
| FBgn0033045 | CG12551    | CG12551                                             | -1.59 | 0.00 |
| FBgn0036612 | CG4998     | CG4998                                              | -1.59 | 0.00 |
| FBgn0021825 | Dmn        | Dynamitin                                           | -1.59 | 0.00 |
| FBgn0033783 | CG17019    | CG17019                                             | -1.59 | 0.00 |
| FBgn0027836 | Dgp-1      | Dgp-1                                               | -1.59 | 0.00 |
| FBgn0052648 | Pde9       | Phosphodiesterase 9                                 | -1.59 | 0.00 |
| FBgn0039840 | CG11340    | CG11340                                             | -1.59 | 0.00 |
| FBgn0050097 | Menl-1     | Menl-1                                              | -1.59 | 0.00 |
| FBgn0033160 | CG11107    | CG11107                                             | -1.59 | 0.00 |
| FBgn0052750 | CG32750    | CG32750                                             | -1.59 | 0.00 |
| FBgn0025645 | CG3598     | CG3598                                              | -1.59 | 0.00 |
| FBgn0025627 | CG4194     | CG4194                                              | -1.59 | 0.00 |
| FBgn0015591 | Ast        | Allatostatin                                        | -1.59 | 0.00 |
| FBgn0015571 | alpha-Est3 | alpha-Esterase-3                                    | -1.60 | 0.00 |
| FBgn0010808 | l(3)03670  | lethal (3) 03670                                    | -1.60 | 0.00 |

|             |         |                                   |       |      |
|-------------|---------|-----------------------------------|-------|------|
| FBgn0031514 | CG3332  | CG3332                            | -1.60 | 0.00 |
| FBgn0030605 | CG5548  | CG5548                            | -1.60 | 0.00 |
| FBgn0033454 | CG1671  | CG1671                            | -1.60 | 0.00 |
| FBgn0035651 | CG33523 | CG33523                           | -1.60 | 0.00 |
| FBgn0053214 | CG33214 | CG33214                           | -1.60 | 0.00 |
| FBgn0000357 | Cp18    | Chorion protein 18                | -1.60 | 0.00 |
| FBgn0028665 | VhaAC39 | VhaAC39                           | -1.60 | 0.00 |
| FBgn0037051 | CG10565 | CG10565                           | -1.60 | 0.00 |
| FBgn0025937 | cmp44E  | conserved membrane protein at 44E | -1.60 | 0.00 |
| FBgn0032832 | CG10662 | CG10662                           | -1.60 | 0.00 |
| FBgn0037969 | CG18347 | CG18347                           | -1.60 | 0.00 |
| FBgn0053113 | Rtnl1   | Rtnl1                             | -1.60 | 0.00 |
| FBgn0038376 | CG4225  | CG4225                            | -1.60 | 0.00 |
| FBgn0029716 | CG3546  | CG3546                            | -1.60 | 0.00 |
| FBgn0015001 | iotaTry | iotaTrypsin                       | -1.60 | 0.00 |
| FBgn0029994 | CG2254  | CG2254                            | -1.60 | 0.00 |
| FBgn0036592 | CG13049 | CG13049                           | -1.60 | 0.00 |
| FBgn0023458 | CG3585  | CG3585                            | -1.60 | 0.00 |
| FBgn0024997 | CG2681  | CG2681                            | -1.60 | 0.00 |
| FBgn0037384 | CG10981 | CG10981                           | -1.60 | 0.00 |
| FBgn0010621 | Cct5    | T-complex Chaperonin 5            | -1.60 | 0.00 |
| FBgn0003557 | Su(dx)  | Suppressor of deltex              | -1.60 | 0.00 |
| FBgn0003065 | CG2150  | CG2150                            | -1.60 | 0.00 |
| FBgn0040616 | CG12871 | CG12871                           | -1.60 | 0.00 |
| FBgn0034293 | CG14495 | CG14495                           | -1.61 | 0.00 |
| FBgn0039443 | CG14242 | CG14242                           | -1.61 | 0.00 |
| FBgn0039648 | CG14515 | CG14515                           | -1.61 | 0.00 |
| FBgn0037057 | CG10512 | CG10512                           | -1.61 | 0.00 |
| FBgn0039820 | CG15554 | CG15554                           | -1.61 | 0.00 |
| FBgn0034793 | asrij   | asrij                             | -1.61 | 0.00 |
| FBgn0003861 | trp     | transient receptor potential      | -1.61 | 0.00 |
| FBgn0038276 | CG7026  | CG7026                            | -1.61 | 0.00 |
| FBgn0035271 | CG2021  | CG2021                            | -1.61 | 0.00 |
| FBgn0026718 | fu12    | fu12                              | -1.61 | 0.00 |
| FBgn0004779 | Ccp84Ae | Ccp84Ae                           | -1.61 | 0.00 |
| FBgn0032883 | CG9323  | CG9323                            | -1.61 | 0.00 |

|             |          |                                    |       |      |
|-------------|----------|------------------------------------|-------|------|
| FBgn0027453 | Dnz1     | DNZDHC/NEW1 zinc finger protein 11 | -1.61 | 0.00 |
| FBgn0036975 | CG5618   | CG5618                             | -1.61 | 0.00 |
| FBgn0031085 | CG9570   | CG9570                             | -1.61 | 0.00 |
| FBgn0036589 | CG13067  | CG13067                            | -1.61 | 0.00 |
| FBgn0053209 | comm3    | comm3                              | -1.61 | 0.00 |
| FBgn0051937 | CG31937  | CG31937                            | -1.61 | 0.00 |
| FBgn0035371 | CG9977   | CG9977                             | -1.61 | 0.00 |
| FBgn0031117 | CG1702   | CG1702                             | -1.61 | 0.00 |
| FBgn0034899 | CG13560  | CG13560                            | -1.62 | 0.00 |
| FBgn0031945 | CG7191   | CG7191                             | -1.62 | 0.00 |
| FBgn0037414 | Osi7     | Osiris 7                           | -1.62 | 0.00 |
| FBgn0027560 | Tps1     | Trehalose-6-phosphate synthase 1   | -1.62 | 0.00 |
| FBgn0029748 | CG15464  | CG15464                            | -1.62 | 0.00 |
| FBgn0030975 | CG7349   | CG7349                             | -1.62 | 0.00 |
| FBgn0036623 | CG4729   | CG4729                             | -1.62 | 0.00 |
| FBgn0034718 | wdp      | windpipe                           | -1.62 | 0.00 |
| FBgn0040257 | Ugt86Dc  | Ugt86Dc                            | -1.62 | 0.00 |
| FBgn0010294 | ng2      | new glue 2                         | -1.62 | 0.00 |
| FBgn0039689 | CG7598   | CG7598                             | -1.62 | 0.00 |
| FBgn0032449 | CG17036  | CG17036                            | -1.62 | 0.00 |
| FBgn0032646 | CG6412   | CG6412                             | -1.62 | 0.00 |
| FBgn0031002 | CG14196  | CG14196                            | -1.62 | 0.00 |
| FBgn0032945 | CG8665   | CG8665                             | -1.62 | 0.01 |
| FBgn0000644 | Fcp3C    | Follicle cell protein 3C           | -1.62 | 0.00 |
| FBgn0034427 | CG10474  | CG10474                            | -1.62 | 0.00 |
| FBgn0038130 | CG8630   | CG8630                             | -1.62 | 0.00 |
| FBgn0033204 | CG2065   | CG2065                             | -1.62 | 0.00 |
| FBgn0035361 | Aats-pro | Prolyl-tRNA synthetase             | -1.62 | 0.00 |
| FBgn0050350 | CG30350  | CG30350                            | -1.62 | 0.00 |
| FBgn0015234 | HLH106   | Helix loop helix protein 106       | -1.62 | 0.00 |
| FBgn0033584 | CG7737   | CG7737                             | -1.62 | 0.00 |
| FBgn0029967 | CG15327  | CG15327                            | -1.62 | 0.00 |
| FBgn0029851 | CG14445  | CG14445                            | -1.63 | 0.00 |
| FBgn0034420 | CG10737  | CG10737                            | -1.63 | 0.01 |
| FBgn0031418 | CG3609   | CG3609                             | -1.63 | 0.00 |
| FBgn0039856 | CG1774   | CG1774                             | -1.63 | 0.00 |

|             |          |                                            |       |      |
|-------------|----------|--------------------------------------------|-------|------|
| FBgn0035930 | CG13307  | CG13307                                    | -1.63 | 0.00 |
| FBgn0016687 | Nurf-38  | Nucleosome remodeling factor - 38kD        | -1.63 | 0.00 |
| FBgn0033733 | CG8834   | CG8834                                     | -1.63 | 0.00 |
| FBgn0023407 | B4       | B4                                         | -1.63 | 0.00 |
| FBgn0036318 | CG11009  | CG11009                                    | -1.63 | 0.00 |
| FBgn0002069 | Aats-asp | Aspartyl-tRNA synthetase                   | -1.63 | 0.00 |
| FBgn0017429 | CG5989   | CG5989                                     | -1.63 | 0.00 |
| FBgn0033914 | CG8479   | CG8479                                     | -1.63 | 0.00 |
| FBgn0050115 | CG30115  | CG30115                                    | -1.63 | 0.00 |
| FBgn0015245 | Hsp60    | Heat shock protein 60                      | -1.63 | 0.00 |
| FBgn0036135 | mRpL2    | mitochondrial ribosomal protein L2         | -1.63 | 0.00 |
| FBgn0032719 | CG17321  | CG17321                                    | -1.63 | 0.00 |
| FBgn0035154 | CG3344   | CG3344                                     | -1.63 | 0.00 |
| FBgn0031812 | CG9523   | CG9523                                     | -1.63 | 0.00 |
| FBgn0035231 | Cct2     | CTP:phosphocholine cytidyltransferase 2    | -1.63 | 0.00 |
| FBgn0004643 | mit(1)15 | mitotic 15                                 | -1.63 | 0.00 |
| FBgn0024510 | dlt      | discs lost                                 | -1.63 | 0.00 |
| FBgn0039541 | CG12876  | CG12876                                    | -1.64 | 0.00 |
| FBgn0000592 | Est-6    | Esterase 6                                 | -1.64 | 0.00 |
| FBgn0031438 | Drp1     | Dynamamin related protein 1                | -1.64 | 0.00 |
| FBgn0034434 | Rgk1     | Rgk1                                       | -1.64 | 0.00 |
| FBgn0003074 | Pgi      | Phosphoglucose isomerase                   | -1.64 | 0.00 |
| FBgn0001219 | Hsc70-4  | Heat shock protein cognate 4               | -1.64 | 0.00 |
| FBgn0027529 | CG8920   | CG8920                                     | -1.64 | 0.00 |
| FBgn0039472 | CG17192  | CG17192                                    | -1.64 | 0.01 |
| FBgn0030718 | CG9172   | CG9172                                     | -1.64 | 0.00 |
| FBgn0033417 | Camta    | Calmodulin-binding transcription activator | -1.64 | 0.00 |
| FBgn0034406 | Jheh3    | Juvenile hormone epoxide hydrolase 3       | -1.64 | 0.00 |
| FBgn0036763 | CG7441   | CG7441                                     | -1.64 | 0.00 |
| FBgn0003996 | w        | white                                      | -1.64 | 0.00 |
| FBgn0039324 | CG10553  | CG10553                                    | -1.64 | 0.00 |
| FBgn0051752 | CG31752  | CG31752                                    | -1.64 | 0.00 |
| FBgn0011554 | etaTry   | etaTrypsin                                 | -1.64 | 0.00 |
| FBgn0037671 | CG8444   | CG8444                                     | -1.64 | 0.00 |
| FBgn0036211 | CG5946   | CG5946                                     | -1.64 | 0.00 |
| FBgn0015040 | Cyp9c1   | Cytochrome P450-9c1                        | -1.64 | 0.00 |

|             |               |                                                       |       |      |
|-------------|---------------|-------------------------------------------------------|-------|------|
| FBgn0005614 | trpl          | trp-like                                              | -1.64 | 0.00 |
| FBgn0027917 | CG33968       | CG33968                                               | -1.64 | 0.00 |
| FBgn0035409 | CG14963       | CG14963                                               | -1.64 | 0.00 |
| FBgn0004778 | Ccp84Af       | Ccp84Af                                               | -1.64 | 0.00 |
| FBgn0031807 | CG13981       | CG13981                                               | -1.64 | 0.00 |
| FBgn0034225 | CG4827        | CG4827                                                | -1.64 | 0.00 |
| FBgn0033033 | scarface      | scarface                                              | -1.65 | 0.00 |
| FBgn0034119 | l(2)k07824    | lethal (2) k07824                                     | -1.65 | 0.00 |
| FBgn0011700 | spn-A         | spindle A                                             | -1.65 | 0.00 |
| FBgn0016119 | ATPsyn-Cf6    | ATPase coupling factor 6                              | -1.65 | 0.00 |
| FBgn0034501 | CG13868       | CG13868                                               | -1.65 | 0.00 |
| FBgn0027600 | CG4778        | CG4778                                                | -1.65 | 0.00 |
| FBgn0032812 | CG10263       | CG10263                                               | -1.65 | 0.00 |
| FBgn0040722 | CG14349       | CG14349                                               | -1.65 | 0.00 |
| FBgn0039745 | CG7950        | CG7950                                                | -1.65 | 0.00 |
| FBgn0037354 | CG12171       | CG12171                                               | -1.65 | 0.00 |
| FBgn0022097 | Vha36         | Vha36                                                 | -1.65 | 0.00 |
| FBgn0029868 | CG3446        | CG3446                                                | -1.65 | 0.00 |
| FBgn0039182 | CG5728        | CG5728                                                | -1.65 | 0.00 |
| FBgn0027106 | inx7          | innexin 7                                             | -1.65 | 0.00 |
| FBgn0010043 | GstD7         | Glutathione S transferase D7                          | -1.65 | 0.00 |
| FBgn0035325 | CG13806       | CG13806                                               | -1.65 | 0.00 |
| FBgn0031806 | slam          | slow as molasses                                      | -1.65 | 0.00 |
| FBgn0024238 | Fim           | Fimbrin                                               | -1.65 | 0.00 |
| FBgn0037293 | CG12007       | CG12007                                               | -1.65 | 0.00 |
| FBgn0033714 | garz          | gartenzwerg                                           | -1.66 | 0.00 |
| FBgn0032715 | CG17597       | CG17597                                               | -1.66 | 0.00 |
| FBgn0036588 | CG13068       | CG13068                                               | -1.66 | 0.00 |
| FBgn0038139 | CG8795        | CG8795                                                | -1.66 | 0.00 |
| FBgn0039567 | betaTub97EF   | beta-Tubulin at 97EF                                  | -1.66 | 0.00 |
| FBgn0029761 | SK            | small conductance calcium-activated potassium channel | -1.66 | 0.00 |
| FBgn0023512 | eIF2B-epsilon | eIF2B-epsilon                                         | -1.66 | 0.00 |
| FBgn0010391 | Gtp-bp        | GTP-binding protein                                   | -1.66 | 0.00 |
| FBgn0039052 | CG6733        | CG6733                                                | -1.66 | 0.00 |
| FBgn0040319 | Gclc          | Glutamate-cysteine ligase catalytic subunit           | -1.66 | 0.00 |
| FBgn0032387 | CG16965       | CG16965                                               | -1.66 | 0.00 |

|             |          |                                            |       |      |
|-------------|----------|--------------------------------------------|-------|------|
| FBgn0031178 | CG10918  | CG10918                                    | -1.66 | 0.00 |
| FBgn0031832 | CG9596   | CG9596                                     | -1.66 | 0.00 |
| FBgn0029084 | gom      | gomdanji                                   | -1.66 | 0.00 |
| FBgn0027607 | CG8230   | CG8230                                     | -1.66 | 0.00 |
| FBgn0035438 | PHGPx    | PHGPx                                      | -1.66 | 0.00 |
| FBgn0039669 | CG2014   | CG2014                                     | -1.66 | 0.00 |
| FBgn0036594 | CG13047  | CG13047                                    | -1.66 | 0.00 |
| FBgn0019929 | Ser7     | Ser7                                       | -1.67 | 0.00 |
| FBgn0033375 | CG8078   | CG8078                                     | -1.67 | 0.00 |
| FBgn0040064 | yip2     | yippee interacting protein 2               | -1.67 | 0.00 |
| FBgn0036361 | CG10154  | CG10154                                    | -1.67 | 0.00 |
| FBgn0035495 | CG14989  | CG14989                                    | -1.67 | 0.00 |
| FBgn0022023 | eIF-3p40 | Eukaryotic initiation factor 3 p40 subunit | -1.67 | 0.00 |
| FBgn0035247 | metI     | methyltransferase-like                     | -1.67 | 0.00 |
| FBgn0037341 | CG12746  | CG12746                                    | -1.67 | 0.00 |
| FBgn0041707 | 7B2      | 7B2                                        | -1.67 | 0.00 |
| FBgn0031991 | CG8506   | CG8506                                     | -1.67 | 0.00 |
| FBgn0038949 | CG7071   | CG7071                                     | -1.67 | 0.00 |
| FBgn0031432 | Cyp309a1 | Cyp309a1                                   | -1.67 | 0.00 |
| FBgn0040895 | CG14773  | CG14773                                    | -1.67 | 0.00 |
| FBgn0038918 | CG6690   | CG6690                                     | -1.67 | 0.00 |
| FBgn0037165 | CG11437  | CG11437                                    | -1.67 | 0.00 |
| FBgn0033868 | CG13340  | CG13340                                    | -1.68 | 0.00 |
| FBgn0031818 | CG9536   | CG9536                                     | -1.68 | 0.00 |
| FBgn0053075 | Shawn    | Shawn                                      | -1.68 | 0.00 |
| FBgn0032315 | CG14069  | CG14069                                    | -1.68 | 0.00 |
| FBgn0035724 | CG10064  | CG10064                                    | -1.68 | 0.00 |
| FBgn0025836 | RhoGAP1A | RhoGAP1A                                   | -1.68 | 0.00 |
| FBgn0035039 | CG3608   | CG3608                                     | -1.68 | 0.00 |
| FBgn0030141 | Gga      | Gga                                        | -1.68 | 0.00 |
| FBgn0003328 | scb      | scab                                       | -1.68 | 0.00 |
| FBgn0033394 | CG13740  | CG13740                                    | -1.68 | 0.00 |
| FBgn0039882 | CG11576  | CG11576                                    | -1.68 | 0.00 |
| FBgn0051757 | CG31757  | CG31757                                    | -1.68 | 0.00 |
| FBgn0037704 | by       | blistry                                    | -1.68 | 0.00 |
| FBgn0002441 | l(3)mbt  | lethal (3) malignant brain tumor           | -1.68 | 0.00 |

|             |         |                                     |       |      |
|-------------|---------|-------------------------------------|-------|------|
| FBgn0004834 | Gprk2   | G protein-coupled receptor kinase 2 | -1.68 | 0.00 |
| FBgn0039203 | CG13618 | CG13618                             | -1.68 | 0.00 |
| FBgn0038924 | CG6028  | CG6028                              | -1.68 | 0.00 |
| FBgn0036638 | CG13033 | CG13033                             | -1.68 | 0.00 |
| FBgn0034482 | CG18416 | CG18416                             | -1.69 | 0.00 |
| FBgn0038742 | Arc42   | Arc42                               | -1.69 | 0.00 |
| FBgn0031392 | CG7263  | CG7263                              | -1.69 | 0.00 |
| FBgn0037488 | CG14607 | CG14607                             | -1.69 | 0.00 |
| FBgn0030263 | CG2076  | CG2076                              | -1.69 | 0.00 |
| FBgn0037501 | CG10101 | CG10101                             | -1.69 | 0.00 |
| FBgn0029502 | COQ7    | COQ7                                | -1.69 | 0.00 |
| FBgn0036774 | mRpS26  | mitochondrial ribosomal protein S26 | -1.69 | 0.00 |
| FBgn0039656 | CG11951 | CG11951                             | -1.69 | 0.00 |
| FBgn0038734 | CG11453 | CG11453                             | -1.69 | 0.00 |
| FBgn0035243 | CG13926 | CG13926                             | -1.69 | 0.00 |
| FBgn0032049 | CG13095 | CG13095                             | -1.69 | 0.00 |
| FBgn0033366 | Ance-4  | Ance-4                              | -1.69 | 0.00 |
| FBgn0008636 | hbn     | homeobrain                          | -1.69 | 0.00 |
| FBgn0037261 | CG9775  | CG9775                              | -1.69 | 0.00 |
| FBgn0051792 | CG31792 | CG31792                             | -1.69 | 0.00 |
| FBgn0031428 | CG9886  | CG9886                              | -1.69 | 0.00 |
| FBgn0030403 | CG1824  | CG1824                              | -1.70 | 0.00 |
| FBgn0024558 | Dph5    | Diphthamide methyltransferase       | -1.70 | 0.00 |
| FBgn0004777 | Ccp84Ag | Ccp84Ag                             | -1.70 | 0.00 |
| FBgn0033543 | CG12338 | CG12338                             | -1.70 | 0.00 |
| FBgn0031011 | CG8034  | CG8034                              | -1.70 | 0.00 |
| FBgn0035190 | CG13913 | CG13913                             | -1.70 | 0.00 |
| FBgn0035548 | CG15023 | CG15023                             | -1.70 | 0.00 |
| FBgn0032908 | CG9270  | CG9270                              | -1.70 | 0.00 |
| FBgn0032810 | CG13077 | CG13077                             | -1.70 | 0.00 |
| FBgn0033866 | CG6280  | CG6280                              | -1.70 | 0.00 |
| FBgn0034289 | CG10910 | CG10910                             | -1.70 | 0.00 |
| FBgn0014024 | Rnp4F   | RNA-binding protein 4F              | -1.70 | 0.00 |
| FBgn0013307 | Odc1    | Ornithine decarboxylase 1           | -1.70 | 0.00 |
| FBgn0037140 | CG7442  | CG7442                              | -1.70 | 0.00 |
| FBgn0035189 | CG9119  | CG9119                              | -1.70 | 0.00 |



|             |           |                                                           |       |      |
|-------------|-----------|-----------------------------------------------------------|-------|------|
| FBgn0052918 | CG15891   | CG15891                                                   | -1.71 | 0.00 |
| FBgn0040394 | CG16903   | CG16903                                                   | -1.71 | 0.00 |
| FBgn0028480 | CG17841   | CG17841                                                   | -1.71 | 0.00 |
| FBgn0034957 | CG3121    | CG3121                                                    | -1.71 | 0.00 |
| FBgn0034851 | CG11079   | CG11079                                                   | -1.71 | 0.00 |
| FBgn0014127 | barr      | barren                                                    | -1.71 | 0.00 |
| FBgn0036144 | GlcAT-P   | GlcAT-P                                                   | -1.71 | 0.00 |
| FBgn0033308 | CG8736    | CG8736                                                    | -1.71 | 0.00 |
| FBgn0052604 | l(1)G0007 | lethal (1) G0007                                          | -1.71 | 0.00 |
| FBgn0033083 | Dpit47    | DNA polymerase interacting tpr containing protein of 47kD | -1.71 | 0.00 |
| FBgn0037684 | CG8129    | CG8129                                                    | -1.71 | 0.00 |
| FBgn0011555 | thetaTry  | thetaTrypsin                                              | -1.71 | 0.00 |
| FBgn0036157 | CG7560    | CG7560                                                    | -1.72 | 0.00 |
| FBgn0050291 | CG30291   | CG30291                                                   | -1.72 | 0.00 |
| FBgn0031478 | CG8814    | CG8814                                                    | -1.72 | 0.00 |
| FBgn0003060 | CG9757    | CG9757                                                    | -1.72 | 0.00 |
| FBgn0051006 | CG31006   | CG31006                                                   | -1.72 | 0.00 |
| FBgn0051674 | CG31674   | CG31674                                                   | -1.72 | 0.00 |
| FBgn0037399 | Or83c     | Odorant receptor 83c                                      | -1.72 | 0.00 |
| FBgn0013432 | bcn92     | bcn92                                                     | -1.72 | 0.00 |
| FBgn0033645 | CG13196   | CG13196                                                   | -1.72 | 0.00 |
| FBgn0014002 | Pdi       | Protein disulfide isomerase                               | -1.72 | 0.00 |
| FBgn0028950 | CG15255   | CG15255                                                   | -1.72 | 0.00 |
| FBgn0033351 | CG8235    | CG8235                                                    | -1.72 | 0.00 |
| FBgn0034298 | CG14497   | CG14497                                                   | -1.72 | 0.00 |
| FBgn0031817 | CG9531    | CG9531                                                    | -1.72 | 0.00 |
| FBgn0039555 | mRpS22    | mitochondrial ribosomal protein S22                       | -1.73 | 0.00 |
| FBgn0032983 | CG5922    | CG5922                                                    | -1.73 | 0.00 |
| FBgn0032075 | Tsp29Fb   | Tetraspanin 29Fb                                          | -1.73 | 0.00 |
| FBgn0015277 | Pi3K59F   | Phosphatidylinositol 3 kinase 59F                         | -1.73 | 0.00 |
| FBgn0027556 | CG4928    | CG4928                                                    | -1.73 | 0.00 |
| FBgn0037329 | CG12162   | CG12162                                                   | -1.73 | 0.00 |
| FBgn0035666 | Jon65Aii  | Jonah 65Aii                                               | -1.73 | 0.00 |
| FBgn0040691 | CG13915   | CG13915                                                   | -1.73 | 0.00 |
| FBgn0035950 | CG5288    | CG5288                                                    | -1.73 | 0.00 |
| FBgn0002930 | nec       | necrotic                                                  | -1.73 | 0.00 |

|             |            |                                      |       |      |
|-------------|------------|--------------------------------------|-------|------|
| FBgn0039871 | l(3)s1921  | lethal (3) s1921                     | -1.73 | 0.00 |
| FBgn0030981 | CG14191    | CG14191                              | -1.73 | 0.00 |
| FBgn0016075 | vkg        | viking                               | -1.73 | 0.00 |
| FBgn0004507 | GlyP       | Glycogen phosphorylase               | -1.73 | 0.00 |
| FBgn0039140 | Miro       | Mitochondrial Rho                    | -1.73 | 0.00 |
| FBgn0037078 | CG12971    | CG12971                              | -1.73 | 0.00 |
| FBgn0004867 | sop        | string of pearls                     | -1.73 | 0.00 |
| FBgn0051004 | CG31004    | CG31004                              | -1.73 | 0.00 |
| FBgn0039817 | CG15553    | CG15553                              | -1.73 | 0.00 |
| FBgn0031000 | CG7876     | CG7876                               | -1.73 | 0.00 |
| FBgn0028497 | CG3530     | CG3530                               | -1.73 | 0.00 |
| FBgn0052392 | CG32392    | CG32392                              | -1.73 | 0.00 |
| FBgn0037822 | CG14683    | CG14683                              | -1.73 | 0.00 |
| FBgn0015316 | Try29F     | Trypsin 29F                          | -1.74 | 0.00 |
| FBgn0033206 | CG12042    | CG12042                              | -1.74 | 0.00 |
| FBgn0010053 | Jheh1      | Juvenile hormone epoxide hydrolase 1 | -1.74 | 0.00 |
| FBgn0015570 | alpha-Est2 | alpha-Esterase-2                     | -1.74 | 0.00 |
| FBgn0034723 | CG13506    | CG13506                              | -1.74 | 0.00 |
| FBgn0029896 | CG3168     | CG3168                               | -1.74 | 0.00 |
| FBgn0014863 | Mlp84B     | Muscle LIM protein at 84B            | -1.74 | 0.00 |
| FBgn0032397 | Tom70      | Translocase of outer membrane 70     | -1.74 | 0.00 |
| FBgn0027580 | CG1516     | CG1516                               | -1.74 | 0.00 |
| FBgn0040797 | CG13066    | CG13066                              | -1.74 | 0.00 |
| FBgn0031092 | CG9577     | CG9577                               | -1.74 | 0.00 |
| FBgn0034565 | CG15650    | CG15650                              | -1.74 | 0.00 |
| FBgn0046281 | CG33340    | CG33340                              | -1.74 | 0.00 |
| FBgn0036824 | CG3902     | CG3902                               | -1.74 | 0.00 |
| FBgn0032266 | CG18302    | CG18302                              | -1.75 | 0.00 |
| FBgn0036162 | CG6140     | CG6140                               | -1.75 | 0.00 |
| FBgn0035388 | CG2162     | CG2162                               | -1.75 | 0.00 |
| FBgn0039828 | CG1542     | CG1542                               | -1.75 | 0.00 |
| FBgn0034840 | CG3124     | CG3124                               | -1.75 | 0.00 |
| FBgn0052793 | CG32793    | CG32793                              | -1.75 | 0.00 |
| FBgn0030737 | CG9914     | CG9914                               | -1.75 | 0.00 |
| FBgn0052549 | CG32549    | CG32549                              | -1.75 | 0.00 |
| FBgn0027615 | CG6404     | CG6404                               | -1.75 | 0.00 |

|             |          |                           |       |      |
|-------------|----------|---------------------------|-------|------|
| FBgn0025593 | Glut1    | Glucose transporter 1     | -1.75 | 0.00 |
| FBgn0031728 | CG7235   | CG7235                    | -1.75 | 0.00 |
| FBgn0035077 | CG9083   | CG9083                    | -1.75 | 0.00 |
| FBgn0032512 | CG9305   | CG9305                    | -1.75 | 0.00 |
| FBgn0023516 | CG14815  | CG14815                   | -1.75 | 0.00 |
| FBgn0025682 | scf      | supercoiling factor       | -1.75 | 0.00 |
| FBgn0025839 | CG3621   | CG3621                    | -1.76 | 0.00 |
| FBgn0036362 | CG10725  | CG10725                   | -1.76 | 0.00 |
| FBgn0051477 | CG31477  | CG31477                   | -1.76 | 0.00 |
| FBgn0034215 | CG4802   | CG4802                    | -1.76 | 0.00 |
| FBgn0002021 | l(2)37Bb | lethal (2) 37Bb           | -1.76 | 0.00 |
| FBgn0034297 | CG14496  | CG14496                   | -1.76 | 0.00 |
| FBgn0033158 | CG12164  | CG12164                   | -1.76 | 0.00 |
| FBgn0052316 | CG33791  | CG33791                   | -1.76 | 0.00 |
| FBgn0033292 | Cyp4ad1  | Cyp4ad1                   | -1.76 | 0.00 |
| FBgn0026729 | axo      | axotactin                 | -1.76 | 0.00 |
| FBgn0036607 | CG13059  | CG13059                   | -1.77 | 0.00 |
| FBgn0028737 | Ef1beta  | Elongation factor 1 beta  | -1.77 | 0.00 |
| FBgn0034075 | Asph     | Aspartyl beta-hydroxylase | -1.77 | 0.00 |
| FBgn0034134 | CG4750   | CG4750                    | -1.77 | 0.00 |
| FBgn0027588 | CG14476  | CG14476                   | -1.77 | 0.00 |
| FBgn0037270 | CG9769   | CG9769                    | -1.77 | 0.00 |
| FBgn0033401 | CG1968   | CG1968                    | -1.77 | 0.00 |
| FBgn0037018 | CG4042   | CG4042                    | -1.77 | 0.00 |
| FBgn0003691 | th       | thread                    | -1.77 | 0.00 |
| FBgn0036351 | CG14107  | CG14107                   | -1.77 | 0.00 |
| FBgn0040625 | CG18682  | CG18682                   | -1.77 | 0.00 |
| FBgn0031860 | CG11236  | CG11236                   | -1.77 | 0.00 |
| FBgn0036871 | CG14096  | CG14096                   | -1.77 | 0.00 |
| FBgn0033673 | CG8298   | CG8298                    | -1.78 | 0.00 |
| FBgn0039118 | CG10208  | CG10208                   | -1.78 | 0.00 |
| FBgn0034940 | CG16787  | CG16787                   | -1.78 | 0.00 |
| FBgn0052445 | CG32445  | CG32445                   | -1.78 | 0.00 |
| FBgn0001142 | Gs1      | Glutamine synthetase 1    | -1.78 | 0.00 |
| FBgn0003057 | CG10598  | CG10598                   | -1.78 | 0.00 |
| FBgn0028916 | CG33090  | CG33090                   | -1.78 | 0.00 |

|             |            |                                     |       |      |
|-------------|------------|-------------------------------------|-------|------|
| FBgn0031537 | sec5       | sec5                                | -1.78 | 0.00 |
| FBgn0024973 | CG2701     | CG2701                              | -1.78 | 0.00 |
| FBgn0037065 | CG12974    | CG12974                             | -1.78 | 0.00 |
| FBgn0021979 | l(2)k09913 | lethal (2) k09913                   | -1.78 | 0.00 |
| FBgn0011455 | l(3)neo18  | lethal (3) neo18                    | -1.78 | 0.00 |
| FBgn0031942 | CG7203     | CG7203                              | -1.78 | 0.00 |
| FBgn0035203 | CG9149     | CG9149                              | -1.78 | 0.00 |
| FBgn0037973 | CG18547    | CG18547                             | -1.78 | 0.00 |
| FBgn0033601 | CG9076     | CG9076                              | -1.78 | 0.00 |
| FBgn0038482 | CG4053     | CG4053                              | -1.79 | 0.00 |
| FBgn0003076 | Pgm        | Phosphogluconate mutase             | -1.79 | 0.00 |
| FBgn0031312 | l(2)k00619 | lethal (2) k00619                   | -1.79 | 0.00 |
| FBgn0025383 | CG14780    | CG14780                             | -1.79 | 0.00 |
| FBgn0037566 | mRpL1      | mitochondrial ribosomal protein L1  | -1.79 | 0.00 |
| FBgn0028543 | CG31839    | CG31839                             | -1.79 | 0.00 |
| FBgn0016693 | Past1      | Putative Achaete Scute Target 1     | -1.79 | 0.00 |
| FBgn0002174 | l(2)tid    | lethal (2) tumorous imaginal discs  | -1.79 | 0.00 |
| FBgn0037653 | CG11982    | CG11982                             | -1.79 | 0.00 |
| FBgn0037846 | CG6574     | CG6574                              | -1.79 | 0.00 |
| FBgn0028436 | ECSIT      | ECSIT                               | -1.79 | 0.00 |
| FBgn0029804 | CG3097     | CG3097                              | -1.80 | 0.00 |
| FBgn0031305 | Iris       | Iris                                | -1.80 | 0.00 |
| FBgn0039219 | CG13630    | CG13630                             | -1.80 | 0.00 |
| FBgn0034147 | CG5197     | CG5197                              | -1.80 | 0.00 |
| FBgn0033188 | CG1600     | CG1600                              | -1.80 | 0.00 |
| FBgn0001230 | Hsp68      | Heat shock protein 68               | -1.80 | 0.02 |
| FBgn0038318 | CG6236     | CG6236                              | -1.80 | 0.00 |
| FBgn0011787 | mRpL12     | mitochondrial ribosomal protein L12 | -1.81 | 0.00 |
| FBgn0028492 | Aats-asn   | Asparaginyl-tRNA synthetase         | -1.81 | 0.00 |
| FBgn0052736 | CG32736    | CG32736                             | -1.81 | 0.00 |
| FBgn0030821 | CG5010     | CG5010                              | -1.81 | 0.00 |
| FBgn0004878 | cas        | castor                              | -1.81 | 0.00 |
| FBgn0015031 | cype       | cyclope                             | -1.81 | 0.00 |
| FBgn0027081 | Aats-thr   | Threonyl-tRNA synthetase            | -1.81 | 0.00 |
| FBgn0034425 | CG11906    | CG11906                             | -1.81 | 0.00 |
| FBgn0003366 | sev        | sevenless                           | -1.81 | 0.00 |

|             |            |                                   |       |      |
|-------------|------------|-----------------------------------|-------|------|
| FBgn0031500 | CG17221    | CG17221                           | -1.81 | 0.00 |
| FBgn0011603 | ine        | inebriated                        | -1.81 | 0.00 |
| FBgn0033637 | l(2)k14708 | lethal (2) k14708                 | -1.82 | 0.00 |
| FBgn0037678 | CG16749    | CG16749                           | -1.82 | 0.00 |
| FBgn0025725 | alphaCop   | alpha-coatomer protein            | -1.82 | 0.00 |
| FBgn0024897 | b6         | b6                                | -1.82 | 0.00 |
| FBgn0029891 | CG4523     | CG4523                            | -1.82 | 0.00 |
| FBgn0036532 | CG13445    | CG13445                           | -1.82 | 0.00 |
| FBgn0002031 | l(2)37Cc   | lethal (2) 37Cc                   | -1.82 | 0.00 |
| FBgn0011834 | Ser6       | Serine protease 6                 | -1.82 | 0.00 |
| FBgn0052533 | CG32533    | CG32533                           | -1.82 | 0.00 |
| FBgn0034204 | CG10953    | CG10953                           | -1.82 | 0.01 |
| FBgn0030908 | CG15057    | CG15057                           | -1.82 | 0.00 |
| FBgn0014023 | Rlc1       | Rlc1                              | -1.82 | 0.00 |
| FBgn0037144 | CG7458     | CG7458                            | -1.82 | 0.00 |
| FBgn0028495 | CG18616    | CG18616                           | -1.82 | 0.00 |
| FBgn0034971 | CG3209     | CG3209                            | -1.83 | 0.00 |
| FBgn0033397 | Cyp4p3     | Cyp4p3                            | -1.83 | 0.00 |
| FBgn0036872 | CG12519    | CG12519                           | -1.83 | 0.00 |
| FBgn0031303 | smi21F     | smell impaired 21F                | -1.83 | 0.00 |
| FBgn0035931 | CG13312    | CG13312                           | -1.83 | 0.00 |
| FBgn0027785 | NP15.6     | NP15.6                            | -1.83 | 0.00 |
| FBgn0034494 | CG10444    | CG10444                           | -1.83 | 0.00 |
| FBgn0029888 | CG3192     | CG3192                            | -1.83 | 0.00 |
| FBgn0035947 | CG5064     | CG5064                            | -1.83 | 0.00 |
| FBgn0038049 | CG5844     | CG5844                            | -1.84 | 0.00 |
| FBgn0033524 | Cyp49a1    | Cyp49a1                           | -1.84 | 0.00 |
| FBgn0038481 | CG17475    | CG17475                           | -1.84 | 0.00 |
| FBgn0029176 | Ef1gamma   | Ef1gamma                          | -1.84 | 0.00 |
| FBgn0030824 | CG5070     | CG5070                            | -1.84 | 0.00 |
| FBgn0033428 | Updo       | Updo                              | -1.84 | 0.00 |
| FBgn0032136 | CG15828    | CG15828                           | -1.84 | 0.00 |
| FBgn0030934 | Aats-his   | Histidyl-tRNA synthetase          | -1.84 | 0.00 |
| FBgn0039561 | CG4963     | CG4963                            | -1.84 | 0.00 |
| FBgn0026761 | Trap1      | Trap1                             | -1.84 | 0.00 |
| FBgn0003067 | Pepck      | Phosphoenolpyruvate carboxykinase | -1.84 | 0.00 |

|             |            |                                         |       |      |
|-------------|------------|-----------------------------------------|-------|------|
| FBgn0031021 | CG12203    | CG12203                                 | -1.84 | 0.00 |
| FBgn0028573 | prc        | pericardin                              | -1.84 | 0.00 |
| FBgn0037420 | CG15597    | CG15597                                 | -1.85 | 0.00 |
| FBgn0036182 | CG6084     | CG6084                                  | -1.85 | 0.00 |
| FBgn0034351 | CG5190     | CG5190                                  | -1.85 | 0.00 |
| FBgn0026372 | RpL23A     | Ribosomal protein L23A                  | -1.85 | 0.00 |
| FBgn0034201 | CG17290    | CG17290                                 | -1.85 | 0.00 |
| FBgn0034343 | GstE9      | Glutathione S transferase E9            | -1.85 | 0.00 |
| FBgn0003075 | Pgk        | Phosphoglycerate kinase                 | -1.85 | 0.00 |
| FBgn0028962 | Aats-ala-m | mitochondrial alanyl-tRNA synthetase    | -1.85 | 0.00 |
| FBgn0010504 | l(2)02045  | lethal (2) 02045                        | -1.85 | 0.00 |
| FBgn0003159 | ptr        | proximal to raf                         | -1.86 | 0.00 |
| FBgn0033391 | CG8026     | CG8026                                  | -1.86 | 0.00 |
| FBgn0003178 | PyK        | Pyruvate kinase                         | -1.86 | 0.00 |
| FBgn0051086 | CG31086    | CG31086                                 | -1.86 | 0.00 |
| FBgn0000630 | f          | forked                                  | -1.86 | 0.00 |
| FBgn0037762 | CG16905    | CG16905                                 | -1.86 | 0.00 |
| FBgn0035792 | CG7548     | CG7548                                  | -1.86 | 0.00 |
| FBgn0033751 | CG8818     | CG8818                                  | -1.86 | 0.00 |
| FBgn0031810 | CG9511     | CG9511                                  | -1.87 | 0.00 |
| FBgn0039674 | CG1907     | CG1907                                  | -1.87 | 0.00 |
| FBgn0025595 | GRHR       | Gonadotropin-releasing hormone receptor | -1.87 | 0.00 |
| FBgn0030837 | CG8661     | CG8661                                  | -1.87 | 0.00 |
| FBgn0029762 | CG3252     | CG3252                                  | -1.87 | 0.00 |
| FBgn0038552 | CG18012    | CG18012                                 | -1.87 | 0.00 |
| FBgn0050272 | CG30272    | CG30272                                 | -1.87 | 0.00 |
| FBgn0052354 | CG32354    | CG32354                                 | -1.87 | 0.00 |
| FBgn0035431 | CG14968    | CG14968                                 | -1.87 | 0.00 |
| FBgn0029811 | CG4052     | CG4052                                  | -1.87 | 0.00 |
| FBgn0035787 | CG8543     | CG8543                                  | -1.87 | 0.00 |
| FBgn0003515 | st         | scarlet                                 | -1.88 | 0.00 |
| FBgn0030510 | CG12177    | CG12177                                 | -1.88 | 0.00 |
| FBgn0029897 | RpL17      | Ribosomal protein L17                   | -1.88 | 0.00 |
| FBgn0014906 | CG3488     | CG3488                                  | -1.88 | 0.00 |
| FBgn0039428 | CG14237    | CG14237                                 | -1.88 | 0.00 |
| FBgn0051052 | CG31052    | CG31052                                 | -1.88 | 0.00 |

|             |            |                                                      |       |      |
|-------------|------------|------------------------------------------------------|-------|------|
| FBgn0001248 | Idh        | Isocitrate dehydrogenase                             | -1.88 | 0.00 |
| FBgn0034784 | CG9826     | CG9826                                               | -1.88 | 0.00 |
| FBgn0035886 | Jon66Ci    | Jonah 66Ci                                           | -1.88 | 0.00 |
| FBgn0032985 | Mgstl-Psi  | Microsomal glutathione S-transferase-like pseudogene | -1.88 | 0.00 |
| FBgn0011577 | dally      | division abnormally delayed                          | -1.88 | 0.00 |
| FBgn0000326 | clt        | cricket                                              | -1.89 | 0.00 |
| FBgn0037371 | CG2097     | CG2097                                               | -1.89 | 0.00 |
| FBgn0033502 | CG12910    | CG12910                                              | -1.89 | 0.00 |
| FBgn0001565 | Hlc        | Helicase                                             | -1.89 | 0.00 |
| FBgn0035632 | CG10575    | CG10575                                              | -1.89 | 0.00 |
| FBgn0022359 | Sodh-2     | Sorbitol dehydrogenase-2                             | -1.89 | 0.00 |
| FBgn0033093 | CG3270     | CG3270                                               | -1.89 | 0.00 |
| FBgn0038224 | CG3321     | CG3321                                               | -1.89 | 0.00 |
| FBgn0038516 | CG5840     | CG5840                                               | -1.89 | 0.00 |
| FBgn0030872 | Ucp4A      | Ucp4A                                                | -1.89 | 0.00 |
| FBgn0032393 | CG12264    | CG12264                                              | -1.89 | 0.00 |
| FBgn0036630 | Aats-tyr   | Tyrosyl-tRNA synthetase                              | -1.89 | 0.00 |
| FBgn0051090 | CG31090    | CG31090                                              | -1.89 | 0.00 |
| FBgn0051029 | CG31029    | CG31029                                              | -1.89 | 0.00 |
| FBgn0025790 | TBPH       | TBPH                                                 | -1.89 | 0.00 |
| FBgn0028970 | betaggt-II | beta subunit of type II geranylgeranyl transferase   | -1.90 | 0.00 |
| FBgn0033913 | CG8468     | CG8468                                               | -1.90 | 0.00 |
| FBgn0034334 | GstE10     | Glutathione S transferase E10                        | -1.90 | 0.00 |
| FBgn0010548 | Aldh-III   | Aldehyde dehydrogenase type III                      | -1.90 | 0.00 |
| FBgn0035225 | cue        | cueball                                              | -1.90 | 0.00 |
| FBgn0033812 | CG4663     | CG4663                                               | -1.90 | 0.00 |
| FBgn0036702 | CG6512     | CG6512                                               | -1.90 | 0.00 |
| FBgn0036947 | CG7306     | CG7306                                               | -1.90 | 0.00 |
| FBgn0034885 | CG4019     | CG4019                                               | -1.90 | 0.00 |
| FBgn0037643 | CG11963    | CG11963                                              | -1.90 | 0.00 |
| FBgn0035586 | CG10671    | CG10671                                              | -1.90 | 0.00 |
| FBgn0035043 | CG4781     | CG4781                                               | -1.91 | 0.00 |
| FBgn0052541 | CG32541    | CG32541                                              | -1.91 | 0.00 |
| FBgn0032268 | CG6138     | CG6138                                               | -1.91 | 0.00 |
| FBgn0029591 | CG14799    | CG14799                                              | -1.91 | 0.00 |
| FBgn0036737 | Jon74E     | Jonah 74E                                            | -1.91 | 0.00 |

|             |           |                            |       |      |
|-------------|-----------|----------------------------|-------|------|
| FBgn0011638 | La        | La autoantigen-like        | -1.92 | 0.00 |
| FBgn0030615 | Cyp4s3    | Cyp4s3                     | -1.92 | 0.00 |
| FBgn0031068 | CG12534   | CG12534                    | -1.92 | 0.00 |
| FBgn0037763 | CG16904   | CG16904                    | -1.92 | 0.00 |
| FBgn0038046 | CG5641    | CG5641                     | -1.92 | 0.00 |
| FBgn0037129 | CG14565   | CG14565                    | -1.92 | 0.00 |
| FBgn0010651 | l(2)08717 | lethal (2) 08717           | -1.92 | 0.00 |
| FBgn0052656 | CG32656   | CG32656                    | -1.92 | 0.00 |
| FBgn0030746 | CG9981    | CG9981                     | -1.92 | 0.00 |
| FBgn0035298 | CG1140    | CG1140                     | -1.92 | 0.00 |
| FBgn0050502 | CG30502   | CG30502                    | -1.92 | 0.00 |
| FBgn0051721 | Trim9     | Trim9                      | -1.92 | 0.00 |
| FBgn0003738 | Tpi       | Triose phosphate isomerase | -1.92 | 0.00 |
| FBgn0033189 | Cyt-b5    | Cyt-b5                     | -1.92 | 0.00 |
| FBgn0038981 | CG5346    | CG5346                     | -1.93 | 0.00 |
| FBgn0039719 | CG15515   | CG15515                    | -1.93 | 0.00 |
| FBgn0003748 | Treh      | Trehalase                  | -1.93 | 0.00 |
| FBgn0043471 | kappaTry  | kappaTry                   | -1.93 | 0.00 |
| FBgn0016013 | Faa       | Fumarylacetoacetase        | -1.93 | 0.00 |
| FBgn0037750 | CG12946   | CG12946                    | -1.93 | 0.00 |
| FBgn0011270 | Pglym87   | Pglym87                    | -1.93 | 0.00 |
| FBgn0013949 | Ela       | Elastin-like               | -1.93 | 0.00 |
| FBgn0004551 | Ca-P60A   | Calcium ATPase at 60A      | -1.93 | 0.00 |
| FBgn0050159 | CG30159   | CG30159                    | -1.93 | 0.00 |
| FBgn0015816 | Slh       | SLY-1 homologous           | -1.93 | 0.00 |
| FBgn0033717 | CG8839    | CG8839                     | -1.94 | 0.00 |
| FBgn0033271 | CG8708    | CG8708                     | -1.94 | 0.00 |
| FBgn0036857 | CG9629    | CG9629                     | -1.94 | 0.00 |
| FBgn0033918 | CG8531    | CG8531                     | -1.94 | 0.00 |
| FBgn0010551 | l(2)03709 | lethal (2) 03709           | -1.94 | 0.00 |
| FBgn0020545 | kraken    | kraken                     | -1.94 | 0.00 |
| FBgn0031713 | CG7277    | CG7277                     | -1.94 | 0.00 |
| FBgn0028670 | Vha100-2  | Vha100-2                   | -1.94 | 0.00 |
| FBgn0021765 | scu       | scully                     | -1.94 | 0.00 |
| FBgn0037769 | CG12419   | CG12419                    | -1.94 | 0.00 |
| FBgn0033269 | CG8709    | CG8709                     | -1.94 | 0.00 |



|             |           |                                                   |       |      |
|-------------|-----------|---------------------------------------------------|-------|------|
| FBgn0032340 | CG6181    | CG6181                                            | -1.95 | 0.00 |
| FBgn0028479 | CG4389    | CG4389                                            | -1.95 | 0.00 |
| FBgn0032889 | CG9331    | CG9331                                            | -1.95 | 0.00 |
| FBgn0041789 | Pax       | Paxillin                                          | -1.95 | 0.00 |
| FBgn0032384 | CG14944   | CG14944                                           | -1.95 | 0.00 |
| FBgn0037880 | CG17726   | CG17726                                           | -1.95 | 0.00 |
| FBgn0051265 | CG31265   | CG31265                                           | -1.95 | 0.00 |
| FBgn0039436 | CG6478    | CG6478                                            | -1.96 | 0.00 |
| FBgn0031024 | l(1)G0156 | lethal (1) G0156                                  | -1.96 | 0.00 |
| FBgn0030481 | CG1662    | CG1662                                            | -1.96 | 0.00 |
| FBgn0030442 | CG15720   | CG15720                                           | -1.96 | 0.00 |
| FBgn0016684 | NaPi-T    | Na[+]-dependent inorganic phosphate cotransporter | -1.96 | 0.00 |
| FBgn0040279 | Osi14     | Osiris 14                                         | -1.96 | 0.00 |
| FBgn0028968 | gammaCop  | gamma-coatomer protein                            | -1.96 | 0.00 |
| FBgn0034642 | CG15674   | CG15674                                           | -1.96 | 0.00 |
| FBgn0035241 | CG12105   | CG12105                                           | -1.96 | 0.00 |
| FBgn0030575 | CG5321    | CG5321                                            | -1.97 | 0.00 |
| FBgn0032881 | CG9319    | CG9319                                            | -1.97 | 0.00 |
| FBgn0028662 | VhaPPA1-1 | VhaPPA1-1                                         | -1.97 | 0.00 |
| FBgn0037225 | CG14643   | CG14643                                           | -1.97 | 0.00 |
| FBgn0031889 | Pvf3      | PDGF- and VEGF-related factor 3                   | -1.97 | 0.00 |
| FBgn0031653 | Jon25Biii | Jonah 25Biii                                      | -1.97 | 0.00 |
| FBgn0010497 | l(2)01810 | lethal (2) 01810                                  | -1.97 | 0.00 |
| FBgn0033949 | CG10131   | CG10131                                           | -1.98 | 0.00 |
| FBgn0051954 | CG31954   | CG31954                                           | -1.98 | 0.00 |
| FBgn0040256 | Ugt86Dd   | Ugt86Dd                                           | -1.98 | 0.00 |
| FBgn0033735 | CG8525    | CG8525                                            | -1.98 | 0.00 |
| FBgn0027792 | l(1)G0431 | lethal (1) G0431                                  | -1.98 | 0.00 |
| FBgn0051975 | CG31975   | CG31975                                           | -1.98 | 0.00 |
| FBgn0015834 | Trip1     | Trip1                                             | -1.98 | 0.00 |
| FBgn0039441 | CG5476    | CG5476                                            | -1.98 | 0.00 |
| FBgn0015010 | Ag5r      | Antigen 5-related                                 | -1.98 | 0.00 |
| FBgn0032379 | Pde1c     | Phosphodiesterase 1c                              | -1.98 | 0.00 |
| FBgn0003071 | Pfk       | Phosphofructokinase                               | -1.98 | 0.00 |
| FBgn0030777 | CG9672    | CG9672                                            | -1.98 | 0.00 |
| FBgn0032464 | CG5075    | CG5075                                            | -1.98 | 0.00 |

|             |           |                                            |       |      |
|-------------|-----------|--------------------------------------------|-------|------|
| FBgn0020906 | Jon25Bi   | Jonah 25Bi                                 | -1.98 | 0.00 |
| FBgn0037166 | CG11426   | CG11426                                    | -1.98 | 0.00 |
| FBgn0033448 | CG1623    | CG1623                                     | -1.98 | 0.00 |
| FBgn0033464 | CG1441    | CG1441                                     | -1.99 | 0.00 |
| FBgn0024978 | CG2713    | CG2713                                     | -1.99 | 0.00 |
| FBgn0032382 | CG14935   | CG14935                                    | -1.99 | 0.00 |
| FBgn0033690 | CG8862    | CG8862                                     | -1.99 | 0.00 |
| FBgn0000299 | Cg25C     | Collagen type IV                           | -1.99 | 0.00 |
| FBgn0001091 | Gapdh1    | Glyceraldehyde 3 phosphate dehydrogenase 1 | -1.99 | 0.00 |
| FBgn0015247 | lap2      | Inhibitor of apoptosis 2                   | -2.00 | 0.00 |
| FBgn0034645 | CG10320   | CG10320                                    | -2.00 | 0.00 |
| FBgn0038347 | CG18522   | CG18522                                    | -2.00 | 0.00 |
| FBgn0004922 | RpS6      | Ribosomal protein S6                       | -2.00 | 0.00 |
| FBgn0005670 | Cyp4d1    | Cytochrome P450-4d1                        | -2.00 | 0.00 |
| FBgn0002570 | LvpH      | Larval visceral protein H                  | -2.00 | 0.00 |
| FBgn0032271 | CG7329    | CG7329                                     | -2.00 | 0.00 |
| FBgn0036226 | CG7252    | CG7252                                     | -2.00 | 0.00 |
| FBgn0035858 | CG13674   | CG13674                                    | -2.01 | 0.00 |
| FBgn0040507 | ACXD      | ACXD                                       | -2.01 | 0.00 |
| FBgn0035664 | Jon65Aiv  | Jonah 65Aiv                                | -2.01 | 0.00 |
| FBgn0037356 | CG12170   | CG12170                                    | -2.01 | 0.00 |
| FBgn0024361 | Tsp2A     | Tetraspanin 2A                             | -2.01 | 0.00 |
| FBgn0035311 | CR15821   | CR15821                                    | -2.01 | 0.00 |
| FBgn0000487 | Dox-A3    | Diphenol oxidase A3                        | -2.01 | 0.00 |
| FBgn0053071 | CG33713   | CG33713                                    | -2.01 | 0.00 |
| FBgn0035588 | CG10672   | CG10672                                    | -2.02 | 0.00 |
| FBgn0030990 | CG7556    | CG7556                                     | -2.02 | 0.00 |
| FBgn0035484 | CG11594   | CG11594                                    | -2.02 | 0.00 |
| FBgn0003162 | Pu        | Punch                                      | -2.02 | 0.05 |
| FBgn0038938 | CG7084    | CG7084                                     | -2.02 | 0.00 |
| FBgn0039223 | CG5805    | CG5805                                     | -2.02 | 0.00 |
| FBgn0010549 | l(2)03659 | lethal (2) 03659                           | -2.02 | 0.00 |
| FBgn0031093 | CG9581    | CG9581                                     | -2.02 | 0.00 |
| FBgn0023540 | CG3630    | CG3630                                     | -2.02 | 0.00 |
| FBgn0037936 | CG6908    | CG6908                                     | -2.02 | 0.00 |
| FBgn0029721 | l(1)G0334 | lethal (1) G0334                           | -2.02 | 0.00 |

|             |             |                                                  |       |      |
|-------------|-------------|--------------------------------------------------|-------|------|
| FBgn0035587 | CG4623      | CG4623                                           | -2.02 | 0.00 |
| FBgn0014869 | Pgym78      | Phosphoglyceromutase                             | -2.03 | 0.00 |
| FBgn0032308 | Porin2      | Porin2                                           | -2.03 | 0.00 |
| FBgn0020018 | Ppox        | Protoporphyrinogen oxidase                       | -2.03 | 0.00 |
| FBgn0017567 | ND23        | NADH:ubiquinone reductase 23kD subunit precursor | -2.03 | 0.00 |
| FBgn0039252 | CG11771     | CG11771                                          | -2.03 | 0.00 |
| FBgn0019928 | Ser8        | Ser8                                             | -2.03 | 0.00 |
| FBgn0039311 | CG10513     | CG10513                                          | -2.03 | 0.00 |
| FBgn0035070 | CG3650      | CG3650                                           | -2.04 | 0.00 |
| FBgn0050035 | CG30035     | CG30035                                          | -2.04 | 0.00 |
| FBgn0000409 | Cyt-c-p     | Cytochrome c proximal                            | -2.04 | 0.00 |
| FBgn0037389 | CG10991     | CG10991                                          | -2.04 | 0.00 |
| FBgn0035147 | CG12030     | CG12030                                          | -2.04 | 0.00 |
| FBgn0010516 | wal         | walrus                                           | -2.05 | 0.00 |
| FBgn0040321 | GNBP3       | Gram-negative bacteria binding protein 3         | -2.05 | 0.00 |
| FBgn0026409 | Mpcp        | Mitochondrial phosphate carrier protein          | -2.05 | 0.00 |
| FBgn0028938 | CG16886     | CG16886                                          | -2.05 | 0.00 |
| FBgn0000355 | Cp15        | Chorion protein 15                               | -2.05 | 0.00 |
| FBgn0053161 | CG32269     | CG32269                                          | -2.06 | 0.00 |
| FBgn0033672 | rho-7       | rhomboid-7                                       | -2.06 | 0.00 |
| FBgn0035611 | CG13285     | CG13285                                          | -2.06 | 0.00 |
| FBgn0003450 | snk         | snake                                            | -2.06 | 0.00 |
| FBgn0037358 | CG2185      | CG2185                                           | -2.06 | 0.00 |
| FBgn0022709 | Adk1        | Adenylate kinase-1                               | -2.06 | 0.00 |
| FBgn0025837 | CG17636     | CG17636                                          | -2.07 | 0.00 |
| FBgn0031380 | Got2        | Glutamate oxaloacetate transaminase 2            | -2.07 | 0.00 |
| FBgn0030759 | CG13014     | CG13014                                          | -2.07 | 0.00 |
| FBgn0011768 | Fdh         | Formaldehyde dehydrogenase                       | -2.07 | 0.00 |
| FBgn0002569 | LvpD        | Larval visceral protein D                        | -2.08 | 0.00 |
| FBgn0023477 | Tal         | Tal                                              | -2.08 | 0.00 |
| FBgn0032237 | CG5362      | CG5362                                           | -2.08 | 0.00 |
| FBgn0033294 | CG8693      | CG8693                                           | -2.08 | 0.00 |
| FBgn0004236 | alphaTub67C | alpha-Tubulin at 67C                             | -2.08 | 0.00 |
| FBgn0030980 | CG7406      | CG7406                                           | -2.08 | 0.00 |
| FBgn0031307 | CG4726      | CG4726                                           | -2.09 | 0.00 |
| FBgn0030992 | CG33253     | CG33253                                          | -2.09 | 0.00 |

|             |                |                                                  |       |      |
|-------------|----------------|--------------------------------------------------|-------|------|
| FBgn0020910 | RpL3           | Ribosomal protein L3                             | -2.09 | 0.00 |
| FBgn0034716 | Oatp58Dc       | Organic anion transporting polypeptide 58Dc      | -2.09 | 0.00 |
| FBgn0032413 | CG16997        | CG16997                                          | -2.09 | 0.00 |
| FBgn0028569 | robl37BC       | robl37BC                                         | -2.10 | 0.00 |
| FBgn0038922 | CG6439         | CG6439                                           | -2.11 | 0.00 |
| FBgn0037298 | CG2604         | CG2604                                           | -2.11 | 0.00 |
| FBgn0029827 | CG6048         | CG6048                                           | -2.11 | 0.00 |
| FBgn0033787 | CG13321        | CG13321                                          | -2.11 | 0.00 |
| FBgn0031813 | CG9527         | CG9527                                           | -2.11 | 0.00 |
| FBgn0032412 | CG16996        | CG16996                                          | -2.12 | 0.00 |
| FBgn0037123 | CG14569        | CG14569                                          | -2.12 | 0.00 |
| FBgn0034141 | CG8311         | CG8311                                           | -2.12 | 0.00 |
| FBgn0035967 | CG4641         | CG4641                                           | -2.12 | 0.00 |
| FBgn0039143 | CG5991         | CG5991                                           | -2.12 | 0.00 |
| FBgn0034436 | CG11961        | CG11961                                          | -2.12 | 0.00 |
| FBgn0001995 | mRpL4          | mitochondrial ribosomal protein L4               | -2.12 | 0.00 |
| FBgn0017566 | ND75           | NADH:ubiquinone reductase 75kD subunit precursor | -2.12 | 0.00 |
| FBgn0037724 | Fst            | Frost                                            | -2.12 | 0.00 |
| FBgn0032187 | CG4839         | CG4839                                           | -2.12 | 0.00 |
| FBgn0032312 | CG14071        | CG14071                                          | -2.12 | 0.00 |
| FBgn0020653 | Trxr-1         | Thioredoxin reductase-1                          | -2.13 | 0.00 |
| FBgn0028945 | CG7631         | CG7631                                           | -2.13 | 0.00 |
| FBgn0030073 | CG10962        | CG10962                                          | -2.13 | 0.00 |
| FBgn0027610 | CG8790         | CG8790                                           | -2.14 | 0.00 |
| FBgn0003889 | betaTub85D     | beta-Tubulin at 85D                              | -2.14 | 0.00 |
| FBgn0039857 | RpL6           | Ribosomal protein L6                             | -2.14 | 0.00 |
| FBgn0033317 | CG8635         | CG8635                                           | -2.14 | 0.00 |
| FBgn0024891 | ferrochelatase | ferrochelatase                                   | -2.15 | 0.00 |
| FBgn0039777 | Jon99Fii       | Jonah 99Fii                                      | -2.15 | 0.00 |
| FBgn0004465 | Su(P)          | Suppressor of ref(2)P sterility                  | -2.15 | 0.00 |
| FBgn0051302 | CG31302        | CG31302                                          | -2.15 | 0.00 |
| FBgn0031544 | CG17593        | CG17593                                          | -2.15 | 0.00 |
| FBgn0000579 | Eno            | Enolase                                          | -2.15 | 0.00 |
| FBgn0033393 | CG8029         | CG8029                                           | -2.15 | 0.00 |
| FBgn0033999 | CG8093         | CG8093                                           | -2.16 | 0.00 |
| FBgn0035788 | CG8541         | CG8541                                           | -2.16 | 0.00 |

|             |            |                                           |       |      |
|-------------|------------|-------------------------------------------|-------|------|
| FBgn0026872 | CG14777    | CG14777                                   | -2.16 | 0.00 |
| FBgn0020508 | Ag5r2      | Antigen 5-related 2                       | -2.16 | 0.00 |
| FBgn0033644 | CG8234     | CG8234                                    | -2.16 | 0.00 |
| FBgn0003980 | Vm26Ab     | Vitelline membrane 26Ab                   | -2.16 | 0.00 |
| FBgn0033296 | CG11669    | CG11669                                   | -2.16 | 0.00 |
| FBgn0026314 | Ugt35b     | UDP-glycosyltransferase 35b               | -2.16 | 0.00 |
| FBgn0037797 | CG12420    | CG12420                                   | -2.16 | 0.00 |
| FBgn0036663 | CG9674     | CG9674                                    | -2.17 | 0.00 |
| FBgn0003888 | betaTub60D | beta-Tubulin at 60D                       | -2.17 | 0.00 |
| FBgn0031497 | CG17259    | CG17259                                   | -2.17 | 0.00 |
| FBgn0038466 | CG8907     | CG8907                                    | -2.17 | 0.00 |
| FBgn0034417 | CG15117    | CG15117                                   | -2.17 | 0.00 |
| FBgn0035195 | Sac1       | Sac1                                      | -2.18 | 0.00 |
| FBgn0016031 | lama       | lamina ancestor                           | -2.18 | 0.00 |
| FBgn0037024 | CG4365     | CG4365                                    | -2.18 | 0.00 |
| FBgn0003887 | betaTub56D | beta-Tubulin at 56D                       | -2.18 | 0.00 |
| FBgn0052600 | dpr8       | dpr8                                      | -2.18 | 0.00 |
| FBgn0033048 | CG7881     | CG7881                                    | -2.18 | 0.00 |
| FBgn0002723 | Rst(1)JH   | Resistance to Juvenile Hormone            | -2.18 | 0.00 |
| FBgn0024939 | RpL8       | Ribosomal protein L8                      | -2.18 | 0.00 |
| FBgn0032177 | CG33301    | CG33301                                   | -2.19 | 0.00 |
| FBgn0050493 | CG30493    | CG30493                                   | -2.19 | 0.00 |
| FBgn0037163 | CG11440    | CG11440                                   | -2.19 | 0.00 |
| FBgn0039435 | CG14240    | CG14240                                   | -2.19 | 0.00 |
| FBgn0032024 | CG14273    | CG14273                                   | -2.19 | 0.00 |
| FBgn0034783 | CG9825     | CG9825                                    | -2.20 | 0.00 |
| FBgn0030731 | CG3415     | CG3415                                    | -2.20 | 0.00 |
| FBgn0032066 | CG9463     | CG9463                                    | -2.21 | 0.01 |
| FBgn0051463 | CG31463    | CG31463                                   | -2.21 | 0.00 |
| FBgn0035359 | CG1143     | CG1143                                    | -2.21 | 0.00 |
| FBgn0036639 | CG4229     | CG4229                                    | -2.21 | 0.00 |
| FBgn0030347 | CG15739    | CG15739                                   | -2.22 | 0.00 |
| FBgn0024315 | Picot      | Picot                                     | -2.22 | 0.00 |
| FBgn0019624 | CoVa       | Cytochrome c oxidase subunit Va           | -2.22 | 0.00 |
| FBgn0016691 | Oscp       | Oligomycin sensitivity-conferring protein | -2.22 | 0.00 |
| FBgn0032222 | CG5037     | CG5037                                    | -2.22 | 0.00 |

|             |           |                                       |       |      |
|-------------|-----------|---------------------------------------|-------|------|
| FBgn0031660 | mRpL28    | mitochondrial ribosomal protein L28   | -2.23 | 0.00 |
| FBgn0025640 | CG13369   | CG13369                               | -2.23 | 0.00 |
| FBgn0038038 | CG5167    | CG5167                                | -2.23 | 0.00 |
| FBgn0035667 | Jon65Ai   | Jonah 65Ai                            | -2.24 | 0.00 |
| FBgn0001128 | Gpdh      | Glycerol 3 phosphate dehydrogenase    | -2.24 | 0.00 |
| FBgn0036682 | Nc73EF    | Neural conserved at 73EF              | -2.24 | 0.00 |
| FBgn0036597 | CG4962    | CG4962                                | -2.24 | 0.00 |
| FBgn0023537 | CG17896   | CG17896                               | -2.24 | 0.00 |
| FBgn0036227 | CG17826   | CG17826                               | -2.24 | 0.00 |
| FBgn0032833 | CG10664   | CG10664                               | -2.25 | 0.00 |
| FBgn0037718 | CG8286    | CG8286                                | -2.25 | 0.00 |
| FBgn0003965 | v         | vermillion                            | -2.26 | 0.00 |
| FBgn0034295 | CG10911   | CG10911                               | -2.26 | 0.00 |
| FBgn0010609 | l(2)44DEa | lethal (2) 44DEa                      | -2.26 | 0.00 |
| FBgn0035780 | CG18417   | CG18417                               | -2.26 | 0.00 |
| FBgn0039873 | CG2191    | CG2191                                | -2.26 | 0.00 |
| FBgn0038646 | CG7715    | CG7715                                | -2.27 | 0.00 |
| FBgn0020655 | Gap69C    | GTPase-activating protein 69C         | -2.27 | 0.00 |
| FBgn0014026 | RpL7A     | Ribosomal protein L7A                 | -2.27 | 0.00 |
| FBgn0039045 | CG17119   | CG17119                               | -2.27 | 0.00 |
| FBgn0010434 | cora      | coracle                               | -2.27 | 0.00 |
| FBgn0033382 | CG8058    | CG8058                                | -2.27 | 0.00 |
| FBgn0037801 | CG3999    | CG3999                                | -2.27 | 0.00 |
| FBgn0039612 | CG14523   | CG14523                               | -2.28 | 0.00 |
| FBgn0020509 | Acp62F    | Accessory gland peptide 62F           | -2.28 | 0.00 |
| FBgn0037125 | CG14573   | CG14573                               | -2.29 | 0.00 |
| FBgn0001098 | Gdh       | Glutamate dehydrogenase               | -2.29 | 0.00 |
| FBgn0001187 | Hex-C     | Hexokinase C                          | -2.29 | 0.00 |
| FBgn0004167 | kst       | karst                                 | -2.29 | 0.00 |
| FBgn0004780 | Ccp84Ad   | Ccp84Ad                               | -2.29 | 0.00 |
| FBgn0041630 | Hexo1     | Hexosaminidase 1                      | -2.29 | 0.00 |
| FBgn0020368 | Vha68-1   | Vha68-1                               | -2.30 | 0.00 |
| FBgn0034553 | CG9993    | CG9993                                | -2.31 | 0.00 |
| FBgn0035254 | CG7974    | CG7974                                | -2.31 | 0.00 |
| FBgn0033903 | CG8323    | CG8323                                | -2.31 | 0.00 |
| FBgn0034629 | Acox57D-d | acyl-Coenzyme A oxidase at 57D distal | -2.32 | 0.00 |

|             |             |                                              |       |      |
|-------------|-------------|----------------------------------------------|-------|------|
| FBgn0035023 | itp         | ion transport peptide                        | -2.32 | 0.00 |
| FBgn0031706 | mid         | midline                                      | -2.33 | 0.00 |
| FBgn0027525 | CG7686      | CG7686                                       | -2.33 | 0.00 |
| FBgn0037131 | CG14564     | CG14564                                      | -2.33 | 0.00 |
| FBgn0038658 | CG14292     | CG14292                                      | -2.34 | 0.00 |
| FBgn0046114 | Gclm        | Glutamate-cysteine ligase modifier subunit   | -2.34 | 0.00 |
| FBgn0026721 | fat-spondin | fat-spondin                                  | -2.34 | 0.00 |
| FBgn0035552 | CG11350     | CG11350                                      | -2.34 | 0.00 |
| FBgn0037873 | CG6666      | CG6666                                       | -2.35 | 0.00 |
| FBgn0039440 | CG5471      | CG5471                                       | -2.35 | 0.00 |
| FBgn0034711 | CG3290      | CG3290                                       | -2.35 | 0.00 |
| FBgn0032069 | CG9468      | CG9468                                       | -2.35 | 0.00 |
| FBgn0036949 | CG7290      | CG7290                                       | -2.36 | 0.00 |
| FBgn0036234 | CG17824     | CG17824                                      | -2.36 | 0.00 |
| FBgn0052473 | CG32473     | CG32473                                      | -2.36 | 0.00 |
| FBgn0032754 | CG10700     | CG10700                                      | -2.36 | 0.00 |
| FBgn0033883 | CG16935     | CG16935                                      | -2.37 | 0.00 |
| FBgn0027571 | CG3523      | CG3523                                       | -2.37 | 0.00 |
| FBgn0031940 | CG7214      | CG7214                                       | -2.37 | 0.00 |
| FBgn0032114 | Aldh        | Aldehyde dehydrogenase                       | -2.37 | 0.00 |
| FBgn0016120 | ATPsyn-d    | ATP synthase, subunit d                      | -2.37 | 0.00 |
| FBgn0036321 | CG14120     | CG14120                                      | -2.37 | 0.00 |
| FBgn0034432 | CG7461      | CG7461                                       | -2.38 | 0.00 |
| FBgn0020618 | Rack1       | Receptor of activated protein kinase C 1     | -2.38 | 0.00 |
| FBgn0019982 | Gs1l        | GS1-like                                     | -2.38 | 0.00 |
| FBgn0014903 | CG14630     | CG14630                                      | -2.38 | 0.00 |
| FBgn0034576 | CG9350      | CG9350                                       | -2.39 | 0.00 |
| FBgn0033101 | CG9436      | CG9436                                       | -2.39 | 0.00 |
| FBgn0026562 | BM-40-SPARC | BM-40-SPARC                                  | -2.39 | 0.00 |
| FBgn0004888 | Scsalph     | Succinyl coenzyme A synthetase alpha subunit | -2.39 | 0.00 |
| FBgn0037715 | CG9399      | CG9399                                       | -2.39 | 0.00 |
| FBgn0033814 | CG4670      | CG4670                                       | -2.40 | 0.00 |
| FBgn0037387 | CG1213      | CG1213                                       | -2.40 | 0.00 |
| FBgn0040227 | eIF-3p66    | Eukaryotic initiation factor 3 p66 subunit   | -2.40 | 0.00 |
| FBgn0039537 | CG5590      | CG5590                                       | -2.40 | 0.00 |
| FBgn0036233 | CG6947      | CG6947                                       | -2.40 | 0.00 |

|             |          |                              |       |      |
|-------------|----------|------------------------------|-------|------|
| FBgn0010611 | Hmgs     | HMG Coenzyme A synthase      | -2.41 | 0.00 |
| FBgn0037135 | CG7414   | CG7414                       | -2.42 | 0.00 |
| FBgn0039434 | CG5468   | CG5468                       | -2.42 | 0.00 |
| FBgn0033879 | CG6543   | CG6543                       | -2.42 | 0.00 |
| FBgn0031206 | CG12466  | CG12466                      | -2.42 | 0.00 |
| FBgn0035779 | CG8562   | CG8562                       | -2.42 | 0.00 |
| FBgn0027868 | Nup170   | Nup170                       | -2.43 | 0.00 |
| FBgn0030478 | CG1640   | CG1640                       | -2.43 | 0.00 |
| FBgn0028983 | Spn6     | Serine protease inhibitor 6  | -2.43 | 0.00 |
| FBgn0033235 | CG8728   | CG8728                       | -2.43 | 0.00 |
| FBgn0025117 | und      | uninitiated                  | -2.43 | 0.00 |
| FBgn0020764 | Alas     | Aminolevulinatase synthase   | -2.44 | 0.00 |
| FBgn0037955 | CG6950   | CG6950                       | -2.44 | 0.00 |
| FBgn0030218 | CG1628   | CG1628                       | -2.44 | 0.00 |
| FBgn0033229 | CG12822  | CG12822                      | -2.44 | 0.00 |
| FBgn0035404 | CG12079  | CG12079                      | -2.44 | 0.00 |
| FBgn0038135 | CG8773   | CG8773                       | -2.44 | 0.00 |
| FBgn0032292 | CG6750   | CG6750                       | -2.45 | 0.00 |
| FBgn0004782 | Ccp84Ab  | Ccp84Ab                      | -2.45 | 0.00 |
| FBgn0037714 | CG9396   | CG9396                       | -2.45 | 0.00 |
| FBgn0039774 | CDase    | Ceramidase                   | -2.45 | 0.00 |
| FBgn0024992 | CG2658   | CG2658                       | -2.47 | 0.00 |
| FBgn0051063 | CG31063  | CG31063                      | -2.47 | 0.00 |
| FBgn0031069 | CG12703  | CG12703                      | -2.48 | 0.00 |
| FBgn0026593 | CG5707   | CG5707                       | -2.48 | 0.00 |
| FBgn0030932 | CG6461   | CG6461                       | -2.49 | 0.00 |
| FBgn0014455 | Ahcy13   | Adenosylhomocysteinase at 13 | -2.49 | 0.00 |
| FBgn0000100 | RpLP0    | Ribosomal protein LP0        | -2.49 | 0.00 |
| FBgn0039769 | CG15534  | CG15534                      | -2.49 | 0.00 |
| FBgn0039349 | CG4685   | CG4685                       | -2.49 | 0.00 |
| FBgn0039886 | CG2003   | CG2003                       | -2.49 | 0.00 |
| FBgn0019644 | ATPsyn-b | ATP synthase, subunit b      | -2.49 | 0.00 |
| FBgn0033904 | CG18327  | CG18327                      | -2.49 | 0.00 |
| FBgn0033703 | CG13170  | CG13170                      | -2.50 | 0.00 |
| FBgn0010295 | ng3      | new glue 3                   | -2.51 | 0.00 |
| FBgn0020236 | ATPCL    | ATP citrate lyase            | -2.51 | 0.00 |



|             |              |                                |       |      |
|-------------|--------------|--------------------------------|-------|------|
| FBgn0039760 | CG9682       | CG9682                         | -2.51 | 0.00 |
| FBgn0030853 | CG5703       | CG5703                         | -2.51 | 0.00 |
| FBgn0037146 | CG7470       | CG7470                         | -2.51 | 0.00 |
| FBgn0028533 | CG7953       | CG7953                         | -2.52 | 0.00 |
| FBgn0021872 | Xbp1         | X box binding protein-1        | -2.53 | 0.00 |
| FBgn0038645 | CG7714       | CG7714                         | -2.53 | 0.00 |
| FBgn0039849 | CG11334      | CG11334                        | -2.53 | 0.00 |
| FBgn0033367 | CG8193       | CG8193                         | -2.54 | 0.00 |
| FBgn0015623 | Cpr          | Cytochrome P450 reductase      | -2.54 | 0.00 |
| FBgn0004654 | Pgd          | Phosphogluconate dehydrogenase | -2.54 | 0.00 |
| FBgn0003886 | alphaTub85E  | alpha-Tubulin at 85E           | -2.54 | 0.00 |
| FBgn0033765 | nemy         | no extended memory             | -2.54 | 0.00 |
| FBgn0010357 | betaTry      | betaTrypsin                    | -2.54 | 0.00 |
| FBgn0030993 | Mec2         | Mec2                           | -2.55 | 0.00 |
| FBgn0001220 | Hsc70-5      | Heat shock protein cognate 5   | -2.55 | 0.00 |
| FBgn0034582 | CG10531      | CG10531                        | -2.55 | 0.00 |
| FBgn0034588 | CG9394       | CG9394                         | -2.55 | 0.00 |
| FBgn0037517 | CG10086      | CG10086                        | -2.56 | 0.00 |
| FBgn0040364 | CG11378      | CG11378                        | -2.56 | 0.00 |
| FBgn0038986 | CG5278       | CG5278                         | -2.56 | 0.00 |
| FBgn0039453 | CG6403       | CG6403                         | -2.58 | 0.00 |
| FBgn0033184 | CG12736      | CG12736                        | -2.58 | 0.00 |
| FBgn0003517 | sta          | stubarista                     | -2.58 | 0.00 |
| FBgn0032779 | CG16771      | CG16771                        | -2.59 | 0.00 |
| FBgn0028534 | CG7916       | CG7916                         | -2.59 | 0.00 |
| FBgn0037891 | CG5214       | CG5214                         | -2.60 | 0.00 |
| FBgn0032144 | CG17633      | CG17633                        | -2.60 | 0.00 |
| FBgn0025620 | CG13360      | CG13360                        | -2.61 | 0.00 |
| FBgn0024957 | Irp-1B       | Iron regulatory protein 1B     | -2.61 | 0.00 |
| FBgn0029969 | CG10932      | CG10932                        | -2.62 | 0.00 |
| FBgn0032407 | CG5325       | CG5325                         | -2.62 | 0.00 |
| FBgn0039697 | CG7834       | CG7834                         | -2.63 | 0.00 |
| FBgn0003884 | alphaTub84B  | alpha-Tubulin at 84B           | -2.63 | 0.00 |
| FBgn0028948 | CG15253      | CG15253                        | -2.63 | 0.00 |
| FBgn0020235 | ATPsyn-gamma | ATP synthase-gamma chain       | -2.63 | 0.00 |
| FBgn0010425 | epsilonTry   | epsilonTrypsin                 | -2.63 | 0.00 |

|             |             |                                                  |       |      |
|-------------|-------------|--------------------------------------------------|-------|------|
| FBgn0010213 | Sod2        | Superoxide dismutase 2 (Mn)                      | -2.63 | 0.00 |
| FBgn0029889 | l(1)G0255   | lethal (1) G0255                                 | -2.63 | 0.00 |
| FBgn0040349 | CG3699      | CG3699                                           | -2.64 | 0.00 |
| FBgn0032511 | CG9306      | CG9306                                           | -2.64 | 0.00 |
| FBgn0039609 | CG14529     | CG14529                                          | -2.65 | 0.00 |
| FBgn0030400 | CG11138     | CG11138                                          | -2.66 | 0.00 |
| FBgn0034497 | CG9090      | CG9090                                           | -2.66 | 0.00 |
| FBgn0036551 | CG17029     | CG17029                                          | -2.66 | 0.00 |
| FBgn0003885 | alphaTub84D | alpha-Tubulin at 84D                             | -2.66 | 0.00 |
| FBgn0005671 | Vha55       | Vacuolar H[+]-ATPase 55kD B subunit              | -2.68 | 0.00 |
| FBgn0035887 | Jon66Cii    | Jonah 66Cii                                      | -2.68 | 0.00 |
| FBgn0040336 | CG9904      | CG9904                                           | -2.68 | 0.00 |
| FBgn0033047 | CG7882      | CG7882                                           | -2.68 | 0.00 |
| FBgn0029807 | CG3108      | CG3108                                           | -2.69 | 0.00 |
| FBgn0035619 | CG10592     | CG10592                                          | -2.69 | 0.00 |
| FBgn0035360 | CG1246      | CG1246                                           | -2.69 | 0.00 |
| FBgn0031912 | CG5261      | CG5261                                           | -2.70 | 0.00 |
| FBgn0039736 | CG7912      | CG7912                                           | -2.73 | 0.00 |
| FBgn0031801 | CG9498      | CG9498                                           | -2.73 | 0.00 |
| FBgn0029890 | CG4095      | CG4095                                           | -2.74 | 0.00 |
| FBgn0034490 | CG9864      | CG9864                                           | -2.75 | 0.00 |
| FBgn0033226 | CG1882      | CG1882                                           | -2.77 | 0.00 |
| FBgn0014028 | SdhB        | Succinate dehydrogenase B                        | -2.78 | 0.00 |
| FBgn0035343 | CG16762     | CG16762                                          | -2.78 | 0.00 |
| FBgn0039438 | CG6452      | CG6452                                           | -2.80 | 0.00 |
| FBgn0035670 | CG10472     | CG10472                                          | -2.80 | 0.00 |
| FBgn0035770 | pst         | pastrel                                          | -2.80 | 0.00 |
| FBgn0039471 | CG6295      | CG6295                                           | -2.80 | 0.00 |
| FBgn0037699 | CG8147      | CG8147                                           | -2.81 | 0.00 |
| FBgn0032373 | CG12602     | CG12602                                          | -2.81 | 0.00 |
| FBgn0016123 | Aph-4       | Alkaline phosphatase 4                           | -2.81 | 0.00 |
| FBgn0020367 | Vha68-2     | Vha68-2                                          | -2.82 | 0.00 |
| FBgn0039737 | CG7920      | CG7920                                           | -2.83 | 0.00 |
| FBgn0019957 | ND42        | NADH:ubiquinone reductase 42kD subunit precursor | -2.84 | 0.00 |
| FBgn0036023 | CG18179     | CG18179                                          | -2.84 | 0.00 |
| FBgn0029869 | l(1)G0030   | lethal (1) G0030                                 | -2.85 | 0.00 |

|             |           |                                    |       |      |
|-------------|-----------|------------------------------------|-------|------|
| FBgn0035513 | CG1259    | CG1259                             | -2.86 | 0.00 |
| FBgn0033760 | CG8785    | CG8785                             | -2.86 | 0.00 |
| FBgn0003863 | alphaTry  | alphaTrypsin                       | -2.87 | 0.00 |
| FBgn0021906 | RFeSP     | Rieske iron-sulfur protein         | -2.93 | 0.00 |
| FBgn0034294 | CG5765    | CG5765                             | -2.94 | 0.00 |
| FBgn0034479 | CG8654    | CG8654                             | -2.95 | 0.00 |
| FBgn0034388 | CG15092   | CG15092                            | -2.96 | 0.00 |
| FBgn0039439 | CG6460    | CG6460                             | -2.96 | 0.00 |
| FBgn0043470 | lambdaTry | lambdaTry                          | -2.97 | 0.00 |
| FBgn0032947 | CG17571   | CG17571                            | -2.97 | 0.00 |
| FBgn0038925 | CG6022    | CG6022                             | -2.99 | 0.00 |
| FBgn0033465 | CG12140   | CG12140                            | -2.99 | 0.00 |
| FBgn0034712 | CG3264    | CG3264                             | -3.00 | 0.00 |
| FBgn0036622 | CG4753    | CG4753                             | -3.01 | 0.00 |
| FBgn0038271 | CG3731    | CG3731                             | -3.01 | 0.00 |
| FBgn0030776 | CG4653    | CG4653                             | -3.02 | 0.00 |
| FBgn0039756 | CG9743    | CG9743                             | -3.02 | 0.00 |
| FBgn0035582 | CG13705   | CG13705                            | -3.02 | 0.00 |
| FBgn0030775 | CG9673    | CG9673                             | -3.04 | 0.00 |
| FBgn0038136 | CG8774    | CG8774                             | -3.04 | 0.00 |
| FBgn0033319 | Jon44E    | Jonah 44E                          | -3.05 | 0.00 |
| FBgn0050457 | CG30457   | CG30457                            | -3.06 | 0.00 |
| FBgn0036367 | CG10116   | CG10116                            | -3.06 | 0.00 |
| FBgn0037204 | CG11131   | CG11131                            | -3.07 | 0.00 |
| FBgn0036762 | CG7430    | CG7430                             | -3.08 | 0.00 |
| FBgn0051410 | CG31410   | CG31410                            | -3.08 | 0.00 |
| FBgn0036950 | CG6996    | CG6996                             | -3.08 | 0.00 |
| FBgn0015032 | Cyp4c3    | Cytochrome P450-4c3                | -3.09 | 0.00 |
| FBgn0052237 | CG32237   | CG32237                            | -3.10 | 0.00 |
| FBgn0024556 | EfTuM     | Elongation factor Tu mitochondrial | -3.11 | 0.00 |
| FBgn0051305 | CG6782    | CG6782                             | -3.11 | 0.00 |
| FBgn0031741 | CG11034   | CG11034                            | -3.12 | 0.00 |
| FBgn0019960 | CG6455    | CG6455                             | -3.12 | 0.00 |
| FBgn0036024 | CG18180   | CG18180                            | -3.12 | 0.00 |
| FBgn0019830 | colt      | congested-like trachea             | -3.14 | 0.00 |
| FBgn0028583 | lcs       | la costa                           | -3.15 | 0.00 |

|             |            |                                        |       |      |
|-------------|------------|----------------------------------------|-------|------|
| FBgn0034710 | CG3292     | CG3292                                 | -3.16 | 0.00 |
| FBgn0015568 | alpha-Est1 | alpha-Esterase-1                       | -3.18 | 0.00 |
| FBgn0002719 | Men        | Malic enzyme                           | -3.20 | 0.00 |
| FBgn0030999 | CG7874     | CG7874                                 | -3.20 | 0.00 |
| FBgn0030264 | CG1961     | CG1961                                 | -3.23 | 0.00 |
| FBgn0039635 | CG11876    | CG11876                                | -3.23 | 0.00 |
| FBgn0052564 | CG32564    | CG32564                                | -3.28 | 0.00 |
| FBgn0036948 | CG7298     | CG7298                                 | -3.30 | 0.00 |
| FBgn0033720 | CG13160    | CG13160                                | -3.30 | 0.00 |
| FBgn0028473 | CG8801     | CG8801                                 | -3.33 | 0.00 |
| FBgn0038400 | CG5903     | CG5903                                 | -3.37 | 0.00 |
| FBgn0024293 | Spn43Ab    | Serine protease inhibitor 43Ab         | -3.37 | 0.00 |
| FBgn0036951 | CG7017     | CG7017                                 | -3.40 | 0.00 |
| FBgn0036953 | CG17145    | CG17145                                | -3.42 | 0.00 |
| FBgn0037001 | CG6020     | CG6020                                 | -3.45 | 0.00 |
| FBgn0040363 | CG11384    | CG11384                                | -3.46 | 0.00 |
| FBgn0053138 | CG33138    | CG33138                                | -3.47 | 0.00 |
| FBgn0030668 | CG8128     | CG8128                                 | -3.48 | 0.00 |
| FBgn0002571 | LvpL       | Larval visceral protein L              | -3.50 | 0.00 |
| FBgn0033604 | CG9070     | CG9070                                 | -3.61 | 0.00 |
| FBgn0011556 | zetaTry    | zetaTrypsin                            | -3.63 | 0.00 |
| FBgn0052296 | Mrtf       | Myocardin-related transcription factor | -3.63 | 0.00 |
| FBgn0031533 | CG2772     | CG2772                                 | -3.65 | 0.00 |
| FBgn0012034 | AcCoAS     | Acetyl Coenzyme A synthase             | -3.71 | 0.00 |
| FBgn0035600 | CG4769     | CG4769                                 | -3.72 | 0.00 |
| FBgn0032068 | CG9466     | CG9466                                 | -3.75 | 0.00 |
| FBgn0028949 | CG15254    | CG15254                                | -3.75 | 0.00 |
| FBgn0033782 | sug        | sugarbabe                              | -3.83 | 0.00 |
| FBgn0000473 | Cyp6a2     | Cytochrome P450-6a2                    | -3.86 | 0.00 |
| FBgn0034390 | CG15093    | CG15093                                | -3.98 | 0.00 |
| FBgn0031771 | CG9140     | CG9140                                 | -4.04 | 0.00 |
| FBgn0016078 | wun        | wunen                                  | -4.06 | 0.00 |
| FBgn0023507 | CG3835     | CG3835                                 | -4.08 | 0.00 |
| FBgn0036831 | CG6839     | CG6839                                 | -4.11 | 0.00 |
| FBgn0030774 | CG9675     | CG9675                                 | -4.11 | 0.00 |
| FBgn0031654 | Jon25Bii   | Jonah 25Bii                            | -4.11 | 0.00 |

|             |            |                                   |       |      |
|-------------|------------|-----------------------------------|-------|------|
| FBgn0022160 | I(2)k05713 | lethal (2) k05713                 | -4.22 | 0.00 |
| FBgn0036642 | CG4169     | CG4169                            | -4.24 | 0.00 |
| FBgn0034247 | CG6484     | CG6484                            | -4.24 | 0.00 |
| FBgn0030148 | CG3106     | CG3106                            | -4.34 | 0.00 |
| FBgn0035781 | CG8560     | CG8560                            | -4.41 | 0.00 |
| FBgn0031538 | CG3246     | CG3246                            | -4.74 | 0.00 |
| FBgn0035006 | CG4563     | CG4563                            | -4.76 | 0.00 |
| FBgn0003149 | Prm        | Paramyosin                        | -4.77 | 0.00 |
| FBgn0033423 | CG1809     | CG1809                            | -4.83 | 0.00 |
| FBgn0033327 | PGRP-SC1b  | PGRP-SC1b                         | -5.00 | 0.00 |
| FBgn0033079 | Fmo-2      | Flavin-containing monooxygenase 2 | -5.10 | 0.00 |
| FBgn0046878 | Obp83cd    | Odorant-binding protein 83cd      | -5.18 | 0.00 |
| FBgn0037996 | CG4830     | CG4830                            | -5.49 | 0.00 |
| FBgn0033830 | CG10814    | CG10814                           | -6.57 | 0.00 |
| FBgn0037230 | CG9780     | CG9780                            | -6.67 | 0.00 |
| FBgn0033246 | CG11198    | CG11198                           | -6.92 | 0.00 |
