# Supplementary material for: Mechanisms Underlying Hypoxia Tolerance in Drosophila melanogaster: hairy as a Metabolic Switch
Source: PubMed Central journal article supplement (PMC2556400; doi:10.1371/journal.pgen.1000221), 2008-10-17
Supplement: pgen.1000221.s003.pdf [file pgen.1000221.s003.pdf]

**Table S2.** List of Significantly Altered Genes in Hypoxia-Selected *Drosophila melanogaster* at Adult Stage

| Flybase ID  | Symbol   | Full_name                                 | Fold Change | q-value(%) |
|-------------|----------|-------------------------------------------|-------------|------------|
| FBgn0041579 | AttC     | Attacin C                                 | 4.85        | 0.00       |
| FBgn0034317 | CR14499  | CR14499                                   | 4.35        | 0.00       |
| FBgn0036068 | CG6640   | CG6640                                    | 3.54        | 0.00       |
| FBgn0030929 | CG15043  | CG15043                                   | 3.08        | 0.00       |
| FBgn0038346 | CG14872  | CG14872                                   | 3.06        | 0.00       |
| FBgn0035994 | CG14179  | CG14179                                   | 2.96        | 0.00       |
| FBgn0033788 | CG13323  | CG13323                                   | 2.90        | 0.00       |
| FBgn0040957 | CG14272  | CG14272                                   | 2.68        | 0.00       |
| FBgn0033659 | Damm     | Death associated molecule related to Mch2 | 2.67        | 0.00       |
| FBgn0035176 | CG13905  | CG13905                                   | 2.53        | 0.00       |
| FBgn0033789 | CG13324  | CG13324                                   | 2.52        | 0.00       |
| FBgn0041581 | AttB     | Attacin B                                 | 2.49        | 0.00       |
| FBgn0033857 | CG13335  | CG13335                                   | 2.44        | 0.00       |
| FBgn0035868 | CG7194   | CG7194                                    | 2.38        | 0.00       |
| FBgn0004427 | LysD     | Lysozyme D                                | 2.37        | 0.00       |
| FBgn0032493 | CG15479  | CG15479                                   | 2.36        | 0.00       |
| FBgn0033301 | CG12780  | CG12780                                   | 2.36        | 0.00       |
| FBgn0040923 | CG11368  | CG11368                                   | 2.35        | 0.00       |
| FBgn0012042 | AttA     | attacin A                                 | 2.32        | 0.00       |
| FBgn0034407 | DptB     | Diptericin B                              | 2.28        | 0.00       |
| FBgn0025692 | CG3814   | CG3814                                    | 2.26        | 0.00       |
| FBgn0036232 | CG14125  | CG14125                                   | 2.24        | 0.00       |
| FBgn0037562 | CG11671  | CG11671                                   | 2.23        | 0.00       |
| FBgn0010385 | Def      | defensin                                  | 2.22        | 0.00       |
| FBgn0031176 | CG1678   | CG1678                                    | 2.20        | 0.00       |
| FBgn0033787 | CG13321  | CG13321                                   | 2.19        | 0.00       |
| FBgn0030262 | Vago     | Vago                                      | 2.16        | 0.00       |
| FBgn0034160 | CG5550   | CG5550                                    | 2.14        | 0.00       |
| FBgn0038353 | CG5399   | CG5399                                    | 2.12        | 0.00       |
| FBgn0028583 | lcs      | la costa                                  | 2.10        | 0.00       |
| FBgn0034294 | CG5765   | CG5765                                    | 2.05        | 0.00       |
| FBgn0036951 | CG7017   | CG7017                                    | 2.05        | 0.00       |
| FBgn0030040 | CG15347  | CG15347                                   | 2.04        | 0.00       |
| FBgn0043578 | PGRP-SB1 | PGRP-SB1                                  | 2.03        | 0.00       |

|             |          |                                |      |      |
|-------------|----------|--------------------------------|------|------|
| FBgn0024361 | Tsp2A    | Tetraspanin 2A                 | 1.99 | 0.00 |
| FBgn0031489 | CG17224  | CG17224                        | 1.93 | 0.00 |
| FBgn0035743 | CG15829  | CG15829                        | 1.91 | 0.00 |
| FBgn0038074 | CG6188   | CG6188                         | 1.90 | 0.00 |
| FBgn0034758 | CG13510  | CG13510                        | 1.89 | 0.00 |
| FBgn0033560 | CG30015  | CG30015                        | 1.89 | 0.00 |
| FBgn0033173 | CG30502  | CG30502                        | 1.89 | 0.00 |
| FBgn0034871 | CG3906   | CG3906                         | 1.87 | 0.00 |
| FBgn0031033 | CG14219  | CG14219                        | 1.86 | 0.00 |
| FBgn0038292 | CG3987   | CG3987                         | 1.84 | 0.00 |
| FBgn0034331 | CG15067  | CG15067                        | 1.84 | 0.00 |
| FBgn0040887 | CG33254  | CG33254                        | 1.82 | 0.00 |
| FBgn0036833 | CG3819   | CG3819                         | 1.80 | 0.00 |
| FBgn0039756 | CG9743   | CG9743                         | 1.79 | 0.00 |
| FBgn0025454 | Cyp6g1   | Cyp6g1                         | 1.79 | 0.00 |
| FBgn0040832 | CG8012   | CG8012                         | 1.78 | 0.00 |
| FBgn0036203 | CG6004   | CG6004                         | 1.77 | 0.00 |
| FBgn0028932 | CG16890  | CG16890                        | 1.73 | 0.00 |
| FBgn0033124 | Tsp42Ec  | Tetraspanin 42Ec               | 1.72 | 0.00 |
| FBgn0020416 | ldgf1    | Imaginal disc growth factor1   | 1.70 | 0.00 |
| FBgn0031021 | CG12203  | CG12203                        | 1.68 | 0.00 |
| FBgn0036945 | CG6981   | CG6981                         | 1.67 | 0.00 |
| FBgn0028940 | Cyp28a5  | Cyp28a5                        | 1.67 | 0.00 |
| FBgn0004240 | Dpt      | Diptericin                     | 1.66 | 0.00 |
| FBgn0039109 | CG10365  | CG10365                        | 1.65 | 0.00 |
| FBgn0015010 | Ag5r     | antigen 5-related              | 1.65 | 0.00 |
| FBgn0038957 | CG7059   | CG7059                         | 1.64 | 0.00 |
| FBgn0027562 | CG10345  | CG10345                        | 1.63 | 0.00 |
| FBgn0015772 | Nak      | Numb-associated kinase         | 1.63 | 0.00 |
| FBgn0039774 | CDase    | Ceramidase                     | 1.62 | 0.00 |
| FBgn0030487 | CG12726  | CG12726                        | 1.62 | 0.00 |
| FBgn0037809 | CG12818  | CG12818                        | 1.60 | 0.00 |
| FBgn0002733 | HLHmbeta | E(spl) region transcript mbeta | 1.60 | 0.00 |
| FBgn0032836 | CG10680  | CG10680                        | 1.60 | 0.00 |
| FBgn0035770 | pst      | pastrel                        | 1.60 | 0.00 |
| FBgn0032202 | CG18619  | CG18619                        | 1.59 | 0.00 |
| FBgn0003961 | Uro      | Urate oxidase                  | 1.59 | 0.00 |

|             |           |                                          |       |      |
|-------------|-----------|------------------------------------------|-------|------|
| FBgn0031830 | CG11015   | CG11015                                  | 1.58  | 0.00 |
| FBgn0038198 | CG3153    | CG3153                                   | 1.58  | 0.00 |
| FBgn0013307 | Odc1      | ornithine decarboxylase                  | 1.57  | 0.00 |
| FBgn0038294 | Zeelin1   | Zeelin1                                  | 1.56  | 0.00 |
| FBgn0022355 | Tsf1      | Transferrin                              | 1.56  | 0.00 |
| FBgn0034144 | CG5089    | CG5089                                   | 1.56  | 0.00 |
| FBgn0003274 | RpLP2     | Ribosomal protein LP2                    | 1.55  | 0.00 |
| FBgn0040582 | CG5791    | CG5791                                   | 1.55  | 0.00 |
| FBgn0039319 | CG13659   | CG13659                                  | 1.55  | 0.00 |
| FBgn0027785 | NP15.6    | NP15.6                                   | 1.54  | 0.00 |
| FBgn0030304 | Cyp4g15   | Cyp4g15                                  | 1.54  | 0.00 |
| FBgn0020618 | Rack1     | Receptor of activated protein kinase C 1 | 1.54  | 0.00 |
| FBgn0036433 | CG9628    | CG9628                                   | 1.54  | 0.00 |
| FBgn0031502 | CG3524    | CG3524                                   | 1.53  | 0.00 |
| FBgn0033953 | CG12861   | CG12861                                  | 1.53  | 0.00 |
| FBgn0040993 | CG17325   | CG17325                                  | 1.53  | 0.00 |
| FBgn0028381 | decay     | caspase-3 protein                        | 1.52  | 0.00 |
| FBgn0034128 | CG4409    | CG4409                                   | 1.52  | 0.00 |
| FBgn0034538 | CG16799   | CG16799                                  | 1.52  | 0.00 |
| FBgn0040735 | CG16836   | CG16836                                  | 1.51  | 0.00 |
| FBgn0014184 | Oda       | gut feeling                              | 1.51  | 0.00 |
| FBgn0028542 | CG33115   | CG33115                                  | 1.50  | 0.00 |
| FBgn0027525 | CG7686    | CG7686                                   | 1.50  | 0.00 |
| FBgn0023549 | Mct1      | Monocarboxylate transporter 1            | 1.50  | 0.00 |
| FBgn0031769 | CG9135    | CG9135                                   | -1.51 | 0.00 |
| FBgn0031057 | CG14224   | CG14224                                  | -1.54 | 0.00 |
| FBgn0030377 | CG1924    | CG1924                                   | -1.54 | 0.00 |
| FBgn0033361 | CG8181    | CG8181                                   | -1.54 | 0.00 |
| FBgn0015283 | Pros54    | Proteasome 54kD subunit                  | -1.54 | 0.00 |
| FBgn0034629 | Acox57D-d | acyl-Coenzyme A oxidase at 57D distal    | -1.54 | 0.00 |
| FBgn0010247 | Parp      | Poly-(ADP-ribose) polymerase             | -1.55 | 0.00 |
| FBgn0027505 | rab3-GAP  | rab3-GAP                                 | -1.56 | 0.00 |
| FBgn0034143 | CG8303    | CG8303                                   | -1.56 | 0.00 |
| FBgn0039257 | tnc       | tenectin                                 | -1.58 | 0.00 |
| FBgn0003717 | TI        | toll / Toll                              | -1.58 | 0.00 |
| FBgn0000427 | dec-1     | Defective chorion 1                      | -1.59 | 0.00 |
| FBgn0036549 | CG10516   | CG10516                                  | -1.59 | 0.00 |

|             |                 |                                            |       |      |
|-------------|-----------------|--------------------------------------------|-------|------|
| FBgn0035802 | CG33275         | CG33275                                    | -1.61 | 0.00 |
| FBgn0033718 | CG13162         | CG13162                                    | -1.61 | 0.00 |
| FBgn0020517 | Skeletor        | Skeletor                                   | -1.61 | 0.00 |
| FBgn0013343 | Syx1A           | Syntaxin1A                                 | -1.62 | 0.00 |
| FBgn0029004 | Img             | lemming                                    | -1.64 | 0.00 |
| FBgn0033816 | CG4679          | CG4679                                     | -1.65 | 0.00 |
| FBgn0024289 | Sodh-1          | Sorbitol dehydrogenase 1                   | -1.67 | 0.00 |
| FBgn0031754 | CG13997         | CG13997                                    | -1.67 | 0.00 |
| FBgn0039891 | CG31998         | CG31998                                    | -1.68 | 0.00 |
| FBgn0039473 | CG17191         | CG17191                                    | -1.68 | 0.00 |
| FBgn0014076 | Vm32E           | Vitelline membrane 32E                     | -1.72 | 0.00 |
| FBgn0001225 | Hsp26           | heat shock protein hsp26                   | -1.74 | 0.00 |
| FBgn0038611 | CG14309         | CG14309                                    | -1.75 | 0.00 |
| FBgn0003358 | Jon99Ci         | Jonah 99Ci                                 | -1.75 | 0.00 |
| FBgn0039181 | BRWD3           | BRWD3                                      | -1.78 | 0.00 |
| FBgn0036996 | CG5932          | CG5932                                     | -1.79 | 0.00 |
| FBgn0032127 | CG13114         | CG13114                                    | -1.80 | 0.00 |
| FBgn0002562 | Lsp1alpha       | Larval serum protein 1 alpha               | -1.81 | 0.00 |
| FBgn0031342 | CG31661         | CG31661                                    | -1.85 | 0.00 |
| FBgn0037763 | CG16904         | CG16904                                    | -1.88 | 0.00 |
| FBgn0038914 | fit             | female-specific independent of transformer | -1.93 | 0.00 |
| FBgn0039945 | CG17159         | CG17159                                    | -2.00 | 0.00 |
| FBgn0032736 | CG31792/CG31793 | CG31792/CG31793                            | -2.03 | 0.00 |
| FBgn0020906 | Jon25Bi         | Jonah 25B / Jonah 25Bi / Serine protease 4 | -2.04 | 0.00 |
| FBgn0039471 | CG6295          | CG6295                                     | -2.05 | 0.00 |
| FBgn0031654 | Jon25Bii        | Jonah 25B / Jonah 25Bii                    | -2.12 | 0.00 |
| FBgn0031653 | Jon25Biii       | Jonah 25B / Jonah 25Biii                   | -2.24 | 0.00 |
| FBgn0032249 | CG5337          | CG5337                                     | -2.29 | 0.00 |
| FBgn0017424 | CG11538         | CG11538                                    | -2.88 | 0.00 |
| FBgn0039472 | CG17192         | CG17192                                    | -2.97 | 0.00 |
