# Supplementary material for: Mechanisms Underlying Hypoxia Tolerance in Drosophila melanogaster: hairy as a Metabolic Switch
Source: PubMed Central journal article supplement (PMC2556400; doi:10.1371/journal.pgen.1000221), 2008-10-17
Supplement: pgen.1000221.s004.pdf [file pgen.1000221.s004.pdf]

**Table S3.** List of Significantly Altered Biological Processes in Hypoxia-Selected *Drosophila melanogaster* at Larval Stage

| GOID  | GO Name                                                           | Number Changed | Number Measured | Number in GO | % Changed | % Present | p value |
|-------|-------------------------------------------------------------------|----------------|-----------------|--------------|-----------|-----------|---------|
| 35159 | regulation of tracheal tube length                                | 4              | 4               | 7            | 100.0     | 57.143    | 0.009   |
| 7599  | hemostasis                                                        | 3              | 3               | 7            | 100.0     | 42.857    | 0.009   |
| 6106  | fumarate metabolism                                               | 3              | 3               | 5            | 100.0     | 60.000    | 0.010   |
| 35046 | pronuclear migration                                              | 3              | 3               | 10           | 100.0     | 30.000    | 0.011   |
| 6559  | L-phenylalanine catabolism                                        | 3              | 3               | 5            | 100.0     | 60.000    | 0.014   |
| 6572  | tyrosine catabolism                                               | 3              | 3               | 3            | 100.0     | 100.000   | 0.014   |
| 6558  | L-phenylalanine metabolism                                        | 3              | 3               | 5            | 100.0     | 60.000    | 0.014   |
| 9074  | aromatic amino acid family catabolism                             | 3              | 3               | 5            | 100.0     | 60.000    | 0.014   |
| 6573  | valine metabolism                                                 | 3              | 3               | 8            | 100.0     | 37.500    | 0.020   |
| 6542  | glutamine biosynthesis                                            | 2              | 2               | 4            | 100.0     | 50.000    | 0.052   |
| 48052 | R1/R6 cell differentiation (sensu Endopterygota)                  | 2              | 2               | 3            | 100.0     | 66.667    | 0.056   |
| 7462  | R1/R6 cell fate commitment                                        | 2              | 2               | 3            | 100.0     | 66.667    | 0.056   |
| 50817 | coagulation                                                       | 2              | 2               | 3            | 100.0     | 66.667    | 0.057   |
| 7295  | egg chamber growth (sensu Insecta)                                | 2              | 2               | 3            | 100.0     | 66.667    | 0.057   |
| 9618  | response to pathogenic bacteria                                   | 2              | 2               | 5            | 100.0     | 40.000    | 0.058   |
| 42829 | defense response to pathogen                                      | 2              | 2               | 5            | 100.0     | 40.000    | 0.058   |
| 42828 | response to pathogen                                              | 2              | 2               | 5            | 100.0     | 40.000    | 0.058   |
| 42830 | defense response to pathogenic bacteria                           | 2              | 2               | 5            | 100.0     | 40.000    | 0.058   |
| 6568  | tryptophan metabolism                                             | 2              | 2               | 10           | 100.0     | 20.000    | 0.058   |
| 18195 | peptidyl-arginine modification                                    | 2              | 2               | 3            | 100.0     | 66.667    | 0.060   |
| 19919 | peptidyl-arginine methylation\, to asymmetrical-dimethyl arginine | 2              | 2               | 3            | 100.0     | 66.667    | 0.060   |
| 18216 | peptidyl-arginine methylation                                     | 2              | 2               | 3            | 100.0     | 66.667    | 0.060   |
| 8359  | regulation of bicoid mRNA localization                            | 2              | 2               | 2            | 100.0     | 100.000   | 0.060   |
| 35246 | peptidyl-arginine N-methylation                                   | 2              | 2               | 3            | 100.0     | 66.667    | 0.060   |
| 35247 | peptidyl-arginine omega-N-methylation                             | 2              | 2               | 3            | 100.0     | 66.667    | 0.060   |
| 6856  | eye pigment precursor transport                                   | 2              | 2               | 2            | 100.0     | 100.000   | 0.061   |
| 6433  | prolyl-tRNA aminoacylation                                        | 2              | 2               | 4            | 100.0     | 50.000    | 0.062   |
| 51084 | posttranslational protein folding                                 | 2              | 2               | 5            | 100.0     | 40.000    | 0.063   |
| 35044 | sperm aster formation                                             | 2              | 2               | 3            | 100.0     | 66.667    | 0.064   |
| 42417 | dopamine metabolism                                               | 2              | 2               | 7            | 100.0     | 28.571    | 0.066   |
| 42542 | response to hydrogen peroxide                                     | 2              | 2               | 2            | 100.0     | 100.000   | 0.068   |
| 302   | response to reactive oxygen species                               | 2              | 2               | 2            | 100.0     | 100.000   | 0.068   |
| 42744 | hydrogen peroxide catabolism                                      | 2              | 2               | 2            | 100.0     | 100.000   | 0.068   |

|       |                                                |    |    |    |       |         |       |
|-------|------------------------------------------------|----|----|----|-------|---------|-------|
| 6750  | glutathione biosynthesis                       | 2  | 2  | 7  | 100.0 | 28.571  | 0.068 |
| 42743 | hydrogen peroxide metabolism                   | 2  | 2  | 2  | 100.0 | 100.000 | 0.068 |
| 6749  | glutathione metabolism                         | 2  | 2  | 7  | 100.0 | 28.571  | 0.068 |
| 5992  | trehalose biosynthesis                         | 2  | 2  | 3  | 100.0 | 66.667  | 0.069 |
| 46351 | disaccharide biosynthesis                      | 2  | 2  | 3  | 100.0 | 66.667  | 0.069 |
| 6637  | acyl-CoA metabolism                            | 2  | 2  | 3  | 100.0 | 66.667  | 0.073 |
| 9066  | aspartate family amino acid metabolism         | 2  | 2  | 7  | 100.0 | 28.571  | 0.074 |
| 6555  | methionine metabolism                          | 2  | 2  | 5  | 100.0 | 40.000  | 0.074 |
| 16973 | poly(A)+ mRNA export from nucleus              | 2  | 2  | 2  | 100.0 | 100.000 | 0.078 |
| 19439 | aromatic compound catabolism                   | 6  | 7  | 15 | 85.7  | 46.667  | 0.000 |
| 6084  | acetyl-CoA metabolism                          | 15 | 18 | 30 | 83.3  | 60.000  | 0.000 |
| 51187 | cofactor catabolism                            | 15 | 18 | 30 | 83.3  | 60.000  | 0.000 |
| 8362  | embryonic cuticle biosynthesis (sensu Insecta) | 5  | 6  | 20 | 83.3  | 30.000  | 0.007 |
| 9109  | coenzyme catabolism                            | 14 | 17 | 29 | 82.4  | 58.621  | 0.000 |
| 6099  | tricarboxylic acid cycle                       | 13 | 16 | 27 | 81.3  | 59.259  | 0.000 |
| 9060  | aerobic respiration                            | 13 | 16 | 27 | 81.3  | 59.259  | 0.000 |
| 45333 | cellular respiration                           | 13 | 16 | 27 | 81.3  | 59.259  | 0.000 |
| 46356 | acetyl-CoA catabolism                          | 13 | 16 | 27 | 81.3  | 59.259  | 0.000 |
| 6090  | pyruvate metabolism                            | 4  | 5  | 10 | 80.0  | 50.000  | 0.017 |
| 6094  | gluconeogenesis                                | 4  | 5  | 10 | 80.0  | 50.000  | 0.017 |
| 19991 | septate junction assembly                      | 4  | 5  | 11 | 80.0  | 45.455  | 0.019 |
| 9410  | response to xenobiotic stimulus                | 4  | 5  | 15 | 80.0  | 33.333  | 0.021 |
| 6805  | xenobiotic metabolism                          | 4  | 5  | 15 | 80.0  | 33.333  | 0.021 |
| 6570  | tyrosine metabolism                            | 7  | 9  | 13 | 77.8  | 69.231  | 0.005 |
| 51258 | protein polymerization                         | 13 | 17 | 33 | 76.5  | 51.515  | 0.000 |
| 7561  | imaginal disc eversion                         | 3  | 4  | 7  | 75.0  | 57.143  | 0.041 |
| 5991  | trehalose metabolism                           | 3  | 4  | 12 | 75.0  | 33.333  | 0.045 |
| 5984  | disaccharide metabolism                        | 3  | 4  | 12 | 75.0  | 33.333  | 0.045 |
| 6941  | striated muscle contraction                    | 3  | 4  | 37 | 75.0  | 10.811  | 0.049 |
| 9081  | branched chain family amino acid metabolism    | 3  | 4  | 9  | 75.0  | 44.444  | 0.050 |
| 42594 | response to starvation                         | 3  | 4  | 12 | 75.0  | 33.333  | 0.051 |
| 44242 | cellular lipid catabolism                      | 3  | 4  | 9  | 75.0  | 44.444  | 0.054 |
| 46693 | sperm storage                                  | 3  | 4  | 7  | 75.0  | 57.143  | 0.057 |
| 6586  | indolalkylamine metabolism                     | 3  | 4  | 14 | 75.0  | 28.571  | 0.065 |
| 6004  | fucose metabolism                              | 3  | 4  | 7  | 75.0  | 57.143  | 0.070 |
| 6778  | porphyrin metabolism                           | 8  | 11 | 17 | 72.7  | 64.706  | 0.001 |
| 6098  | pentose-phosphate shunt                        | 5  | 7  | 9  | 71.4  | 77.778  | 0.018 |

|       |                                                            |    |     |     |      |        |       |
|-------|------------------------------------------------------------|----|-----|-----|------|--------|-------|
| 6739  | NADP metabolism                                            | 5  | 7   | 9   | 71.4 | 77.778 | 0.018 |
| 6740  | NADPH regeneration                                         | 5  | 7   | 9   | 71.4 | 77.778 | 0.018 |
| 6779  | porphyrin biosynthesis                                     | 7  | 10  | 16  | 70.0 | 62.500 | 0.003 |
| 6120  | mitochondrial electron transport\, NADH to ubiquinone      | 7  | 10  | 17  | 70.0 | 58.824 | 0.005 |
| 9072  | aromatic amino acid family metabolism                      | 10 | 15  | 28  | 66.7 | 53.571 | 0.001 |
| 42168 | heme metabolism                                            | 6  | 9   | 12  | 66.7 | 75.000 | 0.013 |
| 42430 | indole and derivative metabolism                           | 4  | 6   | 17  | 66.7 | 35.294 | 0.042 |
| 42434 | indole derivative metabolism                               | 4  | 6   | 17  | 66.7 | 35.294 | 0.042 |
| 42438 | melanin biosynthesis                                       | 4  | 6   | 10  | 66.7 | 60.000 | 0.044 |
| 9253  | peptidoglycan catabolism                                   | 7  | 11  | 14  | 63.6 | 78.571 | 0.007 |
| 272   | polysaccharide catabolism                                  | 10 | 16  | 25  | 62.5 | 64.000 | 0.001 |
| 44247 | cellular polysaccharide catabolism                         | 10 | 16  | 25  | 62.5 | 64.000 | 0.001 |
| 6046  | N-acetylglucosamine catabolism                             | 10 | 16  | 25  | 62.5 | 64.000 | 0.001 |
| 6043  | glucosamine catabolism                                     | 10 | 16  | 25  | 62.5 | 64.000 | 0.001 |
| 46348 | amino sugar catabolism                                     | 10 | 16  | 25  | 62.5 | 64.000 | 0.001 |
| 6032  | chitin catabolism                                          | 10 | 16  | 25  | 62.5 | 64.000 | 0.001 |
| 6446  | regulation of translational initiation                     | 5  | 8   | 14  | 62.5 | 57.143 | 0.033 |
| 6582  | melanin metabolism                                         | 5  | 8   | 14  | 62.5 | 57.143 | 0.033 |
| 6783  | heme biosynthesis                                          | 5  | 8   | 11  | 62.5 | 72.727 | 0.033 |
| 43297 | apical junction assembly                                   | 8  | 13  | 38  | 61.5 | 34.211 | 0.004 |
| 270   | peptidoglycan metabolism                                   | 8  | 13  | 22  | 61.5 | 59.091 | 0.005 |
| 6092  | main pathways of carbohydrate metabolism                   | 37 | 63  | 131 | 58.7 | 48.092 | 0.000 |
| 42775 | ATP synthesis coupled electron transport (sensu Eukaryota) | 7  | 12  | 23  | 58.3 | 52.174 | 0.016 |
| 15980 | energy derivation by oxidation of organic compounds        | 42 | 73  | 155 | 57.5 | 47.097 | 0.000 |
| 35151 | regulation of tracheal tube size                           | 8  | 14  | 27  | 57.1 | 51.852 | 0.005 |
| 7043  | intercellular junction assembly                            | 8  | 14  | 39  | 57.1 | 35.897 | 0.011 |
| 42773 | ATP synthesis coupled electron transport                   | 8  | 14  | 26  | 57.1 | 53.846 | 0.012 |
| 6961  | antibacterial humoral response (sensu Protostomia)         | 8  | 14  | 43  | 57.1 | 32.558 | 0.014 |
| 16080 | synaptic vesicle targeting                                 | 4  | 7   | 13  | 57.1 | 53.846 | 0.080 |
| 6406  | mRNA export from nucleus                                   | 4  | 7   | 10  | 57.1 | 70.000 | 0.084 |
| 45176 | apical protein localization                                | 4  | 7   | 15  | 57.1 | 46.667 | 0.087 |
| 46364 | monosaccharide biosynthesis                                | 4  | 7   | 14  | 57.1 | 50.000 | 0.097 |
| 46165 | alcohol biosynthesis                                       | 4  | 7   | 14  | 57.1 | 50.000 | 0.097 |
| 19319 | hexose biosynthesis                                        | 4  | 7   | 14  | 57.1 | 50.000 | 0.097 |
| 51186 | cofactor metabolism                                        | 58 | 103 | 192 | 56.3 | 53.646 | 0.000 |
| 6012  | galactose metabolism                                       | 5  | 9   | 14  | 55.6 | 64.286 | 0.048 |
| 6769  | nicotinamide metabolism                                    | 5  | 9   | 14  | 55.6 | 64.286 | 0.050 |

|       |                                                       |    |    |     |      |        |       |
|-------|-------------------------------------------------------|----|----|-----|------|--------|-------|
| 9166  | nucleotide catabolism                                 | 5  | 9  | 15  | 55.6 | 60.000 | 0.058 |
| 7097  | nuclear migration                                     | 5  | 9  | 23  | 55.6 | 39.130 | 0.063 |
| 16052 | carbohydrate catabolism                               | 37 | 67 | 119 | 55.2 | 56.303 | 0.000 |
| 44275 | cellular carbohydrate catabolism                      | 37 | 67 | 119 | 55.2 | 56.303 | 0.000 |
| 45087 | innate immune response                                | 11 | 20 | 41  | 55.0 | 48.780 | 0.005 |
| 51647 | nucleus localization                                  | 6  | 11 | 26  | 54.5 | 42.308 | 0.045 |
| 45793 | positive regulation of cell size                      | 6  | 11 | 25  | 54.5 | 44.000 | 0.046 |
| 42060 | wound healing                                         | 6  | 11 | 23  | 54.5 | 47.826 | 0.046 |
| 40003 | cuticle biosynthesis (sensu Insecta)                  | 6  | 11 | 43  | 54.5 | 25.581 | 0.047 |
| 7592  | cuticle biosynthesis (sensu Protostomia and Nematoda) | 6  | 11 | 43  | 54.5 | 25.581 | 0.047 |
| 6732  | coenzyme metabolism                                   | 49 | 91 | 173 | 53.8 | 52.601 | 0.000 |
| 18958 | phenol metabolism                                     | 7  | 13 | 24  | 53.8 | 54.167 | 0.023 |
| 6584  | catecholamine metabolism                              | 7  | 13 | 24  | 53.8 | 54.167 | 0.023 |
| 51168 | nuclear export                                        | 7  | 13 | 20  | 53.8 | 65.000 | 0.026 |
| 45216 | intercellular junction assembly and/or maintenance    | 9  | 17 | 46  | 52.9 | 36.957 | 0.011 |
| 6986  | response to unfolded protein                          | 9  | 17 | 50  | 52.9 | 34.000 | 0.016 |
| 6631  | fatty acid metabolism                                 | 15 | 29 | 56  | 51.7 | 51.786 | 0.004 |
| 6952  | defense response                                      | 39 | 76 | 342 | 51.3 | 22.222 | 0.000 |
| 6955  | immune response                                       | 32 | 63 | 186 | 50.8 | 33.871 | 0.000 |
| 19318 | hexose metabolism                                     | 35 | 70 | 150 | 50.0 | 46.667 | 0.000 |
| 6119  | oxidative phosphorylation                             | 28 | 56 | 100 | 50.0 | 56.000 | 0.000 |
| 6006  | glucose metabolism                                    | 23 | 46 | 109 | 50.0 | 42.202 | 0.000 |
| 35150 | regulation of tube size                               | 8  | 16 | 33  | 50.0 | 48.485 | 0.028 |
| 9611  | response to wounding                                  | 8  | 16 | 35  | 50.0 | 45.714 | 0.044 |
| 9620  | response to fungi                                     | 7  | 14 | 45  | 50.0 | 31.111 | 0.046 |
| 6733  | oxidoreduction coenzyme metabolism                    | 7  | 14 | 23  | 50.0 | 60.870 | 0.054 |
| 6633  | fatty acid biosynthesis                               | 7  | 14 | 31  | 50.0 | 45.161 | 0.057 |
| 9063  | amino acid catabolism                                 | 7  | 14 | 27  | 50.0 | 51.852 | 0.061 |
| 44274 | organismal biosynthesis                               | 7  | 14 | 46  | 50.0 | 30.435 | 0.071 |
| 42335 | cuticle biosynthesis                                  | 7  | 14 | 46  | 50.0 | 30.435 | 0.071 |
| 7291  | sperm individualization                               | 6  | 12 | 23  | 50.0 | 52.174 | 0.087 |
| 6100  | tricarboxylic acid cycle intermediate metabolism      | 6  | 12 | 30  | 50.0 | 40.000 | 0.092 |
| 5996  | monosaccharide metabolism                             | 36 | 73 | 155 | 49.3 | 47.097 | 0.000 |
| 46034 | ATP metabolism                                        | 22 | 45 | 78  | 48.9 | 57.692 | 0.002 |
| 46164 | alcohol catabolism                                    | 21 | 43 | 88  | 48.8 | 48.864 | 0.000 |
| 9607  | response to biotic stimulus                           | 39 | 80 | 355 | 48.8 | 22.535 | 0.000 |
| 19320 | hexose catabolism                                     | 19 | 39 | 78  | 48.7 | 50.000 | 0.001 |

|       |                                                                 |     |     |     |      |        |       |
|-------|-----------------------------------------------------------------|-----|-----|-----|------|--------|-------|
| 46365 | monosaccharide catabolism                                       | 19  | 39  | 78  | 48.7 | 50.000 | 0.001 |
| 6007  | glucose catabolism                                              | 19  | 39  | 78  | 48.7 | 50.000 | 0.001 |
| 42742 | defense response to bacteria                                    | 17  | 35  | 112 | 48.6 | 31.250 | 0.005 |
| 9617  | response to bacteria                                            | 17  | 35  | 112 | 48.6 | 31.250 | 0.005 |
| 19731 | antibacterial humoral response                                  | 11  | 23  | 56  | 47.8 | 41.071 | 0.025 |
| 6754  | ATP biosynthesis                                                | 21  | 44  | 76  | 47.7 | 57.895 | 0.002 |
| 6753  | nucleoside phosphate metabolism                                 | 21  | 44  | 76  | 47.7 | 57.895 | 0.002 |
| 15985 | energy coupled proton transport\, down electrochemical gradient | 20  | 42  | 74  | 47.6 | 56.757 | 0.003 |
| 15986 | ATP synthesis coupled proton transport                          | 20  | 42  | 74  | 47.6 | 56.757 | 0.003 |
| 16065 | humoral defense mechanism (sensu Protostomia)                   | 10  | 21  | 70  | 47.6 | 30.000 | 0.029 |
| 6960  | antimicrobial humoral response (sensu Protostomia)              | 10  | 21  | 70  | 47.6 | 30.000 | 0.029 |
| 35152 | regulation of tracheal tube architecture                        | 9   | 19  | 52  | 47.4 | 36.538 | 0.033 |
| 9141  | nucleoside triphosphate metabolism                              | 24  | 51  | 90  | 47.1 | 56.667 | 0.003 |
| 9116  | nucleoside metabolism                                           | 8   | 17  | 38  | 47.1 | 44.737 | 0.046 |
| 44270 | nitrogen compound catabolism                                    | 8   | 17  | 33  | 47.1 | 51.515 | 0.054 |
| 9310  | amine catabolism                                                | 8   | 17  | 33  | 47.1 | 51.515 | 0.054 |
| 6818  | hydrogen transport                                              | 23  | 49  | 97  | 46.9 | 50.515 | 0.003 |
| 15992 | proton transport                                                | 23  | 49  | 97  | 46.9 | 50.515 | 0.003 |
| 9205  | purine ribonucleoside triphosphate metabolism                   | 23  | 49  | 85  | 46.9 | 57.647 | 0.004 |
| 9144  | purine nucleoside triphosphate metabolism                       | 23  | 49  | 85  | 46.9 | 57.647 | 0.004 |
| 9199  | ribonucleoside triphosphate metabolism                          | 23  | 49  | 85  | 46.9 | 57.647 | 0.004 |
| 6752  | group transfer coenzyme metabolism                              | 22  | 47  | 91  | 46.8 | 51.648 | 0.003 |
| 46483 | heterocycle metabolism                                          | 21  | 45  | 91  | 46.7 | 49.451 | 0.001 |
| 46148 | pigment biosynthesis                                            | 14  | 30  | 59  | 46.7 | 50.847 | 0.012 |
| 6334  | nucleosome assembly                                             | 7   | 15  | 45  | 46.7 | 33.333 | 0.083 |
| 44262 | cellular carbohydrate metabolism                                | 110 | 237 | 463 | 46.4 | 51.188 | 0.000 |
| 6414  | translational elongation                                        | 6   | 13  | 17  | 46.2 | 76.471 | 0.098 |
| 51188 | cofactor biosynthesis                                           | 34  | 74  | 146 | 45.9 | 50.685 | 0.000 |
| 9201  | ribonucleoside triphosphate biosynthesis                        | 22  | 48  | 83  | 45.8 | 57.831 | 0.005 |
| 9206  | purine ribonucleoside triphosphate biosynthesis                 | 22  | 48  | 83  | 45.8 | 57.831 | 0.005 |
| 9145  | purine nucleoside triphosphate biosynthesis                     | 22  | 48  | 83  | 45.8 | 57.831 | 0.005 |
| 6575  | amino acid derivative metabolism                                | 11  | 24  | 52  | 45.8 | 46.154 | 0.031 |
| 6096  | glycolysis                                                      | 15  | 33  | 70  | 45.5 | 47.143 | 0.012 |
| 6576  | biogenic amine metabolism                                       | 10  | 22  | 49  | 45.5 | 44.898 | 0.048 |
| 8652  | amino acid biosynthesis                                         | 10  | 22  | 58  | 45.5 | 37.931 | 0.055 |
| 6066  | alcohol metabolism                                              | 50  | 111 | 237 | 45.0 | 46.835 | 0.000 |

|       |                                                |     |     |     |      |        |       |
|-------|------------------------------------------------|-----|-----|-----|------|--------|-------|
| 5975  | carbohydrate metabolism                        | 135 | 300 | 606 | 45.0 | 49.505 | 0.000 |
| 9142  | nucleoside triphosphate biosynthesis           | 22  | 49  | 86  | 44.9 | 56.977 | 0.007 |
| 42440 | pigment metabolism                             | 16  | 36  | 73  | 44.4 | 49.315 | 0.012 |
| 6082  | organic acid metabolism                        | 74  | 167 | 350 | 44.3 | 47.714 | 0.000 |
| 19752 | carboxylic acid metabolism                     | 74  | 167 | 350 | 44.3 | 47.714 | 0.000 |
| 9613  | response to pest\, pathogen or parasite        | 19  | 44  | 130 | 43.2 | 33.846 | 0.007 |
| 6030  | chitin metabolism                              | 39  | 91  | 165 | 42.9 | 55.152 | 0.000 |
| 9259  | ribonucleotide metabolism                      | 27  | 63  | 114 | 42.9 | 55.263 | 0.004 |
| 6959  | humoral immune response                        | 15  | 35  | 102 | 42.9 | 34.314 | 0.025 |
| 6041  | glucosamine metabolism                         | 41  | 96  | 172 | 42.7 | 55.814 | 0.000 |
| 6044  | N-acetylglucosamine metabolism                 | 41  | 96  | 172 | 42.7 | 55.814 | 0.000 |
| 6040  | amino sugar metabolism                         | 41  | 96  | 172 | 42.7 | 55.814 | 0.000 |
| 6091  | generation of precursor metabolites and energy | 169 | 396 | 772 | 42.7 | 51.295 | 0.000 |
| 19730 | antimicrobial humoral response                 | 14  | 33  | 97  | 42.4 | 34.021 | 0.045 |
| 9108  | coenzyme biosynthesis                          | 27  | 64  | 130 | 42.2 | 49.231 | 0.005 |
| 6163  | purine nucleotide metabolism                   | 27  | 64  | 117 | 42.2 | 54.701 | 0.006 |
| 9150  | purine ribonucleotide metabolism               | 26  | 62  | 111 | 41.9 | 55.856 | 0.007 |
| 9260  | ribonucleotide biosynthesis                    | 26  | 62  | 112 | 41.9 | 55.357 | 0.009 |
| 44271 | nitrogen compound biosynthesis                 | 13  | 31  | 74  | 41.9 | 41.892 | 0.069 |
| 9309  | amine biosynthesis                             | 13  | 31  | 74  | 41.9 | 41.892 | 0.069 |
| 44248 | cellular catabolism                            | 84  | 201 | 383 | 41.8 | 52.480 | 0.000 |
| 43207 | response to external biotic stimulus           | 22  | 53  | 172 | 41.5 | 30.814 | 0.007 |
| 6725  | aromatic compound metabolism                   | 29  | 70  | 137 | 41.4 | 51.095 | 0.002 |
| 6413  | translational initiation                       | 12  | 29  | 49  | 41.4 | 59.184 | 0.071 |
| 6164  | purine nucleotide biosynthesis                 | 26  | 63  | 115 | 41.3 | 54.783 | 0.009 |
| 9152  | purine ribonucleotide biosynthesis             | 25  | 61  | 109 | 41.0 | 55.963 | 0.010 |
| 9308  | amine metabolism                               | 97  | 237 | 458 | 40.9 | 51.747 | 0.000 |
| 6461  | protein complex assembly                       | 18  | 44  | 112 | 40.9 | 39.286 | 0.022 |
| 5976  | polysaccharide metabolism                      | 42  | 103 | 187 | 40.8 | 55.080 | 0.000 |
| 44264 | cellular polysaccharide metabolism             | 42  | 103 | 187 | 40.8 | 55.080 | 0.000 |
| 6807  | nitrogen compound metabolism                   | 99  | 243 | 475 | 40.7 | 51.158 | 0.000 |
| 6519  | amino acid and derivative metabolism           | 55  | 135 | 277 | 40.7 | 48.736 | 0.000 |
| 7028  | cytoplasm organization and biogenesis          | 17  | 42  | 85  | 40.5 | 49.412 | 0.030 |
| 19748 | secondary metabolism                           | 17  | 42  | 83  | 40.5 | 50.602 | 0.034 |
| 48515 | spermatid differentiation                      | 12  | 30  | 75  | 40.0 | 40.000 | 0.095 |
| 7286  | spermatid development                          | 12  | 30  | 75  | 40.0 | 40.000 | 0.095 |
| 6520  | amino acid metabolism                          | 47  | 118 | 245 | 39.8 | 48.163 | 0.002 |

|       |                                     |      |      |       |      |        |       |
|-------|-------------------------------------|------|------|-------|------|--------|-------|
| 6445  | regulation of translation           | 15   | 38   | 95    | 39.5 | 40.000 | 0.069 |
| 6118  | electron transport                  | 112  | 287  | 552   | 39.0 | 51.993 | 0.000 |
| 9056  | catabolism                          | 98   | 253  | 607   | 38.7 | 41.680 | 0.000 |
| 9889  | regulation of biosynthesis          | 17   | 44   | 106   | 38.6 | 41.509 | 0.064 |
| 31326 | regulation of cellular biosynthesis | 17   | 44   | 106   | 38.6 | 41.509 | 0.064 |
| 48232 | male gamete generation              | 23   | 64   | 295   | 35.9 | 21.695 | 0.090 |
| 7283  | spermatogenesis                     | 23   | 64   | 295   | 35.9 | 21.695 | 0.090 |
| 44255 | cellular lipid metabolism           | 37   | 104  | 214   | 35.6 | 48.598 | 0.027 |
| 9605  | response to external stimulus       | 41   | 116  | 316   | 35.3 | 36.709 | 0.026 |
| 9057  | macromolecule catabolism            | 53   | 151  | 283   | 35.1 | 53.357 | 0.012 |
| 43037 | translation                         | 38   | 109  | 217   | 34.9 | 50.230 | 0.025 |
| 9165  | nucleotide biosynthesis             | 34   | 99   | 201   | 34.3 | 49.254 | 0.070 |
| 44265 | cellular macromolecule catabolism   | 46   | 134  | 248   | 34.3 | 54.032 | 0.034 |
| 9058  | biosynthesis                        | 190  | 595  | 1195  | 31.9 | 49.791 | 0.000 |
| 44249 | cellular biosynthesis               | 167  | 534  | 1058  | 31.3 | 50.473 | 0.003 |
| 51641 | cellular localization               | 68   | 219  | 484   | 31.1 | 45.248 | 0.074 |
| 6810  | transport                           | 373  | 1238 | 2667  | 30.1 | 46.419 | 0.000 |
| 51234 | establishment of localization       | 413  | 1384 | 3202  | 29.8 | 43.223 | 0.000 |
| 51179 | localization                        | 425  | 1436 | 3341  | 29.6 | 42.981 | 0.002 |
| 6508  | proteolysis                         | 148  | 506  | 999   | 29.2 | 50.651 | 0.097 |
| 8152  | metabolism                          | 1044 | 3599 | 7699  | 29.0 | 46.746 | 0.000 |
| 43170 | macromolecule metabolism            | 596  | 2087 | 4513  | 28.6 | 46.244 | 0.001 |
| 44237 | cellular metabolism                 | 919  | 3225 | 6954  | 28.5 | 46.376 | 0.000 |
| 7582  | physiological process               | 1377 | 4904 | 10712 | 28.1 | 45.780 | 0.000 |
| 50875 | cellular physiological process      | 1226 | 4394 | 9679  | 27.9 | 45.397 | 0.000 |
| 44260 | cellular macromolecule metabolism   | 435  | 1567 | 3386  | 27.8 | 46.279 | 0.086 |
