# Supplementary material for: Mechanisms Underlying Hypoxia Tolerance in Drosophila melanogaster: hairy as a Metabolic Switch
Source: PubMed Central journal article supplement (PMC2556400; doi:10.1371/journal.pgen.1000221), 2008-10-17
Supplement: pgen.1000221.s006.pdf [file pgen.1000221.s006.pdf]

**Table S5.** Primers for qRT-PCR and ChIP-PCR Assays**Primers for qRT-PCR:**

| Gene ID     | Symbol    | Primer Sequences                                                               |
|-------------|-----------|--------------------------------------------------------------------------------|
| FBgn0039112 | CG10219   | Forward: 5' -GCTGCCTTCATAGCTCCATC-3'<br>Reverse: 5' -GGACGTTTCCAACGACAGAT-3'   |
| FBgn0035611 | CG13285   | Forward: 5' -TTATCAGGGTCAGCGGAATC-3'<br>Reverse: 5' -AGCCACGATAGGAACTCGAA-3'   |
| FBgn0040559 | CG14359   | Forward: 5' -CATTGCGCTCCTTGTAGGAT-3'<br>Reverse: 5' -TTGGACACGGTCCAGTTGTA-3'   |
| FBgn0030341 | CG1967    | Forward: 5' -CCCCGAAATGTTGTCAATCT-3'<br>Reverse: 5' -TTACCGGGAGGGGTCTTAAC-3'   |
| FBgn0030148 | CG3106    | Forward: 5' -ATCTTGTGCTTGGGTGGAAC-3'<br>Reverse: 5' -CCAAGTGGGAATTCGAGTGT-3'   |
| FBgn0033005 | CG3107    | Forward: 5' -TTGATTCCCAGCATGTTGAA-3'<br>Reverse: 5' -TCGCCATCATGATTCCATAA-3'   |
| FBgn0039453 | CG6403    | Forward: 5' -AAGGTGATAGCCGACGAATG-3'<br>Reverse: 5' -ACCTTGGTGTGCGAGTTTCAC-3'  |
| FBgn0038922 | CG6439    | Forward: 5' -ATCAATCCCGTGCTTAGTGC-3'<br>Reverse: 5' -AAAACGCCCTTAATGCACAC-3'   |
| FBgn0037873 | CG6666    | Forward: 5' -GTCCCACGACATTAGCCACT-3'<br>Reverse: 5' -AATACCATTGGCGGTGTGAT-3'   |
| FBgn0037955 | CG6950    | Forward: 5' -AAGCTCTGAGCCAGACAAGC-3'<br>Reverse: 5' -AAAGTCCTCCCCCAGATGTT-3'   |
| FBgn0037230 | CG9780    | Forward: 5' -AACTGGCCCAAATGTACTCG-3'<br>Reverse: 5' -GTCCAATCGCTCATCTCCAT-3'   |
| FBgn0001105 | Gbeta13F  | Forward: 5' -TCACATTTTTCCCGAATGGT-3'<br>Reverse: 5' -GTTGTCGTGCGAATACATGG-3'   |
| FBgn0001248 | Idh       | Forward: 5' -AAGCGCGTAGAGGAGTTCAA-3'<br>Reverse: 5' -AAGACGGTTCCTCCCAAGAT-3'   |
| FBgn0029869 | l(1)G0030 | Forward: 5' -AATGTGGGAGCCTATGTTTCG-3'<br>Reverse: 5' -GCTTGC GGAAGTTCTTTACG-3' |
| FBgn0031024 | l(1)G0156 | Forward: 5' -CAAGGAGGGCAAATACCTCA-3'<br>Reverse: 5' -TGCTACAGCTTATGCGGATG-3'   |
| FBgn0029889 | l(1)G0255 | Forward: 5' -CTGATCGTGTCCAATGTGCT-3'<br>Reverse: 5' -TGGATGCCATTACACAGTT-3'    |
| FBgn0033327 | PGRP-SC1b | Forward: 5' -GGGCAACTACCTCAGCTACG-3'<br>Reverse: 5' -GGTAGTTCTGGACGCTCTGC-3'   |
| FBgn0014028 | SdhB      | Forward: 5' -TCGACATCAACACCTCCAAG-3'<br>Reverse: 5' -TGTTGCGGTACTGCTCGTAG-3'   |

**Primers for ChIP-PCR:**

| Genomic Location of Amplicon | Adjacent Gene | Primer Sequences                                                             |
|------------------------------|---------------|------------------------------------------------------------------------------|
| 2R:<br>6722799..6723495      | CG12344       | Forward: 5' -CGGATGAAAGCCATTTGTTT-3'<br>Reverse: 5' -AAACACATTTCCAGCGAACC-3' |
| 3R:<br>6941829..6942330      | CG6629        | Forward: 5' -GCGCCTTTTTGTTAGCTTTG-3'<br>Reverse: 5' -ATTTTCCTTTTGCCAGCTT-3'  |
| X:<br>6244048..6244656       | l(1)G0030     | Forward: 5' -ACGGCTGTCACAACCACATA-3'<br>Reverse: 5' -AGGAAAGCGATTGCGATAAA-3' |
| 2R:<br>2695083..2695595      | SdhB          | Forward: 5' -TGCGCGCATGGTATATTTTA-3'<br>Reverse: 5' -TCTGCAAGTTCGGAGAATCA-3' |
