# Supplementary material for: Mechanisms Underlying Hypoxia Tolerance in Drosophila melanogaster: hairy as a Metabolic Switch
Source: PubMed Central journal article supplement (PMC2556400; doi:10.1371/journal.pgen.1000221), 2008-10-17
Supplement: pgen.1000221.s007.pdf [file pgen.1000221.s007.pdf]

**Table S6.** Summary of Genomic Locations of hairy Transcription Repressor Binding Elements in the *cis*-Regulatory Regions of Genes Encoding TCA Cycle Enzymes

| Gene ID   | Fold Change | Size of <i>cis</i> -regulatory region* | hairy Binding Element                                                                        |                                                                                        |
|-----------|-------------|----------------------------------------|----------------------------------------------------------------------------------------------|----------------------------------------------------------------------------------------|
|           |             |                                        | Location / Orientation                                                                       | Sequence                                                                               |
| l(1)G0030 | -2.86       | 4154 bp                                | 70-80 / -<br>1026-1036 / -<br>1088-1098 / +<br>1513-1523 / +                                 | catCACGCtcc<br>aagCACGCacc<br>gggCACGCttg<br>tggCACGCggg                               |
| Idh       | -1.89       | 5496 bp                                | 44-54 / +<br>953-963 / +<br>1152-1162 / +<br>1807-1817 / +<br>1983-1993 / +<br>3642-3652 / + | cagCACGCtcc<br>gggCACGCact<br>cggCACGCggt<br>acgCACGCtgc<br>ccaCACGCgcc<br>tgcCACGCgct |
| CG6439    | -2.08       | 2500 bp                                | 602-612 / -<br>865-875 / -<br>1096-1106 / -<br>2278-2288 / -                                 | agcCACGCtac<br>gtgCACGCcag<br>cgcCACGCgct<br>ggcCACGCgaa                               |
| l(1)G0156 | -1.96       | 2500 bp                                | 517-527 / -<br>1022-1032 / -<br>1046-1056 / -<br>2438-2448 / -                               | aggCACGCcgg<br>ataCACGCgca<br>ataCACGCgtc<br>catCACGCgct                               |
| Nc73EF    | -2.24       | 2500 bp                                | 2161-2175 / -<br>2259-2273 / -                                                               | aagCACGCgaa<br>gaaCACGCgg                                                              |
| CG33791   | -1.76       | 4260 bp                                | 2620-2634 / -                                                                                | agcCACGCaac                                                                            |
| CG7430    | -3.03       | 2500 bp                                | 920-930 / +<br>931-941 / -<br>2287-2297 / +                                                  | gatCACGCtcc<br>tagCACGCtgc<br>attCACGCtcc                                              |
| Scsalpha  | -2.38       | 2500 bp                                | ND***                                                                                        |                                                                                        |
| CG11963   | -1.89       | 2500 bp                                | 494-504 / -                                                                                  | cacCACGCccc                                                                            |
| SdhB      | -2.78       | 2500 bp                                | 1259-1269 / -<br>2176-2186 / -<br>2255-2265 / -<br>2354-2364 / +                             | cagCACGCcgc<br>tccCACGCggc<br>cacCACGCccc<br>aagCACGCgaa                               |
| CG10219   | -1.59       | 2500 bp                                | 550-560 / +<br>1307-1317 / -<br>1439-1449 / -                                                | ttgCACGCtac<br>cggCACGCtga<br>cgtCACGCtcc                                              |
| CG6666    | -2.33       | 2500 bp                                | 84-94 / +<br>996-1006 / +<br>1565-1575 / +                                                   | tctCACGCgac<br>gggCACGCtgt<br>tgcCACGCgct                                              |
| l(1)G0255 | -2.63       | 3652 bp                                | 1048-1058 / -<br>3167-3177 / +<br>3374-3384 / -                                              | cgcCACGCtac<br>gagCACGCctc<br>ctcCACGCgaa                                              |

|         |       |         |                                             |                                           |
|---------|-------|---------|---------------------------------------------|-------------------------------------------|
| CG6140  | -1.75 | 2500 bp | 816-826 / +                                 | ataCACGCgat                               |
| CG4095  | -2.70 | 2500 bp | 85-95 / -<br>999-1009 / -                   | ctcCACGCgaa<br>tggCACGCgac                |
| CG5214  | -2.63 | 2500 bp | 1148-1158 / +                               | gaaCACGCgca                               |
| Sucb    | NS**  | 2500 bp | ND                                          |                                           |
| CG10748 | NS    | 2500 bp | ND                                          |                                           |
| CG10749 | NS    | 2500 bp | ND                                          |                                           |
| CG14740 | NS    | 2500 bp | ND                                          |                                           |
| CG4706  | NS    | 2500 bp | ND                                          |                                           |
| CG5718  | NS    | 2500 bp | 514-528 / +<br>589-603 / -<br>1192-1206 / + | gatCACGCgcc<br>tgaCACGCggc<br>aaaCACGCgag |
| CG5599  | NS    | 2500 bp | ND                                          |                                           |
| CG6629  | 1.76  | 2500 bp | ND                                          |                                           |

**Note:** \* *cis*-regulatory region includes 2000bp upstream of the first transcription start site and 500bp downstream of the last transcription start site. \*\* NS: Not Significant; \*\*\*ND: Not Detected
