# Supplementary material for: Mechanisms Underlying Hypoxia Tolerance in Drosophila melanogaster: hairy as a Metabolic Switch
Source: PLoS Genet. 2008 Oct 17;4(10):e1000221. doi: 10.1371/journal.pgen.1000221 (PMC2556400; doi:10.1371/journal.pgen.1000221)
Supplement: Table S7 — Comparison of the TPI Genomic Locus between NF and AF with Multiple Sequence Alignment. (0.06 MB PDF) [file pgen.1000221.s008.pdf]

**Table S7.** Comparison of the TPI Genomic Locus between NF and AF with Multiple Sequence Alignment

**Note:**

ATGC: non-coding region  
**ATGC:** 5'-untranslated region (5'-UTR)  
**ATGC:** coding region/Open Reading Frame (ORF)  
**ATGC:** 3'-untranslated region (3'-UTR)  
**ATGC:** Polymorphism  
**#:**  $p < 0.0001$  (CHI-Test)

|                          |                                                              |     |
|--------------------------|--------------------------------------------------------------|-----|
| NF-8                     | ATTTTGGCAAGCCTGTTGATAAAAGCTTTTCCAGAGCTTTTGGGAAGCGACGCCAAAAC  | 60  |
| NF-6                     | ATTTTGGCAAGCCTGTTGATAAAAGCTTTTCCAGAGCTTTTGGGAAGCGACGCCAAAAC  | 60  |
| NF-9                     | ATTTTGGCAAGCCTGTTGATAAAAGCTTTTCCAGAGCTTTTGGGAAGCGACGCCAAAAC  | 60  |
| NF-7                     | ATTTTGGCAAGCCTGTTGATAAAAGCTTTTCCAGAGCTTTTGGGAAGCGACGCCAAAAC  | 60  |
| NF-1                     | ATTTTGGCAAGCCTGTTGATAAAAGCTTTTCCAGAGCTTTTGGGAAGCGACGCCAAAAC  | 60  |
| NF-5                     | ATTTTGGCAAGCCTGTTGATAAAAGCTTTTCCAGAGCTTTTGGGAAGCGACGCCAAAAC  | 60  |
| NF-4                     | ATTTTGGCAAGCCTGTTGATAAAAGCTTTTCCAGAGCTTTTGGGAAGCGACGCCAAAAC  | 60  |
| NF-2                     | ATTTTGGCAAGCCTGTTGATAAAAGCTTTTCCAGAGCTTTTGGGAAGCGACGCCAAAAC  | 60  |
| AF-1                     | ATTTTGGCAAGCCTGTTGATAAAAGCTTTTCCAGAGCTTTTGGGAAGCGACGCCAAAAC  | 60  |
| AF-3                     | ATTTTGGCAAGCCTGTTGATAAAAGCTTTTCCAGAGCTTTTGGGAAGCGACGCCAAAAC  | 60  |
| AF-9                     | ATTTTGGCAAGCCTGTTGATAAAAGCTTTTCCAGAGCTTTTGGGAAGCGACGCCAAAAC  | 60  |
| AF-8                     | ATTTTGGCAAGCCTGTTGATAAAAGCTTTTCCAGAGCTTTTGGGAAGCGACGCCAAAAC  | 60  |
| AF-6                     | ATTTTGGCAAGCCTGTTGATAAAAGCTTTTCCAGAGCTTTTGGGAAGCGACGCCAAAAC  | 60  |
| AF-2                     | ATTTTGGCAAGCCTGTTGATAAAAGCTTTTCCAGAGCTTTTGGGAAGCGACGCCAAAAC  | 60  |
| AF-10                    | ATTTTGGCAAGCCTGTTGATAAAAGCTTTTCCAGAGCTTTTGGGAAGCGACGCCAAAAC  | 60  |
| AF-7                     | ATTTTGGCAAGCCTGTTGATAAAAGCTTTTCCAGAGCTTTTGGGAAGCGACGCCAAAAC  | 60  |
| AF-5                     | ATTTTGGCAAGCCTGTTGATAAAAGCTTTTCCAGAGCTTTTGGGAAGCGACGCCAAAAC  | 60  |
| AF-4                     | ATTTTGGCAAGCCTGTTGATAAAAGCTTTTCCAGAGCTTTTGGGAAGCGACGCCAAAAC  | 60  |
| NF-10                    | ATTTTGGCAAGCCTGTTGATAAAAGCTTTTCCAGAGCTTTTGGGAAGCGACGCCAAAAC  | 60  |
| NF-3                     | ATTTTGGCAAGCCTGTTGATAAAAGCTTTTCCAGAGCTTTTGGGAAGCGACGCCAAAAC  | 60  |
| *****                    |                                                              |     |
|                          | # ##### # #                                                  |     |
| NF-8                     | GTTGGAGCTCACTTGCTCAAAGTTCCCCATCAAAAGGTTGGAGTCGCTGCTAAATCTAAA | 120 |
| NF-6                     | GTTGGAGCTCACTTGCTCAAAGTTCCCCATCAAAAGGTTGGAGTCGCTGCTAAATCTAAA | 120 |
| NF-9                     | GTTGGAGCTCACTTGCTCAAAGTTCCCCATCAAAAGGTTGGAGTCGCTGCTAAATCTAAA | 120 |
| NF-7                     | GTTGGAGCTCACTTGCTCAAAGTTCCCCATCAAAAGGTTGGAGTCGCTGCTAAATCTAAA | 120 |
| NF-1                     | GTTGGAGCTCACTTGCTCAAAGTTCCCCATCAAAAGGTTGGAGTCGCTGCTAAATCTAAA | 120 |
| NF-5                     | GTTGGAGCTCACTTGCTCAAAGTTCCCCATCAAAAGGTTGGAGTCGCTGCTAAATCTAAA | 120 |
| NF-4                     | GTTGGAGCTCACTTGCTCAAAGTTCCCCATCAAAAGGTTGGAGTCGCTGCTAAATCTAAA | 120 |
| NF-2                     | GTTGGAGCTCACTTGCTCAAAGTTCCCCATCAAAAGGTTGGAGTCGCTGCTAAATCTAAA | 120 |
| AF-1                     | GTTGGAGCTCACTTGCTCAAAGTTCCCCATCAGATGGTTGGAGTCACTGCTAAATCTAAA | 120 |
| AF-3                     | GTTGGAGCCCA-----AGTTCCCCATCAGATGGTTGGAGTCACTGCTAAATCTAAA     | 111 |
| AF-9                     | GTTGGAGCCCA-----AGTTCCCCATCAGATGGTTGGAGTCACTGCTAAATCTAAA     | 111 |
| AF-8                     | GTTGGAGCCCA-----AGTTCCCCATCAGATGGTTGGAGTCACTGCTAAATCTAAA     | 111 |
| AF-6                     | GTTGGAGCCCA-----AGTTCCCCATCAGATGGTTGGAGTCACTGCTAAATCTAAA     | 111 |
| AF-2                     | GTTGGAGCCCA-----AGTTCCCCATCAGATGGTTGGAGTCACTGCTAAATCTAAA     | 111 |
| AF-10                    | GTTGGAGCCCA-----AGTTCCCCATCAGATGGTTGGAGTCACTGCTAAATCTAAA     | 111 |
| AF-7                     | GTTGGAGCCCA-----AGTTCCCCATCAGATGGTTGGAGTCACTGCTAAATCTAAA     | 111 |
| AF-5                     | GTTGGAGCCCA-----AGTTCCCCATCAGATGGTTGGAGTCACTGCTAAATCTAAA     | 111 |
| AF-4                     | GTTGGAGCCCA-----AGTTCCCCATCAGATGGTTGGAGTCACTGCTAAATCTAAA     | 111 |
| NF-10                    | GTTGGAGCCCA-----AGTTCCCCATCAGATGGTTGGAGTCACTGCTAAATCTAAA     | 111 |
| NF-3                     | GTTGGAGCCCA-----AGTTCCCCATCAGATGGTTGGAGTCACTGCTAAATCTAAA     | 111 |
| ***** ** ***** * * ***** |                                                              |     |



|       |                                                              |     |
|-------|--------------------------------------------------------------|-----|
| AF-10 | ATCTGAACAGGAACGGTATCCAGTGCATTGCATCAGTAACGCTTCTCCAGCGATTCCCGT | 291 |
| AF-7  | ATCTGAACAGGAACGGTATCCAGTGCATTGCATCAGTAACGCTTCTCCAGCGATTCCCGT | 291 |
| AF-5  | ATCTGAACAGGAACGGTATCCAGTGCATTGCATCAGTAACGCTTCTCCAGCGATTCCCGT | 291 |
| AF-4  | ATCTGAACAGGAACGGTATCCAGTGCATTGCATCAGTAACGCTTCTCCAGCGATTCCCGT | 291 |
| NF-10 | ATCTGAACAGGAACGGTATCCAGTGCATTGCATCAGTAACGCTTCTCCAGCGATTCCCGT | 291 |
| NF-3  | ATCTGAACAGGAACGGTATCCAGTGCATTGCATCAGTAACGCTTCTCCAGCGATTCCCGT | 291 |

\*\*\*\*\*

|       |                                                              |     |
|-------|--------------------------------------------------------------|-----|
| NF-8  | ATCATCGGAACCACCACACCATCCCCACCATGGACCAGAACCGACCCACTGTGGGTGGTG | 360 |
| NF-6  | ATCATCGGAACCACCACACCATCCCCACCATGGACCAGAACCGACCCACTGTGGGTGGTG | 360 |
| NF-9  | ATCATCGGAACCACCACACCATCCCCACCATGGACCAGAACCGACCCACTGTGGGTGGTG | 360 |
| NF-7  | ATCATCGGAACCACCACACCATCCCCACCATGGACCAGAACCGACCCACTGTGGGTGGTG | 360 |
| NF-1  | ATCATCGGAACCACCACACCATCCCCACCATGGACCAGAACCGACCCACTGTGGGTGGTG | 360 |
| NF-5  | ATCATCGGAACCACCACACCATCCCCACCATGGACCAGAACCGACCCACTGTGGGTGGTG | 360 |
| NF-4  | ATCATCGGAACCACCACACCATCCCCACCATGGACCAGAACCGACCCACTGTGGGTGGTG | 360 |
| NF-2  | ATCATCGGAACCACCACACCATCCCCACCATGGACCAGAACCGACCCACTGTGGGTGGTG | 360 |
| AF-1  | ATCATCGGAACCACCACACCATCCCCACCATGGACCAGAACCGACCCACTGTGGGTGGTG | 360 |
| AF-3  | ATCATCGGAACCACCACACCATCCCCACCATGGACCAGAACCGACCCACTGTGGGTGGTG | 351 |
| AF-9  | ATCATCGGAACCACCACACCATCCCCACCATGGACCAGAACCGACCCACTGTGGGTGGTG | 351 |
| AF-8  | ATCATCGGAACCACCACACCATCCCCACCATGGACCAGAACCGACCCACTGTGGGTGGTG | 351 |
| AF-6  | ATCATCGGAACCACCACACCATCCCCACCATGGACCAGAACCGACCCACTGTGGGTGGTG | 351 |
| AF-2  | ATCATCGGAACCACCACACCATCCCCACCATGGACCAGAACCGACCCACTGTGGGTGGTG | 351 |
| AF-10 | ATCATCGGAACCACCACACCATCCCCACCATGGACCAGAACCGACCCACTGTGGGTGGTG | 351 |
| AF-7  | ATCATCGGAACCACCACACCATCCCCACCATGGACCAGAACCGACCCACTGTGGGTGGTG | 351 |
| AF-5  | ATCATCGGAACCACCACACCATCCCCACCATGGACCAGAACCGACCCACTGTGGGTGGTG | 351 |
| AF-4  | ATCATCGGAACCACCACACCATCCCCACCATGGACCAGAACCGACCCACTGTGGGTGGTG | 351 |
| NF-10 | ATCATCGGAACCACCACACCATCCCCACCATGGACCAGAACCGACCCACTGTGGGTGGTG | 351 |
| NF-3  | ATCATCGGAACCACCACACCATCCCCACCATGGACCAGAACCGACCCACTGTGGGTGGTG | 351 |

\*\*\*\*\*

|       |                                                              |     |
|-------|--------------------------------------------------------------|-----|
| NF-8  | TTACGGCGGAGGTACTAAAAGCCGTCGTTTCGGAAGCTCTGCTGGGCAAATTCACAGCTG | 420 |
| NF-6  | TTACGGCGGAGGTACTAAAAGCCGTCGTTTCGGAAGCTCTGCTGGGCAAATTCACAGCTG | 420 |
| NF-9  | TTACGGCGGAGGTACTAAAAGCCGTCGTTTCGGAAGCTCTGCTGGGCAAATTCACAGCTG | 420 |
| NF-7  | TTACGGCGGAGGTACTAAAAGCCGTCGTTTCGGAAGCTCTGCTGGGCAAATTCACAGCTG | 420 |
| NF-1  | TTACGGCGGAGGTACTAAAAGCCGTCGTTTCGGAAGCTCTGCTGGGCAAATTCACAGCTG | 420 |
| NF-5  | TTACGGCGGAGGTACTAAAAGCCGTCGTTTCGGAAGCTCTGCTGGGCAAATTCACAGCTG | 420 |
| NF-4  | TTACGGCGGAGGTACTAAAAGCCGTCGTTTCGGAAGCTCTGCTGGGCAAATTCACAGCTG | 420 |
| NF-2  | TTACGGCGGAGGTACTAAAAGCCGTCGTTTCGGAAGCTCTGCTGGGCAAATTCACAGCTG | 420 |
| AF-1  | TTACGGCGGAGGTACTAAAAGCCGTCGTTTCGGAAGCTCTGCTGGGCAAATTCACAGCTG | 420 |
| AF-3  | TTACGGCGGAGGTACTAAAAGCCGTCGTTTCGGAAGCTCTGCTGGGCAAATTCACAGCTG | 411 |
| AF-9  | TTACGGCGGAGGTACTAAAAGCCGTCGTTTCGGAAGCTCTGCTGGGCAAATTCACAGCTG | 411 |
| AF-8  | TTACGGCGGAGGTACTAAAAGCCGTCGTTTCGGAAGCTCTGCTGGGCAAATTCACAGCTG | 411 |
| AF-6  | TTACGGCGGAGGTACTAAAAGCCGTCGTTTCGGAAGCTCTGCTGGGCAAATTCACAGCTG | 411 |
| AF-2  | TTACGGCGGAGGTACTAAAAGCCGTCGTTTCGGAAGCTCTGCTGGGCAAATTCACAGCTG | 411 |
| AF-10 | TTACGGCGGAGGTACTAAAAGCCGTCGTTTCGGAAGCTCTGCTGGGCAAATTCACAGCTG | 411 |
| AF-7  | TTACGGCGGAGGTACTAAAAGCCGTCGTTTCGGAAGCTCTGCTGGGCAAATTCACAGCTG | 411 |
| AF-5  | TTACGGCGGAGGTACTAAAAGCCGTCGTTTCGGAAGCTCTGCTGGGCAAATTCACAGCTG | 411 |
| AF-4  | TTACGGCGGAGGTACTAAAAGCCGTCGTTTCGGAAGCTCTGCTGGGCAAATTCACAGCTG | 411 |
| NF-10 | TTACGGCGGAGGTACTAAAAGCCGTCGTTTCGGAAGCTCTGCTGGGCAAATTCACAGCTG | 411 |
| NF-3  | TTACGGCGGAGGTACTAAAAGCCGTCGTTTCGGAAGCTCTGCTGGGCAAATTCACAGCTG | 411 |

\*\*\*\*\*

|      |                                                             |     |
|------|-------------------------------------------------------------|-----|
| NF-8 | TTTTCCCAAAGCTTTTCAAGTGCCAGTGGAAGACTTACGAAGGTCAAAGAAGGTTAGTA | 480 |
| NF-6 | TTTTCCCAAAGCTTTTCAAGTGCCAGTGGAAGACTTACGAAGGTCAAAGAAGGTTAGTA | 480 |
| NF-9 | TTTTCCCAAAGCTTTTCAAGTGCCAGTGGAAGACTTACGAAGGTCAAAGAAGGTTAGTA | 480 |
| NF-7 | TTTTCCCAAAGCTTTTCAAGTGCCAGTGGAAGACTTACGAAGGTCAAAGAAGGTTAGTA | 480 |
| NF-1 | TTTTCCCAAAGCTTTTCAAGTGCCAGTGGAAGACTTACGAAGGTCAAAGAAGGTTAGTA | 480 |
| NF-5 | TTTTCCCAAAGCTTTTCAAGTGCCAGTGGAAGACTTACGAAGGTCAAAGAAGGTTAGTA | 480 |
| NF-4 | TTTTCCCAAAGCTTTTCAAGTGCCAGTGGAAGACTTACGAAGGTCAAAGAAGGTTAGTA | 480 |

|       |                                                              |     |
|-------|--------------------------------------------------------------|-----|
| NF-2  | TTTTCCCAAAGCTTTTCAAGTGCCAGTGGAAAGACTTACGAAGGTCAAAGAAGGTTAGTA | 480 |
| AF-1  | TTTTCCCAAAGCTTTTCAAGTGCCAGTGGAAAGACTTACGAAGGTCAAAGAAGGTTAGTA | 480 |
| AF-3  | TTTTCCCAAAGCTTTTCAAGTGCCAGTGGAAAGACTTACGAAGGTCAAAGAAGGTTAGTA | 471 |
| AF-9  | TTTTCCCAAAGCTTTTCAAGTGCCAGTGGAAAGACTTACGAAGGTCAAAGAAGGTTAGTA | 471 |
| AF-8  | TTTTCCCAAAGCTTTTCAAGTGCCAGTGGAAAGACTTACGAAGGTCAAAGAAGGTTAGTA | 471 |
| AF-6  | TTTTCCCAAAGCTTTTCAAGTGCCAGTGGAAAGACTTACGAAGGTCAAAGAAGGTTAGTA | 471 |
| AF-2  | TTTTCCCAAAGCTTTTCAAGTGCCAGTGGAAAGACTTACGAAGGTCAAAGAAGGTTAGTA | 471 |
| AF-10 | TTTTCCCAAAGCTTTTCAAGTGCCAGTGGAAAGACTTACGAAGGTCAAAGAAGGTTAGTA | 471 |
| AF-7  | TTTTCCCAAAGCTTTTCAAGTGCCAGTGGAAAGACTTACGAAGGTCAAAGAAGGTTAGTA | 471 |
| AF-5  | TTTTCCCAAAGCTTTTCAAGTGCCAGTGGAAAGACTTACGAAGGTCAAAGAAGGTTAGTA | 471 |
| AF-4  | TTTTCCCAAAGCTTTTCAAGTGCCAGTGGAAAGACTTACGAAGGTCAAAGAAGGTTAGTA | 471 |
| NF-10 | TTTTCCCAAAGCTTTTCAAGTGCCAGTGGAAAGACTTACGAAGGTCAAAGAAGGTTAGTA | 471 |
| NF-3  | TTTTCCCAAAGCTTTTCAAGTGCCAGTGGAAAGACTTACGAAGGTCAAAGAAGGTTAGTA | 471 |
|       | *****                                                        |     |

|       |                                                               |     |
|-------|---------------------------------------------------------------|-----|
| NF-8  | GGAAAAATCTGAGTGGAAAAAGTCGACGGCGAGCCTCCAGTCATCGAGTTACCCACTTGAA | 600 |
| NF-6  | GGAAAAATCTGAGTGGAAAAAGTCGACGGCGAGCCTCCAGTCATCGAGTTACCCACTTGAA | 600 |
| NF-9  | GGAAAAATCTGAGTGGAAAAAGTCGACGGCGAGCCTCCAGTCATCGAGTTACCCACTTGAA | 600 |
| NF-7  | GGAAAAATCTGAGTGGAAAAAGTCGACGGCGAGCCTCCAGTCATCGAGTTACCCACTTGAA | 600 |
| NF-1  | GGAAAAATCTGAGTGGAAAAAGTCGACGGCGAGCCTCCAGTCATCGAGTTACCCACTTGAA | 600 |
| NF-5  | GGAAAAATCTGAGTGGAAAAAGTCGACGGCGAGCCTCCAGTCATCGAGTTACCCACTTGAA | 600 |
| NF-4  | GGAAAAATCTGAGTGGAAAAAGTCGACGGCGAGCCTCCAGTCATCGAGTTACCCACTTGAA | 600 |
| NF-2  | GGAAAAATCTGAGTGGAAAAAGTCGACGGCGAGCCTCCAGTCATCGAGTTACCCACTTGAA | 600 |
| AF-1  | GGAAAAATCTGAGTGGAAAAAGTCGACGGCGAGCCTCCAGTCATCGAGTTACCCACTTGAA | 600 |
| AF-3  | GGAAAAATCTGAGTGGAAAAAGTCGACGGCGAGCCTCCAGTCATCGAGTTACCCACTTGAA | 591 |
| AF-9  | GGAAAAATCTGAGTGGAAAAAGTCGACGGCGAGCCTCCAGTCATCGAGTTACCCACTTGAA | 591 |
| AF-8  | GGAAAAATCTGAGTGGAAAAAGTCGACGGCGAGCCTCCAGTCATCGAGTTACCCACTTGAA | 591 |
| AF-6  | GGAAAAATCTGAGTGGAAAAAGTCGACGGCGAGCCTCCAGTCATCGAGTTACCCACTTGAA | 591 |
| AF-2  | GGAAAAATCTGAGTGGAAAAAGTCGACGGCGAGCCTCCAGTCATCGAGTTACCCACTTGAA | 591 |
| AF-10 | GGAAAAATCTGAGTGGAAAAAGTCGACGGCGAGCCTCCAGTCATCGAGTTACCCACTTGAA | 591 |
| AF-7  | GGAAAAATCTGAGTGGAAAAAGTCGACGGCGAGCCTCCAGTCATCGAGTTACCCACTTGAA | 591 |
| AF-5  | GGAAAAATCTGAGTGGAAAAAGTCGACGGCGAGCCTCCAGTCATCGAGTTACCCACTTGAA | 591 |
| AF-4  | GGAAAAATCTGAGTGGAAAAAGTCGACGGCGAGCCTCCAGTCATCGAGTTACCCACTTGAA | 591 |
| NF-10 | GGAAAAATCTGAGTGGAAAAAGTCGACGGCGAGCCTCCAGTCATCGAGTTACCCACTTGAA | 591 |
| NF-3  | GGAAAAATCTGAGTGGAAAAAGTCGACGGCGAGCCTCCAGTCATCGAGTTACCCACTTGAA | 591 |
|       | *****                                                         | *** |



AF-7 TGC GTGGGAGGCAACTGGAAGATGAACGGCGACCAGAAGTCCATCGCCGAGATCGCCAAG 771  
AF-5 TGC GTGGGAGGCAACTGGAAGATGAACGGCGACCAGAAGTCCATCGCCGAGATCGCCAAG 771  
AF-4 TGC GTGGGAGGCAACTGGAAGATGAACGGCGACCAGAAGTCCATCGCCGAGATCGCCAAG 771  
NF-10 TGC GTGGGAGGCAACTGGAAGATGAACGGCGACCAGAAGTCCATCGCCGAGATCGCCAAG 771  
NF-3 TGC GTGGGAGGCAACTGGAAGATGAACGGCGACCAGAAGTCCATCGCCGAGATCGCCAAG 771  
\*\*\*\*\*

NF-8 ACCCTGAGCTCGGCCGCCCTCGACCCCAACACGGAGGTGGTCATCGGCTGCCCGGCCATC 840  
NF-6 ACCCTGAGCTCGGCCGCCCTCGACCCCAACACGGAGGTGGTCATCGGCTGCCCGGCCATC 840  
NF-9 ACCCTGAGCTCGGCCGCCCTCGACCCCAACACGGAGGTGGTCATCGGCTGCCCGGCCATC 840  
NF-7 ACCCTGAGCTCGGCCGCCCTCGACCCCAACACGGAGGTGGTCATCGGCTGCCCGGCCATC 840  
NF-1 ACCCTGAGCTCGGCCGCCCTCGACCCCAACACGGAGGTGGTCATCGGCTGCCCGGCCATC 840  
NF-5 ACCCTGAGCTCGGCCGCCCTCGACCCCAACACGGAGGTGGTCATCGGCTGCCCGGCCATC 840  
NF-4 ACCCTGAGCTCGGCCGCCCTCGACCCCAACACGGAGGTGGTCATCGGCTGCCCGGCCATC 840  
NF-2 ACCCTGAGCTCGGCCGCCCTCGACCCCAACACGGAGGTGGTCATCGGCTGCCCGGCCATC 840  
AF-1 ACCCTGAGCTCGGCCGCCCTCGACCCCAACACGGAGGTGGTCATCGGCTGCCCGGCCATC 840  
AF-3 ACCCTGAGCTCGGCCGCCCTCGACCCCAACACGGAGGTGGTCATCGGCTGCCCGGCCATC 831  
AF-9 ACCCTGAGCTCGGCCGCCCTCGACCCCAACACGGAGGTGGTCATCGGCTGCCCGGCCATC 831  
AF-8 ACCCTGAGCTCGGCCGCCCTCGACCCCAACACGGAGGTGGTCATCGGCTGCCCGGCCATC 831  
AF-6 ACCCTGAGCTCGGCCGCCCTCGACCCCAACACGGAGGTGGTCATCGGCTGCCCGGCCATC 831  
AF-2 ACCCTGAGCTCGGCCGCCCTCGACCCCAACACGGAGGTGGTCATCGGCTGCCCGGCCATC 831  
AF-10 ACCCTGAGCTCGGCCGCCCTCGACCCCAACACGGAGGTGGTCATCGGCTGCCCGGCCATC 831  
AF-7 ACCCTGAGCTCGGCCGCCCTCGACCCCAACACGGAGGTGGTCATCGGCTGCCCGGCCATC 831  
AF-5 ACCCTGAGCTCGGCCGCCCTCGACCCCAACACGGAGGTGGTCATCGGCTGCCCGGCCATC 831  
AF-4 ACCCTGAGCTCGGCCGCCCTCGACCCCAACACGGAGGTGGTCATCGGCTGCCCGGCCATC 831  
NF-10 ACCCTGAGCTCGGCCGCCCTCGACCCCAACACGGAGGTGGTCATCGGCTGCCCGGCCATC 831  
NF-3 ACCCTGAGCTCGGCCGCCCTCGACCCCAACACGGAGGTGGTCATCGGCTGCCCGGCCATC 831  
\*\*\*\*\*

NF-8 TACCTGATGTACGCCCGCAACCTGCTGCCCTGCGAGCTGGGTCTGGCCGCGCCAGAATGCC 900  
NF-6 TACCTGATGTACGCCCGCAACCTGCTGCCCTGCGAGCTGGGTCTGGCCGACCAAGAATGCC 900  
NF-9 TACCTGATGTACGCCCGCAACCTGCTGCCCTGCGAGCTGGGTCTGGCCGCGCCAGAATGCC 900  
NF-7 TACCTGATGTACGCCCGCAACCTGCTGCCCTGCGAGCTGGGTCTGGCCGCGCCAGAATGCC 900  
NF-1 TACCTGATGTACGCCCGCAACCTGCTGCCCTGCGAGCTGGGTCTGGCCGCGCCAGAATGCC 900  
NF-5 TACCTGATGTACGCCCGCAACCTGCTGCCCTGCGAGCTGGGTCTGGCCGCGCCAGAATGCC 900  
NF-4 TACCTGATGTACGCCCGCAACCTGCTGCCCTGCGAGCTGGGTCTGGCCGCGCCAGAATGCC 900  
NF-2 TACCTGATGTACGCCCGCAACCTGCTGCCCTGCGAGCTGGGTCTGGCCGCGCCAGAATGCC 900  
AF-1 TACCTGATGTACGCCCGCAACCTGCTGCCCTGCGAGCTGGGTCTGGCCGCGCCAGAATGCC 900  
AF-3 TACCTGATGTACGCCCGCAACCTGCTGCCCTGCGAGCTGGGTCTGGCCGCGCCAGAATGCC 891  
AF-9 TACCTGATGTACGCCCGCAACCTGCTGCCCTGCGAGCTGGGTCTGGCCGCGCCAGAATGCC 891  
AF-8 TACCTGATGTACGCCCGCAACCTGCTGCCCTGCGAGCTGGGTCTGGCCGCGCCAGAATGCC 891  
AF-6 TACCTGATGTACGCCCGCAACCTGCTGCCCTGCGAGCTGGGTCTGGCCGCGCCAGAATGCC 891  
AF-2 TACCTGATGTACGCCCGCAACCTGCTGCCCTGCGAGCTGGGTCTGGCCGCGCCAGAATGCC 891  
AF-10 TACCTGATGTACGCCCGCAACCTGCTGCCCTGCGAGCTGGGTCTGGCCGCGCCAGAATGCC 891  
AF-7 TACCTGATGTACGCCCGCAACCTGCTGCCCTGCGAGCTGGGTCTGGCCGCGCCAGAATGCC 891  
AF-5 TACCTGATGTACGCCCGCAACCTGCTGCCCTGCGAGCTGGGTCTGGCCGCGCCAGAATGCC 891  
AF-4 TACCTGATGTACGCCCGCAACCTGCTGCCCTGCGAGCTGGGTCTGGCCGCGCCAGAATGCC 891  
NF-10 TACCTGATGTACGCCCGCAACCTGCTGCCCTGCGAGCTGGGTCTGGCCGCGCCAGAATGCC 891  
NF-3 TACCTGATGTACGCCCGCAACCTGCTGCCCTGCGAGCTGGGTCTGGCCGCGCCAGAATGCC 891  
\*\*\*\*\*

NF-8 TACAAGGTGGCCAAGGGCGCATTACCGGCGAGATCTCGCCTGCGATGCTGAAGGACATC 960  
NF-6 TACAAGGTGGCCAAGGGCGCATTACCGGCGAGATCTCGCCTGCGATGCTGAAGGACATC 960  
NF-9 TACAAGGTGGCCAAGGGCGCATTACCGGCGAGATCTCGCCTGCGATGCTGAAGGACATC 960  
NF-7 TACAAGGTGGCCAAGGGCGCATTACCGGCGAGATCTCGCCTGCGATGCTGAAGGACATC 960  
NF-1 TACAAGGTGGCCAAGGGCGCATTACCGGCGAGATCTCGCCTGCGATGCTGAAGGACATC 960  
NF-5 TACAAGGTGGCCAAGGGCGCATTACCGGCGAGATCTCGCCTGCGATGCTGAAGGACATC 960  
NF-4 TACAAGGTGGCCAAGGGCGCATTACCGGCGAGATCTCGCCTGCGATGCTGAAGGACATC 960  
NF-2 TACAAGGTGGCCAAGGGCGCATTACCGGCGAGATCTCGCCTGCGATGCTGAAGGACATC 960

|       |                                                             |     |
|-------|-------------------------------------------------------------|-----|
| AF-1  | TACAAGGTGGCCAAGGGCGCATTACCGGCGAGATCTCGCCTGCGATGCTGAAGGACATC | 960 |
| AF-3  | TACAAGGTGGCCAAGGGCGCATTACCGGCGAGATCTCGCCTGCGATGCTGAAGGACATC | 951 |
| AF-9  | TACAAGGTGGCCAAGGGCGCATTACCGGCGAGATCTCGCCTGCGATGCTGAAGGACATC | 951 |
| AF-8  | TACGAGGTGGCCAAGGGCGCATTACCGGCGAGATCTCGCCTGCGATGCTGAAGGACATC | 951 |
| AF-6  | TACAAGGTGGCCAAGGGCGCATTACCGGCGAGATCTCGCCTGCGATGCTGAAGGACATC | 951 |
| AF-2  | TACAAGGTGGCCAAGGGCGCATTACCGGCGAGATCTCGCCTGCGATGCTGAAGGACATC | 951 |
| AF-10 | TACAAGGTGGCCAAGGGCGCATTACCGGCGAGATCTCGCCTGCGATGCTGAAGGACATC | 951 |
| AF-7  | TACAAGGTGGCCAAGGGCGCATTACCGGCGAGATCTCGCCTGCGATGCTGAAGGACATC | 951 |
| AF-5  | TACAAGGTGGCCAAGGGCGCATTACCGGCGAGATCTCGCCTGCGATGCTGAAGGACATC | 951 |
| AF-4  | TACAAGGTGGCCAAGGGCGCATTACCGGCGAGATCTCGCCTGCGATGCTGAAGGACATC | 951 |
| NF-10 | TACAAGGTGGCCAAGGGCGCATTACCGGCGAGATCTCGCCTGCGATGCTGAAGGACATC | 951 |
| NF-3  | TACAAGGTGGCCAAGGGCGCATTACCGGCGAGATCTCGCCTGCGATGCTGAAGGACATC | 951 |
|       | *** *****                                                   |     |

|       |                                                             |      |
|-------|-------------------------------------------------------------|------|
| NF-8  | GGCGCCGACTGGGTGATCCTGGGAACTCGGAGCGTCGCGCCATCTTCGGCGAATCGGAC | 1020 |
| NF-6  | GGCGCCGACTGGGTGATCCTGGGAACTCGGAGCGTCGCGCCATCTTCGGCGAATCGGAC | 1020 |
| NF-9  | GGCGCCGACTGGGTGATCCTGGGAACTCGGAGCGTCGCGCCATCTTCGGCGAATCGGAC | 1020 |
| NF-7  | GGCGCCGACTGGGTGATCCTGGGAACTCGGAGCGTCGCGCCATCTTCGGCGAATCGGAC | 1020 |
| NF-1  | GGCGCCGACTGGGTGATCCTGGGAACTCGGAGCGTCGCGCCATCTTCGGCGAATCGGAC | 1020 |
| NF-5  | GGCGCCGACTGGGTGATCCTGGGAACTCGGAGCGTCGCGCCATCTTCGGCGAATCGGAC | 1020 |
| NF-4  | GGCGCCGACTGGGTGATCCTGGGAACTCGGAGCGTCGCGCCATCTTCGGCGAATCGGAC | 1020 |
| NF-2  | GGCGCCGACTGGGTGATCCTGGGAACTCGGAGCGTCGCGCCATCTTCGGCGAATCGGAC | 1020 |
| AF-1  | GGCGCCGACTGGGTGATCCTGGGAACTCGGAGCGTCGCGCCATCTTCGGCGAATCGGAC | 1020 |
| AF-3  | GGCGCCGACTGGGTGATCCTGGGAACTCGGAGCGTCGCGCCATCTTCGGCGAATCGGAC | 1011 |
| AF-9  | GGCGCCGACTGGGTGATCCTGGGAACTCGGAGCGTCGCGCCATCTTCGGCGAATCGGAC | 1011 |
| AF-8  | GGCGCCGACTGGGTGATCCTGGGAACTCGGAGCGTCGCGCCATCTTCGGCGAATCGGAC | 1011 |
| AF-6  | GGCGCCGACTGGGTGATCCTGGGAACTCGGAGCGTCGCGCCATCTTCGGCGAATCGGAC | 1011 |
| AF-2  | GGCGCCGACTGGGTGATCCTGGGAACTCGGAGCGTCGCGCCATCTTCGGCGAATCGGAC | 1011 |
| AF-10 | GGCGCCGACTGGGTGATCCTGGGAACTCGGAGCGTCGCGCCATCTTCGGCGAATCGGAC | 1011 |
| AF-7  | GGCGCCGACTGGGTGATCCTGGGAACTCGGAGCGTCGCGCCATCTTCGGCGAATCGGAC | 1011 |
| AF-5  | GGCGCCGACTGGGTGATCCTGGGAACTCGGAGCGTCGCGCCATCTTCGGCGAATCGGAC | 1011 |
| AF-4  | GGCGCCGACTGGGTGATCCTGGGAACTCGGAGCGTCGCGCCATCTTCGGCGAATCGGAC | 1011 |
| NF-10 | GGCGCCGACTGGGTGATCCTGGGAACTCGGAGCGTCGCGCCATCTTCGGCGAATCGGAC | 1011 |
| NF-3  | GGCGCCGACTGGGTGATCCTGGGAACTCGGAGCGTCGCGCCATCTTCGGCGAATCGGAC | 1011 |
|       | *****                                                       |      |

|       |                                                              |      |
|-------|--------------------------------------------------------------|------|
| NF-8  | GCCCTGATCGCCGAGAAGGCCGAGCACGCCCTGGCCGAGGGCCTCAAGGTCATCGCCTGC | 1080 |
| NF-6  | GCCCTGATCGCCGAGAAGGCCGAGCACGCCCTGGCCGAGGGCCTCAAGGTCATCGCCTGC | 1080 |
| NF-9  | GCCCTGATCGCCGAGAAGGCCGAGCACGCCCTGGCCGAGGGCCTCAAGGTCATCGCCTGC | 1080 |
| NF-7  | GCCCTGATCGCCGAGAAGGCCGAGCACGCCCTGGCCGAGGGCCTCAAGGTCATCGCCTGC | 1080 |
| NF-1  | GCCCTGATCGCCGAGAAGGCCGAGCACGCCCTGGCCGAGGGCCTCAAGGTCATCGCCTGC | 1080 |
| NF-5  | GCCCTGATCGCCGAGAAGGCCGAGCACGCCCTGGCCGAGGGCCTCAAGGTCATCGCCTGC | 1080 |
| NF-4  | GCCCTGATCGCCGAGAAGGCCGAGCACGCCCTGGCCGAGGGCCTCAAGGTCATCGCCTGC | 1080 |
| NF-2  | GCCCTGATCGCCGAGAAGGCCGAGCACGCCCTGGCCGAGGGCCTCAAGGTCATCGCCTGC | 1080 |
| AF-1  | GCCCTGATCGCCGAGAAGGCCGAGCACGCCCTGGCCGAGGGCCTCAAGGTCATCGCCTGC | 1080 |
| AF-3  | GCCCTGATCGCCGAGAAGGCCGAGCACGCCCTGGCCGAGGGCCTGAAGGTCATCGCCTGC | 1071 |
| AF-9  | GCCCTGATCGCCGAGAAGGCCGAGCACGCCCTGGCCGAGGGCCTGAAGGTCATCGCCTGC | 1071 |
| AF-8  | GCCCTGATCGCCGAGAAGGCCGAGCACGCCCTGGCCGAGGGCCTGAAGGTCATCGCCTGC | 1071 |
| AF-6  | GCCCTGATCGCCGAGAAGGCCGAGCACGCCCTGGCCGAGGGCCTGAAGGTCATCGCCTGC | 1071 |
| AF-2  | GCCCTGATCGCCGAGAAGGCCGAGCACGCCCTGGCCGAGGGCCTCAAGGTCATCGCCTGC | 1071 |
| AF-10 | GCCCTGATCGCCGAGAAGGCCGAGCACGCCCTGGCCGAGGGCCTCAAGGTCATCGCCTGC | 1071 |
| AF-7  | GCCCTGATCGCCGAGAAGGCCGAGCACGCCCTGACCGAGGGCCTCAAGGTCATCGCCTGC | 1071 |
| AF-5  | GCCCTGATCGCCGAGAAGGCCGAGCACGCCCTGGCCGAGGGACTCAAGGTCATCGCCTGC | 1071 |
| AF-4  | GCCCTGATCGCCGAGAAGGCCGAGCACGCCCTGGCCGAGGGCCTCAAGGTCATCGCCTGC | 1071 |
| NF-10 | GCCCTGATCGCCGAGAAGGCCGAGCACGCCCTGGCCGAGGGCCTCAAGGTCATCGCCTGC | 1071 |
| NF-3  | GCCCTGATCGCCGAGAAGGCCGAGCACGCCCTGGCCGAGGGCCTCAAGGTCATCGCCTGC | 1071 |
|       | *****                                                        |      |

|      |                                                           |      |
|------|-----------------------------------------------------------|------|
| NF-8 | ATTGGTGAGACCCTGGAGGAGCGGAGGCCGCAAGACCAACGAGGTGGTGGCCGCCAA | 1140 |
|------|-----------------------------------------------------------|------|



|       |                                                        |        |      |
|-------|--------------------------------------------------------|--------|------|
| AF-7  | GTCTGGGCCATTGGCACCGGCAAGACCGCCACACCCGATCAGGTAAGGTCGCCC | TTAGCC | 1251 |
| AF-5  | GTCTGGGCCATTGGCACCGGCAAGACCGCCACACCCGATCAGGTAAGGTCGCCC | TTAGCC | 1251 |
| AF-4  | GTCTGGGCCATTGGCACCGGCAAGACCGCCACACCCGATCAGGTAAGGTCGCCC | TTAGCC | 1251 |
| NF-10 | GTCTGGGCCATTGGCACCGGCAAGACCGCCACACCCGATCAGGTAAGGTCGCCC | TTAGCC | 1251 |
| NF-3  | GTCTGGGCCATTGGCACCGGCAAGACCGCCACACCCGATCAGGTAAGGTCGCCC | TTAGCC | 1251 |

\*\*\*\*\*

|       |                                                  |              |      |
|-------|--------------------------------------------------|--------------|------|
| NF-8  | CAGAGACTAATCCCTTCCAGAACTGATATTTTCCCTTCCCAATTGCAG | GCTCAAGAGGTC | 1315 |
| NF-6  | CAGAGACTAATCCCTTCCAGAACTGATATTTTCCCTTCCCAATTGCAG | GCTCAAGAGGTC | 1315 |
| NF-9  | CAGAGACTAATCCCTTCCAGAACTGATATTTTCCCTTCCCAATTGCAG | GCTCAAGAGGTC | 1315 |
| NF-7  | CAGAGACTAATCCCTTCCAGAACTGATATTTTCCCTTCCCAATTGCAG | GCTCAAGAGGTC | 1315 |
| NF-1  | CAGAGACTAATCCCTTCCAGAACTGATATTTTCCCTTCCCAATTGCAG | GCTCAAGAGGTC | 1315 |
| NF-5  | CAGAGACTAATCCCTTCCAGAACTGATATTTTCCCTTCCCAATTGCAG | GCTCAAGAGGTC | 1315 |
| NF-4  | CAGAGACTAATCCCTTCCAGAACTGATATTTTCCCTTCCCAATTGCAG | GCTCAAGAGGTC | 1315 |
| NF-2  | CAGAGGCTAATCCCTTCCAGAACTGATATTTTCCCTTCCCAATTGCAG | GCTCAAGAGGTC | 1320 |
| AF-1  | CAGAGACTAATCCCTTCCAGAACTGATATTTTCCCTTCCCAATTGCAG | GCTCAAGAGGTC | 1315 |
| AF-3  | CAGAGACTAATCCCTTCCAGAACTGATATTTTCCCTTCCCAATTGCAG | GCTCAAGAGGTC | 1306 |
| AF-9  | CAGAGACTAATCCCTTCCAGAACTGATATTTTCCCTTCCCAATTGCAG | GCTCAAGAGGTC | 1306 |
| AF-8  | CAGAGACTAATCCCTTCCAGAACTGATATTTTCCCTTCCCAATTGCAG | GCTCAAGAGGTC | 1306 |
| AF-6  | CAGAGACTAATCCCTTCCAGAACTGATATTTTCCCTTCCCAATTGCAG | GCTCAAGAGGTC | 1306 |
| AF-2  | CAGAGGCTAATCCCTTCCAGAACTGATATTTTCCCTTCCCAATTGCAG | GCTCAAGAGGTC | 1311 |
| AF-10 | CAGAGGCTAATCCCTTCCAGAACTGATATTTTCCCTTCCCAATTGCAG | GCTCAAGAGGTC | 1311 |
| AF-7  | CAGAGGCTAATCCCTTCCAGAACTGATATTTTCCCTTCCCAATTGCAG | GCTCAAGAGGTC | 1311 |
| AF-5  | CAGAGGCTAATCCCTTCCAGAACTGATATTTTCCCTTCCCAATTGCAG | GCTCAAGAGGTC | 1311 |
| AF-4  | CAGAGGCTAATCCCTTCCAGAACTGATATTTTCCCTTCCCAATTGCAG | GCTCAAGAGGTC | 1311 |
| NF-10 | CAGAGGCTAATCCCTTCCAGAACTGATATTTTCCCTTCCCAATTGCAG | GCTCAAGAGGTC | 1311 |
| NF-3  | CAGAGGCTAATCCCTTCCAGAACTGATATTTTCCCTTCCCAATTGCAG | GCTCAAGAGGTC | 1311 |

\*\*\*\*\*

|       |                                                              |  |      |
|-------|--------------------------------------------------------------|--|------|
| NF-8  | CACGCCTTCCTGCGCCAGTGGCTGAGCGACAACATCTCCAAGGAGGTGTCCGCCAGCCTG |  | 1375 |
| NF-6  | CACGCCTTCCTGCGCCAGTGGCTGAGCGACAACATCTCCAAGGAGGTGTCCGCCAGCCTG |  | 1375 |
| NF-9  | CACGCCTTCCTGCGCCAGTGGCTGAGCGACAACATCTCCAAGGAGGTGTCCGCCAGCCTG |  | 1375 |
| NF-7  | CACGCCTTCCTGCGCCAGTGGCTGAGCGACAACATCTCCAAGGAGGTGTCCGCCAGCCTG |  | 1375 |
| NF-1  | CACGCCTTCCTGCGCCAGTGGCTGAGCGACAACATCTCCAAGGAGGTGTCCGCCAGCCTG |  | 1375 |
| NF-5  | CACGCCTTCCTGCGCCAGTGGCTGAGCGACAACATCTCCAAGGAGGTGTCCGCCAGCCTG |  | 1375 |
| NF-4  | CACGCCTTCCTGCGCCAGTGGCTGAGCGACAACATCTCCAAGGAGGTGTCCGCCAGCCTG |  | 1375 |
| NF-2  | CACGCCTTCCTGCGCCAGTGGCTGAGCGACAACATCTCCAAGGAGGTGTCCGCCAGCCTG |  | 1380 |
| AF-1  | CACGCCTTCCTGCGCCAGTGGCTGAGCGACAACATCTCCAAGGAGGTGTCCGCCAGCCTG |  | 1375 |
| AF-3  | CACGCCTTCCTGCGCCAGTGGCTGAGCGACAACATCTCCAAGGAGGTGTCCGCCAGCCTG |  | 1366 |
| AF-9  | CACGCCTTCCTGCGCCAGTGGCTGAGCGACAACATCTCCAAGGAGGTGTCCGCCAGCCTG |  | 1366 |
| AF-8  | CACGCCTTCCTGCGCCAGTGGCTGAGCGACAACATCTCCAAGGAGGTGTCCGCCAGCCTG |  | 1366 |
| AF-6  | CACGCCTTCCTGCGCCAGTGGCTGAGCGACAACATCTCCAAGGAGGTGTCCGCCAGCCTG |  | 1366 |
| AF-2  | CACGCCTTCCTGCGCCAGTGGCTGAGCGACAACATCTCCAAGGAGGTGTCCGCCAGCCTG |  | 1371 |
| AF-10 | CACGCCTTCCTGCGCCAGTGGCTGAGCGACAACATCTCCAAGGAGGTGTCCGCCAGCCTG |  | 1371 |
| AF-7  | CACGCCTTCCTGCGCCAGTGGCTGAGCGACAACATCTCCAAGGAGGTGTCCGCCAGCCTG |  | 1371 |
| AF-5  | CACGCCTTCCTGCGCCAGTGGCTGAGCGACAACATCTCCAAGGAGGTGTCCGCCAGCCTG |  | 1371 |
| AF-4  | CACGCCTTCCTGCGCCAGTGGCTGAGCGACAACATCTCCAAGGAGGTGTCCGCCAGCCTG |  | 1371 |
| NF-10 | CACGCCTTCCTGCGCCAGTGGCTGAGCGACAACATCTCCAAGGAGGTGTCCGCCAGCCTG |  | 1371 |
| NF-3  | CACGCCTTCCTGCGCCAGTGGCTGAGCGACAACATCTCCAAGGAGGTGTCCGCCAGCCTG |  | 1371 |

\*\*\*\*\*

|      |                                                              |  |      |
|------|--------------------------------------------------------------|--|------|
| NF-8 | CGCATCCAGTACGGTGGATCCGTGACCGCCGCCAACGCCAAGGAGCTGGCCAAGAAGCCC |  | 1435 |
| NF-6 | CGCATCCAGTACGGTGGATCCGTGACCGCCGCCAACGCCAAGGAGCTGGCCAAGAAGCCC |  | 1435 |
| NF-9 | CGCATCCAGTACGGTGGATCCGTGACCGCCGCCAACGCCAAGGAGCTGGCCAAGAAGCCC |  | 1435 |
| NF-7 | CGCATCCAGTACGGTGGATCCGTGACCGCCGCCAACGCCAAGGAGCTGGCCAAGAAGCCC |  | 1435 |
| NF-1 | CGCATCCAGTACGGTGGATCCGTGACCGCCGCCAACGCCAAGGAGCTGGCCAAGAAGCCC |  | 1435 |
| NF-5 | CGCATCCAGTACGGTGGATCCGTGACCGCCGCCAACGCCAAGGAGCTGGCCAAGAAGCCC |  | 1435 |
| NF-4 | CGCATCCAGTACGGTGGATCCGTGACCGCCGCCAACGCCAAGGAGCTGGCCAAGAAGCCC |  | 1435 |
| NF-2 | CGCATCCAGTACGGTGGATCCGTGACCGCCGCCAACGCCAAGGAGCTGGCCAAGAAGCCC |  | 1440 |

|       |                                                              |      |
|-------|--------------------------------------------------------------|------|
| AF-1  | CGCATCCAGTACGGTGGATCCGTGACCGCCGCCAACGCCAAGGAGCTGGCCAAGAAGCCC | 1435 |
| AF-3  | CGCATCCAGTACGGTGGATCCGTGACCGCCGCCAACGCCAAGGAGCTGGCCAAGAAGCCC | 1426 |
| AF-9  | CGCATCCAGTACGGTGGATCCGTGACCGCCGCCAACGCCAAGGAGCTGGCCAAGAAGCCC | 1426 |
| AF-8  | CGCATCCAGTACGGTGGATCCGTGACCGCCGCCAACGCCAAGGAGCTGGCCAAGAAGCCC | 1426 |
| AF-6  | CGCATCCAGTACGGTGGATCCGTGACCGCCGCCAACGCCAAGGAGCTGGCCAAGAAGCCC | 1426 |
| AF-2  | CGCATCCAGTACGGTGGATCCGTGACCGCCGCCAACGCCAAGGAGCTGGCCAAGAAGCCC | 1431 |
| AF-10 | CGCATCCAGTACGGTGGATCCGTGACCGCCGCCAACGCCAAGGAGCTGGCCAAGAAGCCC | 1431 |
| AF-7  | CGCATCCAGTACGGTGGATCCGTGACCGCCGCCAACGCCAAGGAGCTGGCCAAGAAGCCC | 1431 |
| AF-5  | CGCATCCAGTACGGTGGATCCGTGACCGCCGCCAACGCCAAGGAGCTGGCCAAGAAGCCC | 1431 |
| AF-4  | CGCATCCAGTACGGTGGATCCGTGACCGCCGCCAACGCCAAGGAGCTGGCCAAGAAGCCC | 1431 |
| NF-10 | CGCATCCAGTACGGTGGATCCGTGACCGCCGCCAACGCCAAGGAGCTGGCCAAGAAGCCC | 1431 |
| NF-3  | CGCATCCAGTACGGTGGATCCGTGACCGCCGCCAACGCCAAGGAGCTGGCCAAGAAGCCC | 1431 |

\*\*\*\*\*

|       |                                                              |      |
|-------|--------------------------------------------------------------|------|
| NF-8  | GACATCGATGGCTTCCTGGTCGGAGGCGCCTCCCTGAAGCCCGAGTTCGTGGACATCATC | 1495 |
| NF-6  | GACATCGATGGCTTCCTGGTCGGAGGCGCCTCCCTGAAGCCCGAGTTCGTGGACATCATC | 1495 |
| NF-9  | GACATCGATGGCTTCCTGGTCGGAGGCGCCTCCCTGAAGCCCGAGTTCGTGGACATCATC | 1495 |
| NF-7  | GACATCGATGGCTTCCTGGTCGGAGGCGCCTCCCTGAAGCCCGAGTTCGTGGACATCATC | 1495 |
| NF-1  | GACATCGATGGCTTCCTGGTCGGAGGCGCCTCCCTGAAGCCCGAGTTCGTGGACATCATC | 1495 |
| NF-5  | GACATCGATGGCTTCCTGGTCGGAGGCGCCTCCCTGAAGCCCGAGTTCGTGGACATCATC | 1495 |
| NF-4  | GACATCGATGGCTTCCTGGTCGGAGGCGCCTCCCTGAAGCCCGAGTTCGTGGACATCATC | 1495 |
| NF-2  | GACATCGATGGCTTCCTGGTCGGAGGCGCCTCCCTGAAGCCCGAGTTCGTGGACATCATC | 1500 |
| AF-1  | GACATCGATGGCTTCCTGGTCGGAGGCGCCTCCCTGAAGCCCGAGTTCGTGGACATCATC | 1495 |
| AF-3  | GACATCGATGGCTTCCTGGTCGGAGGCGCCTCCCTGAAGCCCGAGTTCGTGGACATCATC | 1486 |
| AF-9  | GACATCGATGGCTTCCTGGTCGGAGGCGCCTCCCTGAAGCCCGAGTTCGTGGACATCATC | 1486 |
| AF-8  | GACATCGATGGCTTCCTGGTCGGAGGCGCCTCCCTGAAGCCCGAGTTCGTGGACATCATC | 1486 |
| AF-6  | GACATCGATGGCTTCCTGGTCGGAGGCGCCTCCCTGAAGCCCGAGTTCGTGGACATCATC | 1486 |
| AF-2  | GACATCGATGGCTTCCTGGTCGGAGGCGCCTCCCTGAAGCCCGAGTTCGTGGACATCATC | 1491 |
| AF-10 | GACATCGATGGCTTCCTGGTCGGAGGCGCCTCCCTGAAGCCCGAGTTCGTGGACATCATC | 1491 |
| AF-7  | GACATCGATGGCTTCCTGGTCGGAGGCGCCTCCCTGAAGCCCGAGTTCGTGGACATCATC | 1491 |
| AF-5  | GACATCGATGGCTTCCTGGTCGGAGGCGCCTCCCTGAAGCCCGAGTTCGTGGACATCATC | 1491 |
| AF-4  | GACATCGATGGCTTCCTGGTCGGAGGCGCCTCCCTGAAGCCCGAGTTCGTGGACATCATC | 1491 |
| NF-10 | GACATCGATGGCTTCCTGGTCGGAGGCGCCTCCCTGAAGCCCGAGTTCGTGGACATCATC | 1491 |
| NF-3  | GACATCGATGGCTTCCTGGTCGGAGGCGCCTCCCTGAAGCCCGAGTTCGTGGACATCATC | 1491 |

\*\*\*\*\*

|       |                                                               |      |
|-------|---------------------------------------------------------------|------|
| NF-8  | AACGCCCGGCAGTAAGCAACGCGATCTCAAGCATCAGATCGCTTTTCGGCCAGCGAACTGC | 1555 |
| NF-6  | AACGCCCGGCAGTAAGCAACGCGATCTCAAGCATCAGATCGCTTTTCGGCCAGCGAACTGC | 1555 |
| NF-9  | AACGCCCGGCAGTAAGCAACGCGATCTCAAGCATCAGATCGCTTTTCGGCCAGCGAACTGC | 1555 |
| NF-7  | AACGCCCGGCAGTAAGCAACGCGATCTCAAGCATCAGATCGCTTTTCGGCCAGCGAACTGC | 1555 |
| NF-1  | AACGCCCGGCAGTAAGCAACGCGATCTCAAGCATCAGATCGCTTTTCGGCCAGCGAACTGC | 1555 |
| NF-5  | AACGCCCGGCAGTAAGCAACGCGATCTCAAGCATCAGATCGCTTTTCGGCCAGCGAACTGC | 1555 |
| NF-4  | AACGCCCGGCAGTAAGCAACGCGATCTCAAGCATCAGATCGCTTTTCGGCCAGCGAACTGC | 1555 |
| NF-2  | AACGCCCGGCAGTAAGCAACGCGATCTCAAGCATCAGATCGCTTTTCGGCCAGCGAACTGC | 1560 |
| AF-1  | AACGCCCGGCAGTAAGCAACGCGATCTCAAGCATCAGATCGCTTTTCGGCCAGCGAACTGC | 1555 |
| AF-3  | AACGCCCGGCAGTAAGCAACGCGATCTCAAGCATCAGATCGCTTTTCGGCCAGCGAACTGC | 1546 |
| AF-9  | AACGCCCGGCAGTAAGCAACGCGATCTCAAGCATCAGATCGCTTTTCGGCCAGCGAACTGC | 1546 |
| AF-8  | AACGCCCGGCAGTAAGCAACGCGATCTCAAGCATCAGATCGCTTTTCGGCCAGCGAACTGC | 1546 |
| AF-6  | AACGCCCGGCAGTAAGCAACGCGATCTCAAGCATCAGATCGCTTTTCGGCCAGCGAACTGC | 1546 |
| AF-2  | AACGCCCGGCAGTAAGCAACGCGATCTCAAGCATCAGATCGCTTTTCGGCCAGCGAACTGC | 1551 |
| AF-10 | AACGCCCGGCAGTAAGCAACGCGATCTCAAGCATCAGATCGCTTTTCGGCCAGCGAACTGC | 1551 |
| AF-7  | AACGCCCGGCAGTAAGCAACGCGATCTCAAGCATCAGATCGCTTTTCGGCCAGCGAACTGC | 1551 |
| AF-5  | AACGCCCGGCAGTAAGCAACGCGATCTCAAGCATCAGATCGCTTTTCGGCCAGCGAACTGC | 1551 |
| AF-4  | AACGCCCGGCAGTAAGCAACGCGATCTCAAGCATCAGATCGCTTTTCGGCCAGCGAACTGC | 1551 |
| NF-10 | AACGCCCGGCAGTAAGCAACGCGATCTCAAGCATCAGATCGCTTTTCGGCCAGCGAACTGC | 1551 |
| NF-3  | AACGCCCGGCAGTAAGCAACGCGATCTCAAGCATCAGATCGCTTTTCGGCCAGCGAACTGC | 1551 |

\*\*\*\*\*

|      |                                                            |      |
|------|------------------------------------------------------------|------|
| NF-8 | CCGCGAAGGAGCACTGGAGGGCAGGACTCCATACTCCTGCGCGGAATGCATTACGCAC | 1615 |
|------|------------------------------------------------------------|------|



|       |                                                              |      |
|-------|--------------------------------------------------------------|------|
| AF-7  | CTACTCACATCCTTGTTGTTGAACGTATAGTAGTCCATTGTGTAAATCTTAAATTATTCA | 1731 |
| AF-5  | CTACTCACATCCTTGTTGTTGAACGTATAGTAGTCCATTGTGTAAATCTTAAATTATTCA | 1731 |
| AF-4  | CTACTCACATCCTTGTTGTTGAACGTATAGTAGTCCATTGTGTAAATCTTAAATTATTCA | 1731 |
| NF-10 | CTACTCACATCCTTGTTGTTGAACGTATAGTAGTCCATTGTGTAAATCTTAAATTATTCA | 1731 |
| NF-3  | CTACTCACATCCTTGTTGTTGAACGTATAGTAGTCCATTGTGTAAATCTTAAATTATTCA | 1731 |
|       | *****                                                        |      |

|       |                                                            |      |
|-------|------------------------------------------------------------|------|
| NF-8  | GGCAATAATTATGCGCTACTCATTCTTATATACCAAACCAAACAGGTGTCTTATTTTT | 1795 |
| NF-6  | GGCAATAATTATGCGCTACTCATTCTTATATACCAAACCAAACAGGTGTCTTATTTTT | 1795 |
| NF-9  | GGCAATAATTATGCGCTACTCATTCTTATATACCAAACCAAACAGGTGTCTTATTTTT | 1795 |
| NF-7  | GGCAATAATTATGCGCTACTCATTCTTATATACCAAACCAAACAGGTGTCTTATTTTT | 1795 |
| NF-1  | GGCAATAATTATGCGCTACTCATTCTTATATACCAAACCAAACAGGTGTCTTATTTTT | 1795 |
| NF-5  | GGCAATAATTATGCGCTACTCATTCTTATATACCAAACCAAACAGGTGTCTTATTTTT | 1795 |
| NF-4  | GGCAATAATTATGCGCTACTCATTCTTATATACCAAACCAAACAGGTGTCTTATTTTT | 1795 |
| NF-2  | GGCAATAATTATGCGCTACTCATTCTTATATACCAAACCAAACAGGTGTCTTATTTTT | 1800 |
| AF-1  | GGCAATAATTATGCGCTACTCATTCTTATATACCAAACCAAACAGGTGTCTTATTTTT | 1795 |
| AF-3  | GGCAATAATTATGCGCTACTCATTCTTATATACCAAACCAAACAGGTGTCTTATTTTT | 1786 |
| AF-9  | GGCAATAATTATGCGCTACTCATTCTTATATACCAAACCAAACAGGTGTCTTATTTTT | 1786 |
| AF-8  | GGCAATAATTATGCGCTACTCATTCTTATATACCAAACCAAACAGGTGTCTTATTTTT | 1786 |
| AF-6  | GGCAATAATTATGCGCTACTCATTCTTATATACCAAACCAAACAGGTGTCTTATTTTT | 1786 |
| AF-2  | GGCAATAATTATGCGCTACTCATTCTTATATACCAAACCAAACAGGTGTCTTATTTTT | 1791 |
| AF-10 | GGCAATAATTATGCGCTACTCATTCTTATATACCAAACCAAACAGGTGTCTTATTTTT | 1791 |
| AF-7  | GGCAATAATTATGCGCTACTCATTCTTATATACCAAACCAAACAGGTGTCTTATTTTT | 1791 |
| AF-5  | GGCAATAATTATGCGCTACTCATTCTTATATACCAAACCAAACAGGTGTCTTATTTTT | 1791 |
| AF-4  | GGCAATAATTATGCGCTACTCATTCTTATATACCAAACCAAACAGGTGTCTTATTTTT | 1791 |
| NF-10 | GGCAATAATTATGCGCTACTCATTCTTATATACCAAACCAAACAGGTGTCTTATTTTT | 1791 |
| NF-3  | GGCAATAATTATGCGCTACTCATTCTTATATACCAAACCAAACAGGTGTCTTATTTTT | 1791 |
|       | *****                                                      |      |

|       |                                                               |      |
|-------|---------------------------------------------------------------|------|
|       | #                                                             |      |
| NF-8  | TGCAAGACTATTCCAGCTATTTTTTAGAGCGATTGGTTGAACGACAAGGTGTCCAAAGTTG | 1855 |
| NF-6  | TGCAAGACTATTCCAGCTATTTTTTAGAGCGATTGGTTGAACGACAAGGTGTCCAAAGTTG | 1855 |
| NF-9  | TGCAAGACTATTCCAGCTATTTTTTAGAGCGATTGGTTGAACGACAAGGTGTCCAAAGTTG | 1855 |
| NF-7  | TGCAAGACTATTCCAGCTATTTTTTAGAGCGATTGGTTGAACGACAAGGTGTCCAAAGTTG | 1855 |
| NF-1  | TGCAAGACTATTCCAGCTATTTTTTAGAGCGATTGGTTGAACGACAAGGTGTCCAAAGTTG | 1855 |
| NF-5  | TGCAAGACTATTCCAGCTATTTTTTAGAGCGATTGGTTGAACGACAAGGTGTCCAAAGTTG | 1855 |
| NF-4  | TGCAAGACTATTCCAGCTATTTTTTAGAGCGATTGGTTGAACGACAAGGTGTCCAAAGTTG | 1855 |
| NF-2  | TGCAAGACTATTTCAGCTATTTTTTAGAGCGATTGGTTGAACGACAAGGTGTCCAAAGTTG | 1860 |
| AF-1  | TGCAAGACTATTTCAGCTATTTTTTAGAGCGATTGGTTGAACGACAAGGTGTCCAAAGTTG | 1855 |
| AF-3  | TGCAAGACTATTTCAGATATTTTTTAGAGCGATTGGTTGAACGACAAGGTGTCCAAAGTTG | 1846 |
| AF-9  | TGCAAGACTATTTCAGATATTTTTTAGAGCGATTGGTTGAACGACAAGGTGTCCAAAGTTG | 1846 |
| AF-8  | TGCAAGACTATTTCAGATATTTTTTAGAGCGATTGGTTGAACGACAAGGTGTCCAAAGTTG | 1846 |
| AF-6  | TGCAAGACTATTTCAGATATTTTTTAGAGCGATTGGTTGAACGACAAGGTGTCCAAAGTTG | 1846 |
| AF-2  | TGCAAGACTGTTTCAGCTATTTTTTAGAGCGATTGGTTGAACGACAAGGTGTCCAAAGTTG | 1851 |
| AF-10 | TGCAAGACTGTTTCAGCTATTTTTTAGAGCGATTGGTTGAACGACAAGGTGTCCAAAGTTG | 1851 |
| AF-7  | TGCAAGACTGTTTCAGCTATTTTTTAGAGCGATTGGTTGAACGACAAGGTGTCCAAAGTTG | 1851 |
| AF-5  | TGCAAGACTGTTTCAGCTATTTTTTAGAGCGATTGGTTGAACGACAAGGTGTCCAAAGTTG | 1851 |
| AF-4  | TGCAAGACTGTTTCAGCTATTTTTTAGAGCGATTGGTTGAACGACAAGGTGTCCAAAGTTG | 1851 |
| NF-10 | TGCAAGACTATTTCAGCTATTTTTTAGAGCGATTGGTTGAACGACAAGGTGTCCAAAGTTG | 1851 |
| NF-3  | TGCAAGACTATTTCAGCTATTTTTTAGAGCGATTGGTTGAACGACAAGGTGTCCAAAGTTG | 1851 |
|       | ***** ** *                                                    |      |

|      |                                         |      |
|------|-----------------------------------------|------|
| NF-8 | TGTGCACATATGTACATATATGTGTACCTCTGCGGACCT | 1895 |
| NF-6 | TGTGCACATATGTACATATATGTGTACCTCTGCGGACCT | 1895 |
| NF-9 | TGTGCACATATGTACATATATGTGTACCTCTGCGGACCT | 1895 |
| NF-7 | TGTGCACATATGTACATATATGTGTACCTCTGCGGACCT | 1895 |
| NF-1 | TGTGCACATATGTACATATATGTGTACCTCTGCGGACCT | 1895 |
| NF-5 | TGTGCACATATGTACATATATGTGTACCTCTGCGGACCT | 1895 |
| NF-4 | TGTGCACATATGTACATATATGTGTACCTCTGCGGACCT | 1895 |

|       |                                         |      |
|-------|-----------------------------------------|------|
| NF-2  | TGTGCACATATGTACATATATGTGTACCTCTGCGGACCT | 1900 |
| AF-1  | TGTGCACATATGTACATATATGTGTACCTCTGCGGACCT | 1895 |
| AF-3  | TGTGCACATATGTACATATATGTGTACCTCTGCGGACCT | 1886 |
| AF-9  | TGTGCACATATGTACATATATGTGTACCTCTGCGGACCT | 1886 |
| AF-8  | TGTGCACATATGTACATATATGTGTACCTCTGCGGACCT | 1886 |
| AF-6  | TGTGCACATATGTACATATATGTGTACCTCTGCGGACCT | 1886 |
| AF-2  | TGTGCACATATGTACATATATGTGTACCTCTGCGGACCT | 1891 |
| AF-10 | TGTGCACATATGTACATATATGTGTACCTCTGCGGACCT | 1891 |
| AF-7  | TGTGCACATATGTACATATATGTGTACCTCTGCGGACCT | 1891 |
| AF-5  | TGTGCACATATGTACATATATGTGTACCTCTGCGGACCT | 1891 |
| AF-4  | TGTGCACATATGTACATATATGTGTACCTCTGCGGACCT | 1891 |
| NF-10 | TGTGCACATATGTACATATATGTGTACCTCTGCGGACCT | 1891 |
| NF-3  | TGTGCACATATGTACATATATGTGTACCTCTGCGGACCT | 1891 |
|       | *****                                   |      |
